# Supplementary material for: Effectiveness and Safety of a Novel Care Model for the Management of Type 2 Diabetes at 1 Year: An Open-Label, Non-Randomized, Controlled Study
Source: Springer Nature journal article supplement (doi:10.1007/s13300-018-0373-9), 2018-02-07
Supplement: MOESM1 [file 15445694]

## Supplementary Materials

Effectiveness and Safety of a Novel Care Model for the Management of Type 2 Diabetes at One Year:

An Open-Label, Non-Randomized, Controlled Study

### Supplementary Materials A.

#### Methods - Full Inclusion and Exclusion Criteria

Participants were 21 to 65 years old and were excluded if they had serious renal, hepatic, or cardiovascular dysfunction, infectious disease, uncontrolled psychiatric disorder, history of ketoacidosis, intolerance to dietary fat, cancer with active treatment in the last five years, pregnancy, or planned pregnancy.

Inclusion Criteria:

- Diabetes: Diagnosis of type-2 diabetes without end-organ failure
- BMI: > 25
- Ethnicity: all ethnic groups
- Age: 21 to 65 years

Exclusion Criteria:

- Type 1 diabetes
- History of keto-acidosis
- History of myocardial infarction, stroke, angina, or coronary insufficiency within the last 6 months
- Diabetic retinopathy requiring treatment
- Creatinine > 2.0 mg·dL<sup>-1</sup> or > 152.5 μmol·L<sup>-1</sup>
- Urinary albumin > 1 g·dL<sup>-1</sup> or > 10 g·L<sup>-1</sup>

- Impaired hepatic function (Bilirubin >2 mg·dL<sup>-1</sup> or >34.2 μmol·L<sup>-1</sup> , Albumin < 3.5 g·dL<sup>-1</sup> or <35 g·L<sup>-1</sup>)
- Cholelithiasis or biliary dysfunction
- Cancer requiring treatment in the past 5 years, with the exception of non-melanoma skin cancer
- Chronic infectious disease requiring ongoing treatment
- Other chronic diseases or condition likely to limit lifespan to <6 years
- Non-English speaking
- Unable or unwilling to participate in group sessions (e.g., plans to relocate within the next year) or conform to a carbohydrate restricted diet lifestyle (e.g., food intolerances, religious or personal restrictions)
- Weight loss of >10% in past 6 months
- Currently pregnant or nursing, or planning to become pregnant during the study
- Major psychiatric disorder (e.g., schizophrenia, bipolar disorder) currently uncontrolled
- Excessive alcohol intake (acute or chronic) defined as average consumption of 3 or more alcohol-containing beverages daily or consumption of more than 14 alcoholic beverages per week

## Supplementary Materials B.

### Methods - Medication Management

All medication changes were tracked in a database visible to the medical provider and health coach. Upon commencing dietary changes, insulin and sulfonylurea doses were reduced or eliminated to safely adjust for anticipated decreases in glucose concentrations based on the study physician's clinical judgment of the participant's most recent HbA<sub>1c</sub>, participant-reported last two weeks of blood glucose measurements, and other concurrent anti-diabetic medications. Similarly, prescription of SGLT-2 inhibitors were discontinued at onset of dietary changes.[1] In the following days and weeks, participants reported BHB and glucoses one to three times per day via the app, based on medical provider instructions. Health coaches and medical providers monitored BHB and glucose, and the medical provider prescribed medication changes as necessary based on glucose and BHB trends and concurrent medication use with a goal of maintaining any reported glucose (fasting, pre-meal or post-meal) between 120 and 180 mg·dL<sup>-1</sup> (6.66 and 9.99 mmol·L<sup>-1</sup>) until the medication could be eliminated. During medication management, the primary focus was on preventing episodes of symptomatic hypoglycemia in patients. Any reported blood glucose <100 mg·dL<sup>-1</sup> (<5.55 mmol·L<sup>-1</sup>) prompted insulin or sulfonylurea reduction of 10-50%. Medication eliminations typically occurred by first discontinuing sulfonylureas, followed by short-acting, and then long-acting insulin. Every patient prescribed short-acting insulin was instructed not to take any insulin if blood glucose was <120 mg·dL<sup>-1</sup> (<6.66 mmol·L<sup>-1</sup>); for blood glucose ≥120 mg·dL<sup>-1</sup> (≥6.66 mmol·L<sup>-1</sup>), the newly prescribed dose was reduced in 20 - 50% increments in anticipation of reduction in dietary

carbohydrates until the bolus or sliding scale was no longer needed.

Thiazolidinediones, DPP-4 inhibitors, and GLP-1 were discontinued after elimination of insulin and sulfonylureas and reported blood glucoses were consistently under 100 mg·dL<sup>-1</sup> (5.55 mmol·L<sup>-1</sup>). Metformin, given its effectiveness, low cost, and tolerability[2,3], was generally not eliminated unless the participants reported side effects or requested discontinuation.

At any time during the study, reported blood glucoses consistently above 180 mg·dL<sup>-1</sup> (9.99 mmol·L<sup>-1</sup>), generally, >3 times within a week and sustained for >1 week, prompted a medication increase or addition. If the participant was previously prescribed insulin, long-acting insulin was the first medication re-started. If the participant was previously prescribed a DPP-4 inhibitor, GLP-1, or a thiazolidinedione without insulin or sulfonylurea use, these were re-started. Two participants self-resumed taking their SGLT-2 inhibitors without physician direction. In these participants, BHB was monitored at least once daily, and no values of concern were reported. In all participants, blood glucose levels were monitored for trends up and down, which prompted the appropriate medication adjustments.

Fifty percent of CCI participants entered the trial with statin prescriptions. Among completers, prescriptions were discontinued at patient request (n=18). In some cases, prescriptions were added (n=10) or increased (n=3) when deemed beneficial. Medication adjustments occurred both via remote care and at on-site clinic visits.

## Supplementary Materials C.

### Methods - Education

Education provided participants an understanding of the core concepts and implementation instructions to enable initial achievement of nutritional ketosis and behavior change. Content included the pathophysiology of diabetes, practical management of carbohydrate restriction while consuming protein in moderation and increasing fat intake with a goal of achieving nutritional ketosis, how to assess and utilize BHB as a biofeedback mechanism and implementing of behavior change techniques. Additional resources were provided to participants to supplement their education, such as guides, blog posts, and recipes.

### Examples of Educational Modules

- Introduction
- Prepare for Adaptation
- Adaptation
- Understanding ketones and self-testing
- Navigating the social scene
- Beverages and sweeteners
- Dietary supplements
- Cholesterol and lipids
- Fiber
- Goal setting
- Body image
- Personalizing physical activity
- Maintenance
- Advanced lipid metabolism

## Supplementary Materials D.

### Methods – Laboratory Analysis

Blood analytes determined via standard procedures at a CLIA accredited laboratory at the time of draw included the following tests and panels: HbA<sub>1c</sub>, complete blood count (CBC), complete metabolic panel (CMP), high-sensitive C-reactive protein (hsCRP), uric acid, thyroid stimulating hormone (TSH), free T4 (FT4), and lipids. HbA<sub>1c</sub> was determined from EDTA-treated whole blood using high performance liquid chromatography on Bio-Rad Variant II Turbo 2.0. Complete blood count with differential was determined from EDTA-treated whole blood with flow cytometry on a Beckman Coulter DxH80. Lithium-heparin treated plasma was utilized to determine the CMP, hsCRP, and uric acid with a Beckman Coulter AU680 and to determine TSH and FT4 via chemiluminescent detection on the Beckman Coulter DXI600. Estimated glomerular filtration rate (eGFR) was calculated from serum creatinine, gender, race, and age[4]. 5.2% of all participants were African American.

Aliquots of serum were stored at -80°C and thawed once for later analysis of blood lipids, insulin, C-peptide, and BHB by a CLIA accredited laboratory. FDA approved methods were utilized for insulin, C-peptide (cobas e601, Roche Diagnostics; Indianapolis, IN, USA) and ApoB, total cholesterol, triglycerides, direct HDL (cobas c501, Roche Diagnostics; Indianapolis, IN, USA). LDL was calculated using the Friedewald equation. Beta-hydroxybutyrate was performed with research use only assays, using a coupled enzymatic assay (Stanbio Laboratory, Boerne, TX) on an open channel of the cobas c501. HOMA-IR derived from fasting serum insulin

concentrations was calculated as (fasting insulin x fasting glucose)/22.5 in participants not using insulin medication.[5] Homeostatic model assessment for insulin resistance (HOMA-IR) derived from C-peptide was calculated on all participants without regard to their insulin use from the updated HOMA2 (computer) model.[6]

#### **Supplementary Materials References**

1. Handelsman Y, Henry RR, Bloomgarden ZT, Dagogo-Jack S, DeFronzo RA, Einhorn D, et al. American Association of Clinical Endocrinologists and American College of Endocrinology Position Statement on the Association of SGLT-2 Inhibitors and Diabetic Ketoacidosis. *Endocrine Practice*. 2016 Jun;22(6):753–62.
2. American Diabetes Association. Standards of Medical Care in Diabetes—2018. *Diabetes Care*. 2018 Jan 1;41(Supplement 1):S1–S172.
3. Handelsman Y, Bloomgarden ZT, Grunberger G, Umpierrez G, Zimmerman RS, Bailey TS, et al. American Association of Clinical Endocrinologists and American College of Endocrinology – Clinical Practice Guidelines for Developing a Diabetes Mellitus Comprehensive Care Plan – 2015. *Endocrine Practice*. 2015 Apr;21(Supplement 1):1–87.
4. Levey AS, Stevens LA, Schmid CH, Zhang YL, Castro AF III, Feldman HI, et al. A New Equation to Estimate Glomerular Filtration Rate. *Ann Intern Med*. 2009 May 5;150(9):604–16.
5. Matthews DR, Hosker JP, Rudenski AS, Naylor BA, Treacher DF, Turner RC. Homeostasis model assessment: insulin resistance and  $\beta$ -cell function from fasting plasma glucose and insulin concentrations in man. *Diabetologia*. 1985 Jul;28(7):412–9.
6. Levy JC, Matthews DR, Hermans MP. Correct homeostasis model assessment (HOMA) evaluation uses the computer program. *Diabetes Care*. 1998 Dec;21(12):2191–2.

**Table S1. Baseline characteristics of the recruited sample, completers, and participants with missing data by treatment arm.**

|                                        | All |                       | Completers with data |                       | Dropout or missing data |                       | Completers-<br>Dropouts |
|----------------------------------------|-----|-----------------------|----------------------|-----------------------|-------------------------|-----------------------|-------------------------|
|                                        | N   | Mean (SD) or $\pm$ SE | N                    | Mean (SD) or $\pm$ SE | N                       | Mean (SD) or $\pm$ SE | Mean $\pm$ SE           |
| <b>Age (years)</b>                     |     |                       |                      |                       |                         |                       |                         |
| All                                    | 349 | 53.4 (8.67)           | 296                  | 53.46 (8.75)          | 53                      | 53.06 (8.25)          | 0.4 $\pm$ 1.24          |
| CCI-all education <sup>a</sup>         | 262 | 53.75 (8.35)          | 218                  | 54.09 (8.35)          | 44                      | 52.09 (8.25)          | 2.0 $\pm$ 1.37          |
| CCI-web <sup>a</sup>                   | 126 | 53.39 (8.19)          | 104                  | 53.49 (8.23)          | 22                      | 51.27 (8.44)          | 0.58 $\pm$ 1.92         |
| CCI-onsite <sup>a</sup>                | 136 | 54.09 (8.52)          | 114                  | 54.63 (8.47)          | 9                       | 57.78 (6.85)          | 3.36 $\pm$ 1.97         |
| Usual care <sup>a</sup>                | 87  | 52.33 (9.52)          | 78                   | 51.71 (9.62)          | 9                       | 57.78 (6.85)          | -6.07 $\pm$ 2.53*       |
| CCI-web vs. CCI-onsite <sup>b</sup>    |     | -0.7 $\pm$ 1.03       |                      | -1.14 $\pm$ 1.13      |                         | 1.64 $\pm$ 2.5        |                         |
| CCI-web vs. usual care <sup>b</sup>    |     | 1.06 $\pm$ 1.25       |                      | 1.79 $\pm$ 1.36       |                         | -4.87 $\pm$ 2.87      |                         |
| CCI-onsite vs. usual care <sup>b</sup> |     | 1.75 $\pm$ 1.26       |                      | 2.93 $\pm$ 1.35       |                         | -6.51 $\pm$ 2.91      |                         |
| CCI-all vs. usual care <sup>b</sup>    |     | 1.42 $\pm$ 1.14       |                      | 2.38 $\pm$ 1.23*      |                         | -5.69 $\pm$ 2.6*      |                         |
| <b>Female (%)</b>                      |     |                       |                      |                       |                         |                       |                         |
| All                                    | 349 | 64.76 $\pm$ 2.55      | 296                  | 63.85 $\pm$ 2.79      | 53                      | 69.81 $\pm$ 6.31      | -5.96 $\pm$ 6.9         |
| CCI-all education <sup>a</sup>         | 262 | 66.79 $\pm$ 2.91      | 218                  | 65.14 $\pm$ 3.23      | 44                      | 75.0 $\pm$ 6.53       | -9.86 $\pm$ 7.28        |
| CCI-web <sup>a</sup>                   | 126 | 61.9 $\pm$ 4.33       | 104                  | 57.69 $\pm$ 4.84      | 22                      | 81.82 $\pm$ 8.22      | -24.13 $\pm$ 9.54*      |
| CCI-onsite <sup>a</sup>                | 136 | 71.32 $\pm$ 3.88      | 114                  | 71.93 $\pm$ 4.21      | 22                      | 68.18 $\pm$ 9.93      | 3.75 $\pm$ 10.79        |
| Usual care <sup>a</sup>                | 87  | 58.62 $\pm$ 5.28      | 78                   | 60.26 $\pm$ 5.54      | 9                       | 44.44 $\pm$ 16.56     | 15.81 $\pm$ 17.47       |
| CCI-web vs. CCI-onsite <sup>b</sup>    |     | -9.42 $\pm$ 5.81      |                      | -14.24 $\pm$ 6.42*    |                         | 13.64 $\pm$ 12.89     |                         |
| CCI-web vs. usual care <sup>b</sup>    |     | 3.28 $\pm$ 6.83       |                      | -2.56 $\pm$ 7.36      |                         | 37.37 $\pm$ 18.49*    |                         |
| CCI-onsite vs. usual care <sup>b</sup> |     | 12.7 $\pm$ 6.55*      |                      | 11.67 $\pm$ 6.96      |                         | 23.74 $\pm$ 19.31     |                         |
| CCI-all vs. usual care <sup>b</sup>    |     | 8.17 $\pm$ 6.03       |                      | 4.88 $\pm$ 6.41       |                         | 30.56 $\pm$ 17.8      |                         |
| <b>African American (%)</b>            |     |                       |                      |                       |                         |                       |                         |
| All                                    | 349 | 5.16 $\pm$ 1.18       | 296                  | 4.39 $\pm$ 1.19       | 53                      | 9.43 $\pm$ 4.02       | -5.04 $\pm$ 4.19        |
| CCI-all education <sup>a</sup>         | 262 | 6.87 $\pm$ 1.56       | 218                  | 5.96 $\pm$ 1.6        | 44                      | 11.36 $\pm$ 4.78      | -5.4 $\pm$ 5.05         |
| CCI-web <sup>a</sup>                   | 126 | 5.56 $\pm$ 2.04       | 104                  | 5.77 $\pm$ 2.29       | 22                      | 4.55 $\pm$ 4.44       | 1.22 $\pm$ 4.99         |
| CCI-onsite <sup>a</sup>                | 136 | 8.09 $\pm$ 2.34       | 114                  | 6.14 $\pm$ 2.25       | 22                      | 18.18 $\pm$ 8.22      | -12.04 $\pm$ 8.52       |
| Usual care <sup>a</sup>                | 87  | 0.0 $\pm$ 0.0         | 78                   | 0.0 $\pm$ 0.0         | 9                       | 0.0 $\pm$ 0.0         | 0.0 $\pm$ 0.0           |
| CCI-web vs. CCI-onsite <sup>b</sup>    |     | -2.53 $\pm$ 3.1       |                      | -0.37 $\pm$ 3.21      |                         | -13.64 $\pm$ 9.35     |                         |
| CCI-web vs. usual care <sup>b</sup>    |     | 5.56 $\pm$ 2.04†      |                      | 5.77 $\pm$ 2.29*      |                         | 4.55 $\pm$ 4.44       |                         |
| CCI-onsite vs. usual care <sup>b</sup> |     | 8.09 $\pm$ 2.34‡      |                      | 6.14 $\pm$ 2.25†      |                         | 18.18 $\pm$ 8.22*     |                         |
| CCI-all vs. usual care <sup>b</sup>    |     | 6.87 $\pm$ 1.56§      |                      | 5.96 $\pm$ 1.6‡       |                         | 11.36 $\pm$ 4.78*     |                         |

**Years with type 2 diabetes**

|                                        |     |              |     |              |    |               |              |
|----------------------------------------|-----|--------------|-----|--------------|----|---------------|--------------|
| All                                    | 332 | 8.31 (7.23)  | 288 | 8.26 (7.28)  | 44 | 8.61 (6.97)   | -0.35 ± 1.13 |
| CCI-all education <sup>a</sup>         | 261 | 8.44 (7.22)  | 217 | 8.4 (7.28)   | 44 | 8.61 (6.97)   | -0.21 ± 1.16 |
| CCI-web <sup>a</sup>                   | 126 | 7.88 (6.79)  | 104 | 7.95 (7.03)  | 22 | 7.55 (5.65)   | 0.41 ± 1.39  |
| CCI-onsite <sup>a</sup>                | 135 | 8.96 (7.58)  | 113 | 8.81 (7.51)  | 22 | 9.68 (8.07)   | -0.87 ± 1.86 |
| Usual care <sup>a</sup>                | 71  | 7.85 (7.32)  | 71  | 7.85 (7.32)  |    | Not collected |              |
| CCI-web vs. CCI-onsite <sup>b</sup>    |     | -1.07 ± 0.89 |     | -0.86 ± 0.99 |    |               | -2.14 ± 2.1  |
| CCI-web vs. usual care <sup>b</sup>    |     | 0.04 ± 1.06  |     | 0.11 ± 1.11  |    |               |              |
| CCI-onsite vs. usual care <sup>b</sup> |     | 1.11 ± 1.09  |     | 0.97 ± 1.12  |    |               |              |
| CCI-all vs. usual care <sup>b</sup>    |     | 0.59 (0.9)   |     | 0.56 ± 1.0   |    |               |              |

**Beta-hydroxybutyrate (mmol·L<sup>-1</sup>)**

|                                        |     |             |     |             |    |             |              |
|----------------------------------------|-----|-------------|-----|-------------|----|-------------|--------------|
| All                                    | 327 | 0.17 (0.15) | 245 | 0.16 (0.14) | 82 | 0.19 (0.16) | -0.02 ± 0.02 |
| CCI-all education <sup>a</sup>         | 248 | 0.17 (0.15) | 186 | 0.17 (0.15) | 62 | 0.19 (0.16) | -0.02 ± 0.02 |
| CCI-web <sup>a</sup>                   | 120 | 0.18 (0.15) | 88  | 0.18 (0.15) | 32 | 0.21 (0.16) | -0.03 ± 0.03 |
| CCI-onsite <sup>a</sup>                | 128 | 0.16 (0.16) | 98  | 0.16 (0.15) | 30 | 0.17 (0.16) | -0.01 ± 0.04 |
| Usual care <sup>a</sup>                | 79  | 0.15 (0.13) | 59  | 0.14 (0.12) | 20 | 0.17 (0.15) | -0.03 ± 0.03 |
| CCI-web vs. CCI-onsite <sup>b</sup>    |     | 0.02 ± 0.02 |     | 0.01 ± 0.03 |    | 0.03 ± 0.04 |              |
| CCI-web vs. usual care <sup>b</sup>    |     | 0.03 ± 0.02 |     | 0.03 ± 0.03 |    | 0.03 ± 0.04 |              |
| CCI-onsite vs. usual care <sup>b</sup> |     | 0.01 ± 0.02 |     | 0.02 ± 0.03 |    | 0.0 ± 0.04  |              |
| CCI-all vs. usual care <sup>b</sup>    |     | 0.02 ± 0.02 |     | 0.02 ± 0.02 |    | 0.02 ± 0.04 |              |

**Hemoglobin A<sub>1c</sub> (mmol·mol<sup>-1</sup>)**

|                                        |     |               |     |               |    |               |               |
|----------------------------------------|-----|---------------|-----|---------------|----|---------------|---------------|
| All                                    | 349 | 59.66 (17.16) | 276 | 59.11 (16.62) | 73 | 61.63 (18.91) | -26.04 ± 2.4  |
| CCI-all education <sup>a</sup>         | 262 | 59.55 (16.4)  | 204 | 58.35 (15.3)  | 58 | 63.49 (19.57) | -28.66 ± 2.73 |
| CCI-web <sup>a</sup>                   | 126 | 58.68 (15.41) | 98  | 57.69 (13.99) | 28 | 61.85 (19.46) | -27.57 ± 3.94 |
| CCI-onsite <sup>a</sup>                | 136 | 60.32 (17.38) | 106 | 59.01 (16.51) | 30 | 65.02 (19.89) | -29.65 ± 3.94 |
| Usual care <sup>a</sup>                | 87  | 59.99 (19.24) | 72  | 61.08 (19.89) | 15 | 54.52 (14.87) | -16.97 ± 4.48 |
| CCI-web vs. CCI-onsite <sup>b</sup>    |     | -1.64 ± 2.08  |     | -1.2 ± 2.19   |    | -3.28 ± 5.14  |               |
| CCI-web vs. usual care <sup>b</sup>    |     | -1.31 ± 2.51  |     | -3.39 ± 2.73  |    | 7.32 ± 5.25   |               |
| CCI-onsite vs. usual care <sup>b</sup> |     | 0.33 ± 2.51   |     | -2.19 ± 2.84  |    | 10.6 ± 5.25*  |               |
| CCI-all vs. usual care <sup>b</sup>    |     | -0.44 ± 2.3   |     | -2.73 ± 2.62  |    | 8.96 ± 4.59*  |               |

**Hemoglobin A<sub>1c</sub> (%)**

|                                |     |             |     |             |    |             |              |
|--------------------------------|-----|-------------|-----|-------------|----|-------------|--------------|
| All                            | 349 | 7.61 (1.57) | 276 | 7.56 (1.52) | 73 | 7.79 (1.73) | -0.23 ± 0.22 |
| CCI-all education <sup>a</sup> | 262 | 7.60 (1.50) | 204 | 7.49 (1.4)  | 58 | 7.96 (1.79) | -0.47 ± 0.25 |
| CCI-web <sup>a</sup>           | 126 | 7.52 (1.41) | 98  | 7.43 (1.28) | 28 | 7.81 (1.78) | -0.37 ± 0.36 |
| CCI-onsite <sup>a</sup>        | 136 | 7.67 (1.59) | 106 | 7.55 (1.51) | 30 | 8.10 (1.82) | -0.56 ± 0.36 |

|                                                                 |     |                 |     |                 |    |                  |                |
|-----------------------------------------------------------------|-----|-----------------|-----|-----------------|----|------------------|----------------|
| Usual care <sup>a</sup>                                         | 87  | 7.64 (1.76)     | 72  | 7.74 (1.82)     | 15 | 7.14 (1.36)      | 0.60 ± 0.41    |
| CCI-web vs. CCI-onsite <sup>b</sup>                             |     | -0.15 ± 0.19    |     | -0.11 ± 0.2     |    | -0.3 ± 0.47      |                |
| CCI-web vs. usual care <sup>b</sup>                             |     | -0.12 ± 0.23    |     | -0.31 ± 0.25    |    | 0.67 ± 0.48      |                |
| CCI-onsite vs. usual care <sup>b</sup>                          |     | 0.03 ± 0.23     |     | -0.2 ± 0.26     |    | 0.97 ± 0.48*     |                |
| CCI-all vs. usual care <sup>b</sup>                             |     | -0.04 ± 0.21    |     | -0.25 ± 0.24    |    | 0.82 ± 0.42*     |                |
| <b>Fasting glucose (mmol·L<sup>-1</sup>)</b>                    |     |                 |     |                 |    |                  |                |
| All                                                             | 344 | 8.86 (3.57)     | 273 | 8.78 (3.46)     | 71 | 9.18 (3.96)      | -0.4 ± 0.52    |
| CCI-all education <sup>a</sup>                                  | 258 | 8.92 (3.41)     | 202 | 8.8 (3.28)      | 56 | 9.36 (3.83)      | -0.55 ± 0.56   |
| CCI-web <sup>a</sup>                                            | 123 | 8.61 (3.12)     | 97  | 8.5 (3.05)      | 26 | 9.04 (3.41)      | -0.54 ± 0.74   |
| CCI-onsite <sup>a</sup>                                         | 135 | 9.2 (3.64)      | 105 | 9.08 (3.47)     | 30 | 9.63 (4.21)      | -0.55 ± 0.84   |
| Usual care <sup>a</sup>                                         | 86  | 8.67 (4.03)     | 71  | 8.71 (3.96)     | 15 | 8.5 (4.5)        | 0.21 ± 1.25    |
| CCI-web vs. CCI-onsite <sup>b</sup>                             |     | -0.59 ± 0.42    |     | -0.58 ± 0.46    |    | -0.59 ± 1.02     |                |
| CCI-web vs. usual care <sup>b</sup>                             |     | -0.05 ± 0.52    |     | -0.21 ± 0.56    |    | 0.54 ± 1.34      |                |
| CCI-onsite vs. usual care <sup>b</sup>                          |     | 0.54 ± 0.54     |     | 0.38 ± 0.58     |    | 1.13 ± 1.39      |                |
| CCI-all vs. usual care <sup>b</sup>                             |     | 0.25 ± 0.48     |     | 0.1 ± 0.52      |    | 0.86 ± 1.27      |                |
| <b>Insulin all (pmol·L<sup>-1</sup>)</b>                        |     |                 |     |                 |    |                  |                |
| All                                                             | 327 | 199.25 (167.24) | 245 | 199.81 (172.03) | 82 | 197.59 (153.0)   | 2.22 ± 20.14   |
| CCI-all education <sup>a</sup>                                  | 248 | 198.35 (165.85) | 186 | 197.65 (167.17) | 62 | 200.5 (163.21)   | -2.85 ± 24.1   |
| CCI-web <sup>a</sup>                                            | 120 | 168.07 (110.49) | 88  | 175.99 (121.05) | 32 | 146.26 (71.53)   | 29.72 ± 18.06  |
| CCI-onsite <sup>a</sup>                                         | 128 | 226.68 (200.92) | 98  | 217.03 (198.35) | 30 | 258.28 (209.46)  | -41.25 ± 43.2  |
| Usual care <sup>a</sup>                                         | 79  | 202.17 (172.58) | 59  | 206.68 (187.93) | 20 | 188.77 (119.18)  | 17.99 ± 36.18  |
| CCI-web vs. CCI-onsite <sup>b</sup>                             |     | -58.62 ± 20.42† |     | -41.04 ± 23.82  |    | -112.02 ± 40.28† |                |
| CCI-web vs. usual care <sup>b</sup>                             |     | -34.1 ± 21.88   |     | -30.7 ± 27.64   |    | -42.5 ± 29.52    |                |
| CCI-onsite vs. usual care <sup>b</sup>                          |     | 24.59 ± 26.32   |     | 10.35 ± 31.6    |    | 69.59 ± 46.6     |                |
| CCI-all vs. usual care <sup>b</sup>                             |     | -3.82 ± 22.09   |     | -9.1 ± 27.36    |    | 11.74 ± 33.75    |                |
| <b>Insulin, excluding exogenous users (pmol·L<sup>-1</sup>)</b> |     |                 |     |                 |    |                  |                |
| All                                                             | 219 | 202.86 (167.51) | 160 | 202.79 (174.46) | 59 | 203.0 (148.21)   | -0.14 ± 23.75  |
| CCI-all education <sup>a</sup>                                  | 176 | 204.04 (165.01) | 135 | 203.42 (170.22) | 41 | 205.99 (148.55)  | -2.57 ± 27.43  |
| CCI-web <sup>a</sup>                                            | 84  | 171.68 (100.98) | 60  | 178.63 (110.36) | 24 | 154.46 (71.53)   | 24.17 ± 20.42  |
| CCI-onsite <sup>a</sup>                                         | 92  | 233.56 (203.0)  | 75  | 223.28 (204.6)  | 17 | 278.77 (195.43)  | -55.49 ± 52.99 |
| Usual care <sup>a</sup>                                         | 43  | 198.14 (179.18) | 25  | 199.6 (199.81)  | 18 | 196.13 (151.61)  | 3.47 ± 53.62   |
| CCI-web vs. CCI-onsite <sup>b</sup>                             |     | -61.81 ± 23.89† |     | -44.66 ± 27.57  |    | -124.25 ± 49.59† |                |
| CCI-web vs. usual care <sup>b</sup>                             |     | -26.39 ± 29.45  |     | -20.97 ± 42.43  |    | -41.67 ± 38.61   |                |
| CCI-onsite vs. usual care <sup>b</sup>                          |     | 35.42 ± 34.59   |     | 23.68 ± 46.39   |    | 82.65 ± 59.45    |                |
| CCI-all vs. usual care <sup>b</sup>                             |     | 5.9 ± 30.0      |     | 3.89 ± 42.57    |    | 9.86 ± 42.57     |                |

**C-peptide (nmol·L<sup>-1</sup>)**

|                                        |     |              |     |              |    |              |              |
|----------------------------------------|-----|--------------|-----|--------------|----|--------------|--------------|
| All                                    | 326 | 1.43 (0.74)  | 244 | 1.44 (0.74)  | 82 | 1.42 (0.72)  | 0.02 ± 0.09  |
| CCI-all education <sup>a</sup>         | 247 | 1.45 (0.71)  | 185 | 1.47 (0.72)  | 62 | 1.39 (0.69)  | 0.07 ± 0.1   |
| CCI-web <sup>a</sup>                   | 120 | 1.38 (0.68)  | 88  | 1.4 (0.74)   | 32 | 1.32 (0.46)  | 0.07 ± 0.11  |
| CCI-onsite <sup>a</sup>                | 127 | 1.52 (0.73)  | 97  | 1.53 (0.69)  | 30 | 1.47 (0.87)  | 0.06 ± 0.17  |
| Usual care <sup>a</sup>                | 79  | 1.38 (0.82)  | 59  | 1.35 (0.82)  | 20 | 1.49 (0.84)  | -0.14 ± 0.22 |
| CCI-web vs. CCI-onsite <sup>b</sup>    |     | -0.14 ± 0.09 |     | -0.13 ± 0.11 |    | -0.15 ± 0.18 |              |
| CCI-web vs. usual care <sup>b</sup>    |     | -0.01 ± 0.11 |     | 0.05 ± 0.13  |    | -0.16 ± 0.21 |              |
| CCI-onsite vs. usual care <sup>b</sup> |     | 0.13 ± 0.11  |     | 0.18 ± 0.13  |    | -0.02 ± 0.24 |              |
| CCI-all vs. usual care <sup>b</sup>    |     | 0.07 ± 0.1   |     | 0.12 ± 0.12  |    | -0.09 ± 0.21 |              |

**HOMA-IR (insulin derived), all**

|                                        |     |                           |     |               |    |                           |              |
|----------------------------------------|-----|---------------------------|-----|---------------|----|---------------------------|--------------|
| All                                    | 322 | 11.52 (12.28)             | 235 | 11.22 (12.14) | 87 | 12.34 (12.7)              | -1.12 ± 1.57 |
| CCI-all education <sup>a</sup>         | 244 | 11.8 (13.14)              | 179 | 11.19 (12.75) | 65 | 13.48 (14.12)             | -2.3 ± 1.99  |
| CCI-web <sup>a</sup>                   | 117 | 9.59 (8.37)               | 84  | 9.9 (9.26)    | 33 | 8.8 (5.54)                | 1.1 ± 1.4    |
| CCI-onsite <sup>a</sup>                | 127 | 13.84 (16.11)             | 95  | 12.33 (15.14) | 32 | 18.32 (18.23)             | -5.99 ± 3.58 |
| Usual care <sup>a</sup>                | 78  | 10.64 (9.12)              | 56  | 11.31 (10.05) | 22 | 8.94 (6.03)               | 2.36 ± 1.86  |
| CCI-web vs. CCI-onsite <sup>b</sup>    |     | -4.25 ± 1.63 <sup>†</sup> |     | -2.43 ± 1.85  |    | -9.52 ± 3.36 <sup>†</sup> |              |
| CCI-web vs. usual care <sup>b</sup>    |     | -1.05 ± 1.29              |     | -1.4 ± 1.68   |    | -0.15 ± 1.61              |              |
| CCI-onsite vs. usual care <sup>b</sup> |     | 3.2 ± 1.76                |     | 1.02 ± 2.05   |    | 9.37 ± 3.47 <sup>†</sup>  |              |
| CCI-all vs. usual care <sup>b</sup>    |     | 1.16 ± 1.33               |     | -0.12 ± 1.65  |    | 4.54 ± 2.17               |              |

**HOMA-IR (insulin derived), excluding exogenous users**

|                                        |     |                           |     |               |    |                            |              |
|----------------------------------------|-----|---------------------------|-----|---------------|----|----------------------------|--------------|
| All                                    | 215 | 11.30 (12.96)             | 154 | 10.74 (12.94) | 61 | 12.72 (13.01)              | -1.98 ± 1.97 |
| CCI-all education <sup>a</sup>         | 172 | 11.77 (13.87)             | 129 | 11.00 (13.53) | 43 | 14.09 (14.76)              | -3.08 ± 2.55 |
| CCI-web <sup>a</sup>                   | 81  | 9.08 (7.16)               | 57  | 9.21 (7.82)   | 24 | 8.79 (5.39)                | 0.41 ± 1.51  |
| CCI-onsite <sup>a</sup>                | 91  | 14.17 (17.54)             | 72  | 12.42 (16.65) | 19 | 20.77 (19.66)              | -8.35 ± 4.92 |
| Usual care <sup>a</sup>                | 43  | 9.40 (8.25)               | 25  | 9.36 (9.39)   | 18 | 9.45 (6.61)                | -0.09 ± 2.44 |
| CCI-web vs. CCI-onsite <sup>b</sup>    |     | -5.08 ± 2.00 <sup>*</sup> |     | -3.22 ± 2.22  |    | -11.98 ± 4.64 <sup>†</sup> |              |
| CCI-web vs. usual care <sup>b</sup>    |     | -0.32 ± 1.49              |     | -0.16 ± 2.14  |    | -0.66 ± 1.91               |              |
| CCI-onsite vs. usual care <sup>b</sup> |     | 4.76 ± 2.23 <sup>*</sup>  |     | 3.06 ± 2.72   |    | 11.32 ± 4.77 <sup>*</sup>  |              |
| CCI-all vs. usual care <sup>b</sup>    |     | 2.37 ± 1.64               |     | 1.64 ± 2.22   |    | 4.63 ± 2.74                |              |

**HOMA-IR (C-peptide derived)**

|                                |     |              |     |              |    |               |              |
|--------------------------------|-----|--------------|-----|--------------|----|---------------|--------------|
| All                            | 311 | 11.44 (7.17) | 217 | 11.25 (6.59) | 94 | 11.87 (8.38)  | -0.63 ± 0.97 |
| CCI-all education <sup>a</sup> | 239 | 11.52 (7.15) | 170 | 11.44 (6.26) | 69 | 11.72 (9.04)  | -0.28 ± 1.19 |
| CCI-web <sup>a</sup>           | 115 | 10.52 (5.72) | 79  | 10.75 (6.29) | 36 | 10.01 (4.24)  | 0.74 ± 1.00  |
| CCI-onsite <sup>a</sup>        | 124 | 12.45 (8.18) | 91  | 12.04 (6.20) | 33 | 13.59 (12.13) | -1.55 ± 2.21 |



|                                        |     |                |     |                |    |                |               |
|----------------------------------------|-----|----------------|-----|----------------|----|----------------|---------------|
| Usual care <sup>a</sup>                | 72  | 11.16 (7.26)   | 47  | 10.56 (7.70)   | 25 | 12.29 (6.33)   | -1.73 ± 1.69  |
| CCI-web vs. CCI-onsite <sup>b</sup>    |     | -1.93 ± 0.91*  |     | -1.29 ± 0.96   |    | -3.58 ± 2.23   |               |
| CCI-web vs. usual care <sup>b</sup>    |     | -0.64 ± 1.01   |     | 0.19 ± 1.33    |    | -2.28 ± 1.45   |               |
| CCI-onsite vs. usual care <sup>b</sup> |     | 1.29 ± 1.13    |     | 1.48 ± 1.30    |    | 1.3 ± 2.46     |               |
| CCI-all vs. usual care <sup>b</sup>    |     | 0.36 ± 0.97    |     | 0.88 ± 1.22    |    | -0.56 ± 1.67   |               |
| <b>Weight-clinic (kg)</b>              |     |                |     |                |    |                |               |
| All                                    | 340 | 113.85 (25.47) | 253 | 113.06 (24.24) | 87 | 116.14 (28.77) | -3.08 ± 3.44  |
| CCI-all education <sup>a</sup>         | 257 | 116.51 (25.94) | 184 | 115.42 (24.62) | 73 | 119.25 (29.01) | -3.83 ± 3.85  |
| CCI-web <sup>a</sup>                   | 121 | 114.58 (27.08) | 84  | 114.78 (25.87) | 37 | 114.14 (30.01) | 0.64 ± 5.68   |
| CCI-onsite <sup>a</sup>                | 136 | 118.22 (24.86) | 100 | 115.96 (23.63) | 36 | 124.5 (27.36)  | -8.54 ± 5.14  |
| Usual care <sup>a</sup>                | 83  | 105.63 (22.15) | 69  | 106.79 (22.18) | 14 | 99.94 (21.86)  | 6.84 ± 6.42   |
| CCI-web vs. CCI-onsite <sup>b</sup>    |     | -3.64 ± 3.26   |     | -1.18 ± 3.68   |    | -10.36 ± 6.72  |               |
| CCI-web vs. usual care <sup>b</sup>    |     | 8.95 ± 3.46†   |     | 7.99 ± 3.89*   |    | 14.2 ± 7.65    |               |
| CCI-onsite vs. usual care <sup>b</sup> |     | 12.58 ± 3.23§  |     | 9.17 ± 3.57†   |    | 24.55 ± 7.41‡  |               |
| CCI-all vs. usual care <sup>b</sup>    |     | 10.87 ± 2.92§  |     | 8.63 ± 3.23†   |    | 19.3 ± 6.76†   |               |
| <b>Weight-home scale (kg)</b>          |     |                |     |                |    |                |               |
| CCI-all education <sup>a</sup>         | 262 | 116.4 (26.31)  | 218 | 116.29 (25.25) | 44 | 116.94 (31.37) | -0.64 ± 5.03  |
| CCI-web <sup>a</sup>                   | 126 | 114.52 (27.52) | 104 | 116.05 (27.42) | 22 | 107.26 (27.42) | 8.8 ± 6.44    |
| CCI-onsite <sup>a</sup>                | 136 | 118.14 (25.12) | 114 | 116.51 (23.21) | 22 | 126.61 (32.65) | -10.11 ± 7.29 |
| CCI-web vs. CCI-onsite <sup>b</sup>    |     | -3.62 ± 3.26   |     | -0.45 ± 3.46   |    | -19.36 ± 9.09* |               |
| <b>BMI (kg·m<sup>-2</sup>)</b>         |     |                |     |                |    |                |               |
| All                                    | 340 | 39.52 (8.6)    | 253 | 39.13 (7.89)   | 87 | 40.66 (10.36)  | -1.54 ± 1.22  |
| CCI-all education <sup>a</sup>         | 257 | 40.43 (8.81)   | 184 | 39.87 (7.88)   | 73 | 41.82 (10.75)  | -1.94 ± 1.39  |
| CCI-web <sup>a</sup>                   | 121 | 39.36 (9.12)   | 84  | 38.82 (7.81)   | 37 | 40.6 (11.6)    | -1.79 ± 2.09  |
| CCI-onsite <sup>a</sup>                | 136 | 41.37 (8.44)   | 100 | 40.76 (7.86)   | 36 | 43.06 (9.82)   | -2.3 ± 1.82   |
| Usual care <sup>a</sup>                | 83  | 36.72 (7.26)   | 69  | 37.14 (7.62)   | 14 | 34.66 (4.8)    | 2.48 ± 1.58   |
| CCI-web vs. CCI-onsite <sup>b</sup>    |     | -2.01 ± 1.1    |     | -1.95 ± 1.16   |    | -2.46 ± 2.51   |               |
| CCI-web vs. usual care <sup>b</sup>    |     | 2.64 ± 1.15*   |     | 1.68 ± 1.25    |    | 5.94 ± 2.3†    |               |
| CCI-onsite vs. usual care <sup>b</sup> |     | 4.65 ± 1.08§   |     | 3.62 ± 1.21†   |    | 8.4 ± 2.08§    |               |
| CCI-all vs. usual care <sup>b</sup>    |     | 3.7 ± 0.97‡    |     | 2.73 ± 1.09†   |    | 7.15 ± 1.8§    |               |
| <b>Systolic blood pressure (mmHg)</b>  |     |                |     |                |    |                |               |
| All                                    | 339 | 131.44 (13.99) | 254 | 131.51 (14.14) | 85 | 131.22 (13.6)  | 0.29 ± 1.72   |
| CCI-all education <sup>a</sup>         | 260 | 131.94 (14.09) | 187 | 132.51 (14.54) | 73 | 130.47 (12.84) | 2.05 ± 1.84   |
| CCI-web <sup>a</sup>                   | 124 | 132.66 (14.15) | 87  | 133.22 (14.78) | 37 | 131.35 (12.63) | 1.87 ± 2.61   |
| CCI-onsite <sup>a</sup>                | 136 | 131.28 (14.06) | 100 | 131.9 (14.38)  | 36 | 129.56 (13.16) | 2.34 ± 2.62   |

|                                                |     |                |     |                |    |                |                |
|------------------------------------------------|-----|----------------|-----|----------------|----|----------------|----------------|
| Usual care <sup>a</sup>                        | 79  | 129.8 (13.61)  | 67  | 128.72 (12.65) | 12 | 135.83 (17.49) | -7.12 ± 5.28   |
| CCI-web vs. CCI-onsite <sup>b</sup>            |     | 1.38 ± 1.75    |     | 1.32 ± 2.14    |    | 1.8 ± 3.02     |                |
| CCI-web vs. usual care <sup>b</sup>            |     | 2.86 ± 1.99    |     | 4.5 ± 2.21*    |    | -4.48 ± 5.46   |                |
| CCI-onsite vs. usual care <sup>b</sup>         |     | 1.48 ± 1.95    |     | 3.18 ± 2.11    |    | -6.28 ± 5.5    |                |
| CCI-all vs. usual care <sup>b</sup>            |     | 2.14 ± 1.76    |     | 3.8 ± 1.88*    |    | -5.37 ± 5.27   |                |
| <b>Diastolic blood pressure (mmHg)</b>         |     |                |     |                |    |                |                |
| All                                            | 339 | 82.07 (8.4)    | 254 | 81.46 (8.04)   | 85 | 83.88 (9.2)    | -2.42 ± 1.12*  |
| CCI-all education <sup>a</sup>                 | 260 | 82.09 (8.25)   | 187 | 81.59 (8.05)   | 73 | 83.37 (8.67)   | -1.78 ± 1.17   |
| CCI-web <sup>a</sup>                           | 124 | 82.6 (8.85)    | 87  | 81.52 (8.27)   | 37 | 85.14 (9.74)   | -3.62 ± 1.83*  |
| CCI-onsite <sup>a</sup>                        | 136 | 81.63 (7.67)   | 100 | 81.66 (7.9)    | 36 | 81.56 (7.09)   | 0.1 ± 1.42     |
| Usual care <sup>a</sup>                        | 79  | 82.0 (8.93)    | 67  | 81.1 (8.07)    | 12 | 87.0 (11.95)   | -5.9 ± 3.59    |
| CCI-web vs. CCI-onsite <sup>b</sup>            |     | 0.96 ± 1.03    |     | -0.14 ± 1.19   |    | 3.58 ± 1.99    |                |
| CCI-web vs. usual care <sup>b</sup>            |     | 0.6 ± 1.28     |     | 0.41 ± 1.33    |    | -1.86 ± 3.8    |                |
| CCI-onsite vs. usual care <sup>b</sup>         |     | -0.37 ± 1.2    |     | 0.56 ± 1.26    |    | -5.44 ± 3.65   |                |
| CCI-all vs. usual care <sup>b</sup>            |     | 0.09 ± 1.13    |     | 0.49 ± 1.15    |    | -3.63 ± 3.6    |                |
| <b>Total cholesterol (mmol·L<sup>-1</sup>)</b> |     |                |     |                |    |                |                |
| All                                            | 326 | 4.76 (1.09)    | 245 | 4.69 (1.09)    | 81 | 4.96 (1.1)     | -0.28 ± 0.14*  |
| CCI-all education <sup>a</sup>                 | 247 | 4.76 (1.07)    | 186 | 4.68 (1.03)    | 61 | 4.99 (1.15)    | -0.31 ± 0.17   |
| CCI-web <sup>a</sup>                           | 120 | 4.78 (1.1)     | 88  | 4.59 (1.06)    | 32 | 5.3 (1.07)     | -0.72 ± 0.22†  |
| CCI-onsite <sup>a</sup>                        | 127 | 4.73 (1.03)    | 98  | 4.76 (1.0)     | 29 | 4.65 (1.16)    | 0.11 ± 0.24    |
| Usual care <sup>a</sup>                        | 79  | 4.76 (1.19)    | 59  | 4.72 (1.26)    | 20 | 4.88 (0.93)    | -0.16 ± 0.27   |
| CCI-web vs. CCI-onsite <sup>b</sup>            |     | 0.04 ± 0.14    |     | -0.17 ± 0.15   |    | 0.66 ± 0.29*   |                |
| CCI-web vs. usual care <sup>b</sup>            |     | 0.02 ± 0.17    |     | -0.13 ± 0.2    |    | 0.42 ± 0.28    |                |
| CCI-onsite vs. usual care <sup>b</sup>         |     | -0.03 ± 0.16   |     | 0.04 ± 0.19    |    | -0.24 ± 0.3    |                |
| CCI-all vs. usual care <sup>b</sup>            |     | -0.0 ± 0.15    |     | -0.04 ± 0.18   |    | 0.11 ± 0.26    |                |
| <b>LDL-cholesterol (mmol·L<sup>-1</sup>)</b>   |     |                |     |                |    |                |                |
| All                                            | 302 | 102.27 (33.62) | 220 | 100.15 (33.71) | 82 | 107.99 (32.89) | -7.84 ± 4.28   |
| CCI-all education <sup>a</sup>                 | 232 | 102.51 (32.89) | 172 | 100.08 (32.56) | 60 | 109.47 (33.13) | -9.39 ± 4.94   |
| CCI-web <sup>a</sup>                           | 115 | 103.08 (35.61) | 83  | 97.14 (35.58)  | 32 | 118.47 (31.22) | -21.32 ± 6.76† |
| CCI-onsite <sup>a</sup>                        | 117 | 101.95 (30.13) | 89  | 102.82 (29.4)  | 28 | 99.18 (32.75)  | 3.64 ± 6.93    |
| Usual care <sup>a</sup>                        | 70  | 101.50 (36.16) | 48  | 100.38 (37.93) | 22 | 103.95 (32.67) | -3.58 ± 8.86   |
| CCI-web vs. CCI-onsite <sup>b</sup>            |     | 1.13 ± 4.33    |     | -5.68 ± 5.00   |    | 19.29 ± 8.29*  |                |
| CCI-web vs. usual care <sup>b</sup>            |     | 1.58 ± 5.45    |     | -3.23 ± 6.72   |    | 14.51 ± 8.89   |                |
| CCI-onsite vs. usual care <sup>b</sup>         |     | 0.45 ± 5.14    |     | 2.45 ± 6.30    |    | -4.78 ± 9.32   |                |
| CCI-all vs. usual care <sup>b</sup>            |     | 1.01 ± 4.83    |     | -0.29 ± 6.01   |    | 5.51 ± 8.17    |                |

**Apo B (g·L<sup>-1</sup>)**

|                                        |     |              |     |              |    |                          |                           |
|----------------------------------------|-----|--------------|-----|--------------|----|--------------------------|---------------------------|
| All                                    | 327 | 1.06 (0.29)  | 245 | 1.04 (0.28)  | 82 | 1.1 (0.29)               | -0.06 ± 0.04              |
| CCI-all education <sup>a</sup>         | 248 | 1.05 (0.29)  | 186 | 1.03 (0.28)  | 62 | 1.1 (0.31)               | -0.06 ± 0.04              |
| CCI-web <sup>a</sup>                   | 120 | 1.08 (0.3)   | 88  | 1.03 (0.29)  | 32 | 1.21 (0.3)               | -0.18 ± 0.06 <sup>†</sup> |
| CCI-onsite <sup>a</sup>                | 128 | 1.02 (0.27)  | 98  | 1.04 (0.27)  | 30 | 0.97 (0.26)              | 0.06 ± 0.06               |
| Usual care <sup>a</sup>                | 79  | 1.07 (0.28)  | 59  | 1.06 (0.3)   | 20 | 1.11 (0.24)              | -0.05 ± 0.07              |
| CCI-web vs. CCI-onsite <sup>b</sup>    |     | 0.06 ± 0.04  |     | -0.01 ± 0.04 |    | 0.24 ± 0.07 <sup>‡</sup> |                           |
| CCI-web vs. usual care <sup>b</sup>    |     | 0.01 ± 0.04  |     | -0.03 ± 0.05 |    | 0.11 ± 0.08              |                           |
| CCI-onsite vs. usual care <sup>b</sup> |     | -0.05 ± 0.04 |     | -0.02 ± 0.05 |    | -0.13 ± 0.07             |                           |
| CCI-all vs. usual care <sup>b</sup>    |     | -0.02 ± 0.04 |     | -0.02 ± 0.04 |    | -0.01 ± 0.07             |                           |

**HDL-C (mmol·L<sup>-1</sup>)**

|                                        |     |                          |     |                          |    |             |              |
|----------------------------------------|-----|--------------------------|-----|--------------------------|----|-------------|--------------|
| All                                    | 326 | 1.06 (0.34)              | 245 | 1.06 (0.35)              | 81 | 1.06 (0.31) | 0.0 ± 0.04   |
| CCI-all education <sup>a</sup>         | 247 | 1.09 (0.35)              | 186 | 1.1 (0.36)               | 61 | 1.08 (0.32) | 0.02 ± 0.05  |
| CCI-web <sup>a</sup>                   | 120 | 1.1 (0.33)               | 88  | 1.1 (0.36)               | 32 | 1.1 (0.24)  | -0.0 ± 0.06  |
| CCI-onsite <sup>a</sup>                | 127 | 1.09 (0.36)              | 98  | 1.1 (0.36)               | 29 | 1.05 (0.39) | 0.04 ± 0.08  |
| Usual care <sup>a</sup>                | 79  | 0.97 (0.29)              | 59  | 0.96 (0.29)              | 20 | 1.02 (0.29) | -0.06 ± 0.08 |
| CCI-web vs. CCI-onsite <sup>b</sup>    |     | 0.01 ± 0.04              |     | 0.0 ± 0.05               |    | 0.05 ± 0.08 |              |
| CCI-web vs. usual care <sup>b</sup>    |     | 0.12 ± 0.04 <sup>†</sup> |     | 0.14 ± 0.05              |    | 0.08 ± 0.08 |              |
| CCI-onsite vs. usual care <sup>b</sup> |     | 0.11 ± 0.05 <sup>*</sup> |     | 0.14 ± 0.05 <sup>†</sup> |    | 0.04 ± 0.1  |              |
| CCI-all vs. usual care <sup>b</sup>    |     | 0.12 ± 0.04 <sup>†</sup> |     | 0.14 ± 0.05 <sup>†</sup> |    | 0.06 ± 0.08 |              |

**Triglycerides (mmol·L<sup>-1</sup>)**

|                                        |     |                           |     |              |    |                           |             |
|----------------------------------------|-----|---------------------------|-----|--------------|----|---------------------------|-------------|
| All                                    | 326 | 2.46 (2.66)               | 245 | 2.53 (2.97)  | 81 | 2.26 (1.35)               | 0.27 ± 0.24 |
| CCI-all education <sup>a</sup>         | 247 | 2.23 (1.62)               | 186 | 2.27 (1.73)  | 61 | 2.11 (1.25)               | 0.15 ± 0.2  |
| CCI-web <sup>a</sup>                   | 120 | 2.14 (1.17)               | 88  | 2.16 (1.2)   | 32 | 2.1 (1.1)                 | 0.06 ± 0.23 |
| CCI-onsite <sup>a</sup>                | 127 | 2.31 (1.95)               | 98  | 2.36 (2.09)  | 29 | 2.13 (1.41)               | 0.23 ± 0.34 |
| Usual care <sup>a</sup>                | 79  | 3.2 (4.53)                | 59  | 3.36 (5.17)  | 20 | 2.72 (1.56)               | 0.64 ± 0.76 |
| CCI-web vs. CCI-onsite <sup>b</sup>    |     | -0.16 ± 0.2               |     | -0.2 ± 0.25  |    | -0.03 ± 0.33              |             |
| CCI-web vs. usual care <sup>b</sup>    |     | -1.05 ± 0.52 <sup>*</sup> |     | -1.2 ± 0.69  |    | -0.62 ± 0.4               |             |
| CCI-onsite vs. usual care <sup>b</sup> |     | -0.89 ± 0.54 <sup>*</sup> |     | -1.0 ± 0.71  |    | -0.59 ± 0.44              |             |
| CCI-all vs. usual care <sup>b</sup>    |     | -0.97 ± 0.52 <sup>*</sup> |     | -1.09 ± 0.68 |    | -0.61 ± 0.38 <sup>*</sup> |             |

**Total/HDL-cholesterol**

|                                |     |             |     |             |    |             |              |
|--------------------------------|-----|-------------|-----|-------------|----|-------------|--------------|
| All                            | 326 | 4.88 (1.92) | 245 | 4.84 (2.0)  | 81 | 4.99 (1.66) | -0.15 ± 0.22 |
| CCI-all education <sup>a</sup> | 247 | 4.72 (1.7)  | 186 | 4.65 (1.72) | 61 | 4.93 (1.65) | -0.28 ± 0.25 |
| CCI-web <sup>a</sup>           | 120 | 4.68 (1.54) | 88  | 4.55 (1.58) | 32 | 5.02 (1.36) | -0.47 ± 0.29 |
| CCI-onsite <sup>a</sup>        | 127 | 4.76 (1.85) | 98  | 4.74 (1.83) | 29 | 4.84 (1.94) | -0.1 ± 0.41  |

|                                                   |     |                |     |                |    |                |               |
|---------------------------------------------------|-----|----------------|-----|----------------|----|----------------|---------------|
| Usual care <sup>a</sup>                           | 79  | 5.37 (2.42)    | 59  | 5.44 (2.63)    | 20 | 5.17 (1.72)    | 0.27 ± 0.52   |
| CCI-web vs. CCI-onsite <sup>b</sup>               |     | -0.08 ± 0.22   |     | -0.19 ± 0.25   |    | 0.19 ± 0.43    |               |
| CCI-web vs. usual care <sup>b</sup>               |     | -0.69 ± 0.31*  |     | -0.88 ± 0.38*  |    | -0.15 ± 0.45   |               |
| CCI-onsite vs. usual care <sup>b</sup>            |     | -0.61 ± 0.32   |     | -0.7 ± 0.39    |    | -0.33 ± 0.53   |               |
| CCI-all vs. usual care <sup>b</sup>               |     | -0.65 ± 0.29*  |     | -0.79 ± 0.36*  |    | -0.24 ± 0.44   |               |
| <b>hsC-reactive protein (nmol·L<sup>-1</sup>)</b> |     |                |     |                |    |                |               |
| All                                               | 334 | 82.19 (126.1)  | 263 | 86.0 (138.29)  | 71 | 68.29 (61.81)  | 17.71 ± 11.24 |
| CCI-all education <sup>a</sup>                    | 249 | 81.33 (138.0)  | 193 | 85.62 (153.05) | 56 | 66.76 (62.1)   | 18.86 ± 13.81 |
| CCI-web <sup>a</sup>                              | 126 | 89.43 (183.72) | 98  | 98.38 (98.38)  | 28 | 58.1 (58.1)    | 40.29 ± 22.1  |
| CCI-onsite <sup>a</sup>                           | 123 | 73.14 (63.53)  | 95  | 72.38 (72.38)  | 28 | 75.43 (75.43)  | -3.05 ± 16.1  |
| Usual care <sup>a</sup>                           | 85  | 84.67 (82.1)   | 70  | 86.95 (86.95)  | 15 | 73.81 (73.81)  | 13.14 ± 19.14 |
| CCI-web vs. CCI-onsite <sup>b</sup>               |     | 16.29 ± 17.33  |     | 25.91 ± 21.71  |    | -17.33 ± 16.57 |               |
| CCI-web vs. usual care <sup>b</sup>               |     | 4.76 ± 18.67   |     | 11.43 ± 23.24  |    | -15.71 ± 17.71 |               |
| CCI-onsite vs. usual care <sup>b</sup>            |     | -11.52 ± 10.57 |     | -14.57 ± 11.9  |    | 1.62 ± 22.0    |               |
| CCI-all vs. usual care <sup>b</sup>               |     | -3.24 ± 12.48  |     | -1.33 ± 15.05  |    | -7.05 ± 18.19  |               |
| <b>ALT (μkat·L<sup>-1</sup>)</b>                  |     |                |     |                |    |                |               |
| All                                               | 343 | 0.5 (0.37)     | 272 | 0.51 (0.39)    | 71 | 0.48 (0.27)    | 0.03 ± 0.04   |
| CCI-all education <sup>a</sup>                    | 257 | 0.51 (0.38)    | 201 | 0.52 (0.41)    | 56 | 0.47 (0.27)    | 0.05 ± 0.05   |
| CCI-web <sup>a</sup>                              | 123 | 0.53 (0.3)     | 97  | 0.56 (0.31)    | 26 | 0.45 (0.27)    | 0.11 ± 0.06   |
| CCI-onsite <sup>a</sup>                           | 134 | 0.49 (0.44)    | 104 | 0.49 (0.48)    | 30 | 0.49 (0.27)    | 0.0 ± 0.07    |
| Usual care <sup>a</sup>                           | 86  | 0.46 (0.33)    | 71  | 0.45 (0.34)    | 15 | 0.51 (0.29)    | -0.05 ± 0.09  |
| CCI-web vs. CCI-onsite <sup>b</sup>               |     | 0.04 ± 0.05    |     | 0.06 ± 0.06    |    | -0.04 ± 0.07   |               |
| CCI-web vs. usual care <sup>b</sup>               |     | 0.07 ± 0.04    |     | 0.1 ± 0.05*    |    | -0.06 ± 0.09   |               |
| CCI-onsite vs. usual care <sup>b</sup>            |     | 0.03 ± 0.05    |     | 0.04 ± 0.06    |    | -0.02 ± 0.09   |               |
| CCI-all vs. usual care <sup>b</sup>               |     | 0.05 ± 0.04    |     | 0.07 ± 0.05    |    | -0.04 ± 0.08   |               |
| <b>AST (μkat·L<sup>-1</sup>)</b>                  |     |                |     |                |    |                |               |
| All                                               | 343 | 0.4 (0.27)     | 272 | 0.4 (0.3)      | 71 | 0.37 (0.15)    | 0.03 ± 0.03   |
| CCI-all education <sup>a</sup>                    | 257 | 0.4 (0.25)     | 201 | 0.41 (0.28)    | 56 | 0.36 (0.15)    | 0.04 ± 0.03   |
| CCI-web <sup>a</sup>                              | 123 | 0.42 (0.27)    | 97  | 0.44 (0.29)    | 26 | 0.35 (0.17)    | 0.09 ± 0.04   |
| CCI-onsite <sup>a</sup>                           | 134 | 0.37 (0.24)    | 104 | 0.37 (0.26)    | 30 | 0.37 (0.14)    | 0.0 ± 0.04    |
| Usual care <sup>a</sup>                           | 86  | 0.4 (0.32)     | 71  | 0.39 (0.35)    | 15 | 0.42 (0.16)    | -0.03 ± 0.06  |
| CCI-web vs. CCI-onsite <sup>b</sup>               |     | 0.05 ± 0.03    |     | 0.07 ± 0.04    |    | -0.02 ± 0.04   |               |
| CCI-web vs. usual care <sup>b</sup>               |     | 0.02 ± 0.04    |     | 0.05 ± 0.05    |    | -0.07 ± 0.05   |               |
| CCI-onsite vs. usual care <sup>b</sup>            |     | -0.03 ± 0.04   |     | -0.02 ± 0.05   |    | -0.05 ± 0.05   |               |
| CCI-all vs. usual care <sup>b</sup>               |     | -0.0 ± 0.04    |     | 0.01 ± 0.05    |    | -0.06 ± 0.05   |               |

**Alkaline phosphatase ( $\mu\text{kat}\cdot\text{L}^{-1}$ )**

|                                        |     |                  |     |                  |    |                  |                  |
|----------------------------------------|-----|------------------|-----|------------------|----|------------------|------------------|
| All                                    | 342 | 1.25 (0.39)      | 271 | 1.26 (0.4)       | 71 | 1.23 (0.36)      | 0.03 $\pm$ 0.05  |
| CCI-all education <sup>a</sup>         | 256 | 1.24 (0.37)      | 200 | 1.24 (0.37)      | 56 | 1.23 (0.36)      | 0.01 $\pm$ 0.05  |
| CCI-web <sup>a</sup>                   | 123 | 1.22 (0.39)      | 97  | 1.23 (0.4)       | 26 | 1.19 (0.33)      | 0.04 $\pm$ 0.08  |
| CCI-onsite <sup>a</sup>                | 133 | 1.25 (0.36)      | 103 | 1.25 (0.35)      | 30 | 1.27 (0.39)      | -0.02 $\pm$ 0.08 |
| Usual care <sup>a</sup>                | 86  | 1.29 (0.44)      | 71  | 1.31 (0.45)      | 15 | 1.22 (0.38)      | 0.09 $\pm$ 0.11  |
| CCI-web vs. CCI-onsite <sup>b</sup>    |     | -0.03 $\pm$ 0.05 |     | -0.02 $\pm$ 0.05 |    | -0.08 $\pm$ 0.1  |                  |
| CCI-web vs. usual care <sup>b</sup>    |     | -0.07 $\pm$ 0.06 |     | -0.08 $\pm$ 0.07 |    | -0.03 $\pm$ 0.12 |                  |
| CCI-onsite vs. usual care <sup>b</sup> |     | -0.04 $\pm$ 0.06 |     | -0.06 $\pm$ 0.06 |    | 0.05 $\pm$ 0.12  |                  |
| CCI-all vs. usual care <sup>b</sup>    |     | -0.05 $\pm$ 0.05 |     | -0.07 $\pm$ 0.06 |    | 0.01 $\pm$ 0.11  |                  |

**Serum creatinine ( $\mu\text{mol}\cdot\text{L}^{-1}$ )**

|                                        |     |                  |     |                  |    |                   |                  |
|----------------------------------------|-----|------------------|-----|------------------|----|-------------------|------------------|
| All                                    | 344 | 78.68 (21.22)    | 273 | 77.79 (20.33)    | 71 | 82.21 (24.75)     | -4.42 $\pm$ 3.54 |
| CCI-all education <sup>a</sup>         | 258 | 77.79 (21.22)    | 202 | 77.79 (20.33)    | 56 | 81.33 (24.75)     | -3.54 $\pm$ 3.54 |
| CCI-web <sup>a</sup>                   | 123 | 76.91 (17.68)    | 97  | 76.91 (18.56)    | 26 | 76.02 (15.91)     | 0.88 $\pm$ 3.54  |
| CCI-onsite <sup>a</sup>                | 135 | 79.56 (23.87)    | 105 | 77.79 (21.22)    | 30 | 85.75 (29.17)     | -7.96 $\pm$ 6.19 |
| Usual care <sup>a</sup>                | 86  | 80.44 (22.1)     | 71  | 78.68 (20.33)    | 15 | 86.63 (25.64)     | -7.07 $\pm$ 7.07 |
| CCI-web vs. CCI-onsite <sup>b</sup>    |     | -2.65 $\pm$ 2.65 |     | -0.88 $\pm$ 2.65 |    | -10.61 $\pm$ 6.19 |                  |
| CCI-web vs. usual care <sup>b</sup>    |     | -3.54 $\pm$ 2.65 |     | -1.77 $\pm$ 2.65 |    | -10.61 $\pm$ 7.07 |                  |
| CCI-onsite vs. usual care <sup>b</sup> |     | -0.88 $\pm$ 3.54 |     | -0.88 $\pm$ 3.54 |    | 0.0 $\pm$ 8.84    |                  |
| CCI-all vs. usual care <sup>b</sup>    |     | -1.77 $\pm$ 2.65 |     | -1.77 $\pm$ 2.65 |    | -5.3 $\pm$ 7.07   |                  |

**BUN ( $\text{mmol}\cdot\text{L}^{-1}$ )**

|                                        |     |                  |     |                  |    |                  |                              |
|----------------------------------------|-----|------------------|-----|------------------|----|------------------|------------------------------|
| All                                    | 344 | 5.95 (2.31)      | 273 | 5.94 (2.08)      | 71 | 6.0 (3.06)       | -0.06 $\pm$ 0.39             |
| CCI-all education <sup>a</sup>         | 258 | 6.03 (2.34)      | 202 | 6.06 (2.15)      | 56 | 5.9 (2.96)       | 0.16 $\pm$ 0.42              |
| CCI-web <sup>a</sup>                   | 123 | 6.02 (1.71)      | 97  | 6.17 (1.81)      | 26 | 5.42 (1.14)      | 0.75 $\pm$ 0.29 <sup>†</sup> |
| CCI-onsite <sup>a</sup>                | 135 | 6.04 (2.8)       | 105 | 5.96 (2.42)      | 30 | 6.32 (3.88)      | -0.36 $\pm$ 0.75             |
| Usual care <sup>a</sup>                | 86  | 5.73 (2.23)      | 71  | 5.59 (1.86)      | 15 | 6.38 (3.52)      | -0.79 $\pm$ 0.94             |
| CCI-web vs. CCI-onsite <sup>b</sup>    |     | -0.02 $\pm$ 0.29 |     | 0.21 $\pm$ 0.3   |    | -0.9 $\pm$ 0.74  |                              |
| CCI-web vs. usual care <sup>b</sup>    |     | 0.29 $\pm$ 0.29  |     | 0.58 $\pm$ 0.29* |    | -0.95 $\pm$ 0.94 |                              |
| CCI-onsite vs. usual care <sup>b</sup> |     | 0.31 $\pm$ 0.34  |     | 0.37 $\pm$ 0.32  |    | -0.06 $\pm$ 1.15 |                              |
| CCI-all vs. usual care <sup>b</sup>    |     | 0.3 $\pm$ 0.28   |     | 0.47 $\pm$ 0.27  |    | -0.47 $\pm$ 0.99 |                              |

**eGFR ( $\text{mL}\cdot\text{s}^{-1}\cdot\text{m}^{-2}$ )**

|                                |     |             |     |             |    |             |                 |
|--------------------------------|-----|-------------|-----|-------------|----|-------------|-----------------|
| All                            | 344 | 1.34 (0.23) | 273 | 1.34 (0.22) | 71 | 1.31 (0.26) | 0.03 $\pm$ 0.03 |
| CCI-all education <sup>a</sup> | 258 | 1.34 (0.23) | 202 | 1.35 (0.22) | 56 | 1.33 (0.25) | 0.02 $\pm$ 0.04 |
| CCI-web <sup>a</sup>           | 123 | 1.36 (0.21) | 97  | 1.37 (0.2)  | 26 | 1.35 (0.23) | 0.02 $\pm$ 0.05 |
| CCI-onsite <sup>a</sup>        | 135 | 1.33 (0.24) | 105 | 1.33 (0.24) | 30 | 1.32 (0.26) | 0.01 $\pm$ 0.05 |

|                                             |     |                |     |                |    |                |                |
|---------------------------------------------|-----|----------------|-----|----------------|----|----------------|----------------|
| Usual care <sup>a</sup>                     | 86  | 1.32 (0.23)    | 71  | 1.34 (0.22)    | 15 | 1.26 (0.28)    | 0.08 ± 0.08    |
| CCI-web vs. CCI-onsite <sup>b</sup>         |     | 0.04 ± 0.05    |     | 0.04 ± 0.03    |    | 0.03 ± 0.07    |                |
| CCI-web vs. usual care <sup>b</sup>         |     | 0.04 ± 0.03    |     | 0.03 ± 0.03    |    | 0.09 ± 0.09    |                |
| CCI-onsite vs. usual care <sup>b</sup>      |     | 0.0 ± 0.03     |     | -0.01 (0.01)   |    | 0.06 ± 0.09    |                |
| CCI-all vs. usual care <sup>b</sup>         |     | 0.02 ± 0.03    |     | 0.02 ± 0.03    |    | 0.03 ± 0.08    |                |
| <b>Anion gap (mmol·L<sup>-1</sup>)</b>      |     |                |     |                |    |                |                |
| All                                         | 343 | 6.86 (1.7)     | 272 | 6.82 (1.73)    | 71 | 6.99 (1.6)     | -0.16 ± 0.22   |
| CCI-all education <sup>a</sup>              | 257 | 6.83 (1.67)    | 201 | 6.79 (1.7)     | 56 | 6.98 (1.53)    | -0.19 ± 0.24   |
| CCI-web <sup>a</sup>                        | 123 | 6.93 (1.71)    | 97  | 6.97 (1.66)    | 26 | 6.77 (1.92)    | 0.2 ± 0.41     |
| CCI-onsite <sup>a</sup>                     | 134 | 6.75 (1.63)    | 104 | 6.63 (1.74)    | 30 | 7.17 (1.09)    | -0.54 ± 0.26*  |
| Usual care <sup>a</sup>                     | 86  | 6.93 (1.82)    | 71  | 6.92 (1.82)    | 15 | 7.0 (1.89)     | -0.08 ± 0.53   |
| CCI-web vs. CCI-onsite <sup>b</sup>         |     | 0.18 ± 0.21    |     | 0.34 ± 0.24    |    | -0.4 ± 0.43    |                |
| CCI-web vs. usual care <sup>b</sup>         |     | 0.0 ± 0.25     |     | 0.05 ± 0.27    |    | -0.23 ± 0.62   |                |
| CCI-onsite vs. usual care <sup>b</sup>      |     | -0.18 ± 0.24   |     | -0.29 ± 0.27   |    | 0.17 ± 0.53    |                |
| CCI-all vs. usual care <sup>b</sup>         |     | -0.1 ± 0.22    |     | -0.12 ± 0.25   |    | -0.02 ± 0.53   |                |
| <b>CO<sub>2</sub> (mmol·L<sup>-1</sup>)</b> |     |                |     |                |    |                |                |
| All                                         | 344 | 27.86 (2.65)   | 273 | 27.97 (2.58)   | 71 | 27.42 (2.91)   | 0.55 ± 0.38    |
| CCI-all education <sup>a</sup>              | 258 | 27.78 (2.55)   | 202 | 27.95 (2.37)   | 56 | 27.18 (3.06)   | 0.77 ± 0.44    |
| CCI-web <sup>a</sup>                        | 123 | 27.9 (2.37)    | 97  | 27.97 (2.15)   | 26 | 27.65 (3.1)    | 0.32 ± 0.65    |
| CCI-onsite <sup>a</sup>                     | 135 | 27.67 (2.7)    | 105 | 27.92 (2.56)   | 30 | 26.77 (3.01)   | 1.16 ± 0.6     |
| Usual care <sup>a</sup>                     | 86  | 28.1 (2.95)    | 71  | 28.06 (3.11)   | 15 | 28.33 (2.09)   | -0.28 ± 0.65   |
| CCI-web vs. CCI-onsite <sup>b</sup>         |     | 0.24 ± 0.32    |     | 0.05 ± 0.33    |    | 0.89 ± 0.82    |                |
| CCI-web vs. usual care <sup>b</sup>         |     | -0.2 ± 0.38    |     | -0.09 ± 0.43   |    | -0.68 ± 0.81   |                |
| CCI-onsite vs. usual care <sup>b</sup>      |     | -0.44 ± 0.39   |     | -0.13 ± 0.45   |    | -1.57 ± 0.77*  |                |
| CCI-all vs. usual care <sup>b</sup>         |     | -0.33 ± 0.36   |     | -0.11 ± 0.4    |    | -1.15 ± 0.68   |                |
| <b>Uric acid (μmol·L<sup>-1</sup>)</b>      |     |                |     |                |    |                |                |
| All                                         | 346 | 344.42 (86.85) | 273 | 343.82 (86.25) | 73 | 346.2 (91.01)  | -2.38 ± 11.9   |
| CCI-all education <sup>a</sup>              | 261 | 347.99 (86.85) | 202 | 348.58 (86.25) | 59 | 346.2 (89.82)  | 2.38 ± 13.09   |
| CCI-web <sup>a</sup>                        | 126 | 355.13 (87.44) | 98  | 361.07 (89.82) | 28 | 333.71 (77.93) | 27.36 ± 17.25  |
| CCI-onsite <sup>a</sup>                     | 135 | 341.44 (85.66) | 104 | 336.69 (80.9)  | 31 | 357.5 (99.34)  | -20.82 ± 19.63 |
| Usual care <sup>a</sup>                     | 85  | 333.12 (87.44) | 71  | 330.74 (85.66) | 14 | 345.01 (98.75) | -14.28 ± 28.55 |
| CCI-web vs. CCI-onsite <sup>b</sup>         |     | 13.68 ± 10.71  |     | 24.98 ± 11.9   |    | -23.79 ± 23.2  |                |
| CCI-web vs. usual care <sup>b</sup>         |     | 22.01 ± 12.49  |     | 30.34 ± 13.68* |    | -11.3 ± 30.34  |                |
| CCI-onsite vs. usual care <sup>b</sup>      |     | 7.73 ± 11.9    |     | 5.35 ± 13.09*  |    | 12.49 ± 32.12  |                |
| CCI-all vs. usual care <sup>b</sup>         |     | 14.87 ± 10.71  |     | 17.25 ± 11.9   |    | 1.19 ± 29.15   |                |

**TSH (mIU·L<sup>-1</sup>)**

|                                        |     |              |     |             |    |                          |              |
|----------------------------------------|-----|--------------|-----|-------------|----|--------------------------|--------------|
| All                                    | 344 | 2.23 (1.62)  | 270 | 2.25 (1.65) | 74 | 2.17 (1.51)              | 0.08 ± 0.2   |
| CCI-all education <sup>a</sup>         | 259 | 2.32 (1.74)  | 200 | 2.31 (1.79) | 59 | 2.38 (1.55)              | -0.07 ± 0.24 |
| CCI-web <sup>a</sup>                   | 126 | 2.37 (1.91)  | 98  | 2.46 (2.11) | 28 | 2.07 (0.91)              | 0.38 ± 0.27  |
| CCI-onsite <sup>a</sup>                | 133 | 2.28 (1.56)  | 102 | 2.16 (1.42) | 31 | 2.65 (1.93)              | -0.49 ± 0.37 |
| Usual care <sup>a</sup>                | 85  | 1.97 (1.16)  | 70  | 2.09 (1.16) | 15 | 1.38 (1.03)              | 0.71 ± 0.3*  |
| CCI-web vs. CCI-onsite <sup>b</sup>    |     | 0.09 ± 0.22  |     | 0.29 ± 0.26 |    | -0.58 ± 0.39             |              |
| CCI-web vs. usual care <sup>b</sup>    |     | 0.4 ± 0.21   |     | 0.36 ± 0.25 |    | 0.69 ± 0.32              |              |
| CCI-onsite vs. usual care <sup>b</sup> |     | 0.31 ± 0.19  |     | 0.07 ± 0.2  |    | 1.27 ± 0.44 <sup>†</sup> |              |
| CCI-all vs. usual care <sup>b</sup>    |     | 0.36 ± 0.17* |     | 0.21 ± 0.19 |    | 1.0 ± 0.33 <sup>†</sup>  |              |

**Free T4 (pmol·L<sup>-1</sup>)**

|                                        |     |              |     |              |    |              |              |
|----------------------------------------|-----|--------------|-----|--------------|----|--------------|--------------|
| All                                    | 346 | 11.71 (2.7)  | 273 | 11.71 (2.83) | 73 | 11.46 (2.19) | 0.26 ± 0.26  |
| CCI-all education <sup>a</sup>         | 260 | 11.84 (2.19) | 202 | 11.84 (2.32) | 58 | 11.58 (2.19) | 0.26 ± 0.39  |
| CCI-web <sup>a</sup>                   | 125 | 11.84 (2.06) | 98  | 11.84 (1.93) | 27 | 12.1 (2.06)  | -0.26 ± 0.51 |
| CCI-onsite <sup>a</sup>                | 135 | 11.84 (2.45) | 104 | 11.97 (2.57) | 31 | 11.2 (2.19)  | 0.77 ± 0.51  |
| Usual care <sup>a</sup>                | 86  | 11.33 (3.73) | 71  | 11.33 (3.86) | 15 | 10.94 (2.32) | 0.39 ± 0.77  |
| CCI-web vs. CCI-onsite <sup>b</sup>    |     | 0.0 ± 0.26   |     | -0.26 ± 0.26 |    | 0.77 ± 0.51  |              |
| CCI-web vs. usual care <sup>b</sup>    |     | 0.51 ± 0.39  |     | 0.51 ± 0.51  |    | 1.03 ± 0.77  |              |
| CCI-onsite vs. usual care <sup>b</sup> |     | 0.51 ± 0.39  |     | 0.64 ± 0.51  |    | 0.26 ± 0.77  |              |
| CCI-all vs. usual care <sup>b</sup>    |     | 0.51 ± 0.39  |     | 0.51 ± 0.51  |    | 0.64 ± 0.64  |              |

**Any diabetes medication, excluding metformin (%)**

|                                        |     |               |     |                |    |               |                             |
|----------------------------------------|-----|---------------|-----|----------------|----|---------------|-----------------------------|
| All                                    | 349 | 59.31 ± 2.63  | 291 | 58.76 ± 2.89   | 58 | 60.07 ± 6.37  | -3.31 ± 6.99                |
| CCI-all education <sup>a</sup>         | 262 | 56.87 ± 3.06  | 218 | 55.50 ± 3.37   | 44 | 63.64 ± 7.25  | -8.13 ± 8.00                |
| CCI-web <sup>a</sup>                   | 126 | 57.14 ± 4.41  | 104 | 56.73 ± 4.86   | 22 | 59.09 ± 10.48 | -2.36 ± 11.55               |
| CCI-onsite <sup>a</sup>                | 136 | 56.62 ± 4.25  | 114 | 54.39 ± 4.66   | 22 | 68.18 ± 9.93  | -13.80 ± 10.97 <sup>†</sup> |
| Usual care <sup>a</sup>                | 87  | 66.67 ± 5.05  | 73  | 68.49 ± 5.44   | 14 | 57.14 ± 13.23 | 11.35 ± 14.32               |
| CCI-web vs. CCI-onsite <sup>b</sup>    |     | 0.53 ± 6.12   |     | 2.34 ± 6.74    |    | -9.09 ± 14.44 |                             |
| CCI-web vs. usual care <sup>b</sup>    |     | -9.52 ± 6.71  |     | -11.76 ± 7.29  |    | 1.95 ± 16.88  |                             |
| CCI-onsite vs. usual care <sup>b</sup> |     | -10.05 ± 6.60 |     | -14.11 ± 7.16* |    | 11.04 ± 16.54 |                             |
| CCI-all vs. usual care <sup>b</sup>    |     | -9.80 ± 5.91  |     | -12.99 ± 6.39* |    | 6.49 ± 15.08  |                             |

**Sulfonylurea (%)**

|                                |     |              |     |              |    |              |               |
|--------------------------------|-----|--------------|-----|--------------|----|--------------|---------------|
| All                            | 349 | 23.78 ± 2.28 | 291 | 24.05 ± 2.51 | 58 | 22.41 ± 5.48 | 1.64 ± 6.02   |
| CCI-all education <sup>a</sup> | 262 | 23.66 ± 2.63 | 218 | 24.31 ± 2.91 | 44 | 20.45 ± 6.08 | 3.86 ± 6.74   |
| CCI-web <sup>a</sup>           | 126 | 23.81 ± 3.79 | 104 | 25.96 ± 4.3  | 22 | 13.64 ± 7.32 | 12.33 ± 8.49  |
| CCI-onsite <sup>a</sup>        | 136 | 23.53 ± 3.64 | 114 | 22.81 ± 3.93 | 22 | 27.27 ± 9.5  | -4.47 ± 10.28 |

|                                        |     |                |     |                |    |                |                |
|----------------------------------------|-----|----------------|-----|----------------|----|----------------|----------------|
| Usual care <sup>a</sup>                | 87  | 24.14 ± 4.59   | 73  | 23.29 ± 4.95   | 14 | 28.57 ± 12.07  | -5.28 ± 13.05  |
| CCI-web vs. CCI-onsite <sup>b</sup>    |     | 0.28 ± 5.26    |     | 3.15 ± 5.82    |    | -13.64 ± 11.99 |                |
| CCI-web vs. usual care <sup>b</sup>    |     | -0.33 ± 5.95   |     | 2.67 ± 6.55    |    | -14.94 ± 14.12 |                |
| CCI-onsite vs. usual care <sup>b</sup> |     | -0.61 ± 5.85   |     | -0.48 ± 6.32   |    | -1.30 ± 15.36  |                |
| CCI-all vs. usual care <sup>b</sup>    |     | -0.48 ± 5.29   |     | 1.02 ± 5.74    |    | -8.12 ± 13.52  |                |
| <b>Insulin (%)</b>                     |     |                |     |                |    |                |                |
| All                                    | 349 | 33.81 ± 2.53   | 296 | 34.12 ± 2.76   | 53 | 32.08 ± 6.41   | 2.04 ± 6.98    |
| CCI-all education <sup>a</sup>         | 262 | 29.77 ± 2.82   | 218 | 28.44 ± 3.06   | 44 | 36.36 ± 7.25   | -7.92 ± 7.87   |
| CCI-web <sup>a</sup>                   | 126 | 28.57 ± 4.02   | 104 | 27.88 ± 4.4    | 22 | 31.82 ± 9.93   | -3.93 ± 10.86  |
| CCI-onsite <sup>a</sup>                | 136 | 30.88 ± 3.96   | 114 | 28.95 ± 4.25   | 22 | 40.91 ± 10.48  | -11.96 ± 11.31 |
| Usual care <sup>a</sup>                | 87  | 45.98 ± 5.34   | 78  | 50.0 ± 5.66    | 9  | 11.11 ± 10.48  | 38.89 (1.91)‡  |
| CCI-web vs. CCI-onsite <sup>b</sup>    |     | -2.31 ± 5.65   |     | -1.06 ± 6.11   |    | -9.09 ± 14.44  |                |
| CCI-web vs. usual care <sup>b</sup>    |     | -17.41 ± 6.69† |     | -22.12 ± 7.17† |    | 20.71 ± 14.43  |                |
| CCI-onsite vs. usual care <sup>b</sup> |     | -15.09 ± 6.65* |     | -21.05 ± 7.08† |    | 29.8 ± 14.82*  |                |
| CCI-all vs. usual care <sup>b</sup>    |     | -16.21 ± 6.04† |     | -21.56 ± 6.43‡ |    | 25.25 ± 12.74* |                |
| <b>Thiazolidinedione (%)</b>           |     |                |     |                |    |                |                |
| All                                    | 349 | 1.43 ± 0.64    | 291 | 1.72 ± 0.76    | 58 | 0.0 ± 0.0      | 1.72 ± 0.76*   |
| CCI-all education <sup>a</sup>         | 262 | 1.53 ± 0.76    | 218 | 1.83 ± 0.91    | 44 | 0.0 ± 0.0      | 1.83 ± 0.91*   |
| CCI-web <sup>a</sup>                   | 126 | 2.38 ± 1.36    | 104 | 2.88 ± 1.64    | 22 | 0.0 ± 0.0      | 2.88 ± 1.64    |
| CCI-onsite <sup>a</sup>                | 136 | 0.74 ± 0.73    | 114 | 0.88 ± 0.87    | 22 | 0.0 ± 0.0      | 0.88 ± 0.87    |
| Usual care <sup>a</sup>                | 87  | 1.15 ± 1.14    | 73  | 1.37 ± 1.36    | 14 | 0.0 ± 0.0      | 1.37 ± 1.36    |
| CCI-web vs. CCI-onsite <sup>b</sup>    |     | 1.65 ± 1.54    |     | 2.01 ± 1.86    |    | 0.0 ± 0.0      |                |
| CCI-web vs. usual care <sup>b</sup>    |     | 1.23 ± 1.78    |     | 1.51 ± 2.13    |    | 0.0 ± 0.0      |                |
| CCI-onsite vs. usual care <sup>b</sup> |     | -0.41 ± 1.36   |     | -0.49 ± 1.62   |    | 0.0 ± 0.0      |                |
| CCI-all vs. usual care <sup>b</sup>    |     | 0.38 ± 1.37    |     | 0.46 ± 1.64    |    | 0.0 ± 0.0      |                |
| <b>SGLT-2 (%)</b>                      |     |                |     |                |    |                |                |
| All                                    | 349 | 11.17 ± 1.69   | 291 | 11.68 ± 1.88   | 58 | 8.62 ± 3.69    | 3.06 ± 4.14    |
| CCI-all education <sup>a</sup>         | 262 | 10.31 ± 1.88   | 218 | 10.55 ± 2.08   | 44 | 9.09 ± 4.33    | 1.46 ± 4.81    |
| CCI-web <sup>a</sup>                   | 126 | 7.14 ± 2.29    | 104 | 7.69 ± 2.61    | 22 | 4.55 ± 4.44    | 3.15 ± 5.15    |
| CCI-onsite <sup>a</sup>                | 136 | 13.24 ± 2.91   | 114 | 13.16 ± 3.17   | 22 | 13.64 ± 7.32   | -0.48 ± 7.97   |
| Usual care <sup>a</sup>                | 87  | 13.79 ± 3.7    | 73  | 15.07 ± 4.19   | 14 | 7.14 ± 6.88    | 7.93 ± 8.06    |
| CCI-web vs. CCI-onsite <sup>b</sup>    |     | -6.09 ± 3.7    |     | -5.47 ± 4.1    |    | -9.09 ± 8.56   |                |
| CCI-web vs. usual care <sup>b</sup>    |     | -6.65 ± 4.35   |     | -7.38 ± 4.94   |    | -2.60 ± 8.19   |                |
| CCI-onsite vs. usual care <sup>b</sup> |     | -0.56 ± 4.7    |     | -1.91 ± 5.25   |    | 6.49 ± 10.05   |                |
| CCI-all vs. usual care <sup>b</sup>    |     | -3.48 ± 4.15   |     | -4.52 ± 4.68   |    | 1.95 ± 8.13*   |                |



**DPP-4 (%)**

|                                        |     |              |     |              |    |              |              |
|----------------------------------------|-----|--------------|-----|--------------|----|--------------|--------------|
| All                                    | 349 | 9.46 ± 1.57  | 291 | 9.62 ± 1.73  | 58 | 8.62 ± 3.69  | 1.00 ± 4.07  |
| CCI-all education <sup>a</sup>         | 262 | 9.92 ± 1.85  | 218 | 10.09 ± 2.04 | 44 | 9.09 ± 4.33  | 1.0 ± 4.79   |
| CCI-web <sup>a</sup>                   | 126 | 10.32 ± 2.71 | 104 | 9.62 ± 2.89  | 22 | 13.64 ± 7.32 | -4.02 ± 7.87 |
| CCI-onsite <sup>a</sup>                | 136 | 9.56 ± 2.52  | 114 | 10.53 ± 2.87 | 22 | 4.55 ± 4.44  | 5.98 ± 5.29  |
| Usual care <sup>a</sup>                | 87  | 8.05 ± 2.92  | 73  | 8.22 ± 3.21  | 14 | 7.14 ± 6.88  | 1.08 ± 7.60  |
| CCI-web vs. CCI-onsite <sup>b</sup>    |     | 0.76 ± 3.7   |     | -0.91 ± 4.08 |    | 9.09 ± 8.56  |              |
| CCI-web vs. usual care <sup>b</sup>    |     | 2.27 ± 3.98  |     | 1.40 ± 4.32  |    | 6.49 ± 10.05 |              |
| CCI-onsite vs. usual care <sup>b</sup> |     | 1.51 ± 3.85  |     | 2.31 ± 4.31  |    | -2.60 ± 8.19 |              |
| CCI-all vs. usual care <sup>b</sup>    |     | 1.87 ± 3.45  |     | 1.87 ± 3.81  |    | 1.95 ± 8.13  |              |

**GLP-1 (%)**

|                                        |     |              |     |              |    |               |              |
|----------------------------------------|-----|--------------|-----|--------------|----|---------------|--------------|
| All                                    | 349 | 13.75 ± 1.84 | 291 | 13.75 ± 2.02 | 58 | 13.79 ± 4.53  | -0.05 ± 4.96 |
| CCI-all education <sup>a</sup>         | 262 | 13.36 ± 2.1  | 218 | 12.84 ± 2.27 | 44 | 15.91 ± 5.51  | -3.07 ± 5.96 |
| CCI-web <sup>a</sup>                   | 126 | 12.7 ± 2.97  | 104 | 11.54 ± 3.13 | 22 | 18.18 ± 8.22  | -6.64 ± 8.8  |
| CCI-onsite <sup>a</sup>                | 136 | 13.97 ± 2.97 | 114 | 14.04 ± 3.25 | 22 | 13.64 ± 7.32  | 0.4 ± 8.01   |
| Usual care <sup>a</sup>                | 87  | 14.94 ± 3.82 | 73  | 16.44 ± 4.34 | 14 | 7.14 ± 6.88   | 9.30 ± 8.14  |
| CCI-web vs. CCI-onsite <sup>b</sup>    |     | -1.27 ± 4.2  |     | -2.5 ± 4.52  |    | 4.55 ± 11.01  |              |
| CCI-web vs. usual care <sup>b</sup>    |     | -2.24 ± 4.84 |     | -4.90 ± 5.35 |    | 11.04 ± 10.72 |              |
| CCI-onsite vs. usual care <sup>b</sup> |     | -0.97 ± 4.84 |     | -2.40 ± 5.42 |    | 6.49 ± 10.05  |              |
| CCI-all vs. usual care <sup>b</sup>    |     | -1.58 ± 4.36 |     | -3.59 ± 4.89 |    | 8.77 ± 8.82   |              |

**Metformin (%)**

|                                        |     |              |     |              |    |               |              |
|----------------------------------------|-----|--------------|-----|--------------|----|---------------|--------------|
| All                                    | 349 | 68.77 ± 2.48 | 291 | 69.07 ± 2.71 | 58 | 67.24 ± 6.16  | 1.83 ± 6.73  |
| CCI-all education <sup>a</sup>         | 262 | 71.37 ± 2.79 | 218 | 71.56 ± 3.06 | 44 | 70.45 ± 6.88  | 1.11 ± 7.53  |
| CCI-web <sup>a</sup>                   | 126 | 69.84 ± 4.09 | 104 | 71.15 ± 4.44 | 22 | 63.64 ± 10.26 | 7.52 ± 11.18 |
| CCI-onsite <sup>a</sup>                | 136 | 72.79 ± 3.82 | 114 | 71.93 ± 4.21 | 22 | 77.27 ± 8.93  | -5.34 ± 9.88 |
| Usual care <sup>a</sup>                | 87  | 60.92 ± 5.23 | 73  | 61.64 ± 5.69 | 14 | 57.14 ± 13.23 | 4.50 ± 14.40 |
| CCI-web vs. CCI-onsite <sup>b</sup>    |     | -2.95 ± 5.59 |     | -0.78 ± 6.12 |    | -13.64 ± 13.6 |              |
| CCI-web vs. usual care <sup>b</sup>    |     | 8.92 ± 6.64  |     | 9.51 ± 7.22  |    | 6.49 ± 16.74  |              |
| CCI-onsite vs. usual care <sup>b</sup> |     | 11.87 ± 6.48 |     | 10.29 ± 7.08 |    | 20.13 ± 15.96 |              |
| CCI-all vs. usual care <sup>b</sup>    |     | 10.45 ± 5.93 |     | 9.92 ± 6.46  |    | 13.31 ± 14.91 |              |

**Statin (%)**

|                                |     |              |     |              |    |              |               |
|--------------------------------|-----|--------------|-----|--------------|----|--------------|---------------|
| All                            | 349 | 52.15 ± 2.67 | 291 | 52.58 ± 2.93 | 58 | 50.0 ± 6.57  | 2.58 ± 7.19   |
| CCI-all education <sup>a</sup> | 262 | 50.0 ± 3.09  | 218 | 51.83 ± 3.38 | 44 | 40.91 ± 7.41 | 10.93 ± 8.15  |
| CCI-web <sup>a</sup>           | 126 | 47.62 ± 4.45 | 104 | 50.96 ± 4.9  | 22 | 31.82 ± 9.93 | 19.14 ± 11.07 |
| CCI-onsite <sup>a</sup>        | 136 | 52.21 ± 4.28 | 114 | 52.63 ± 4.68 | 22 | 50.0 ± 10.66 | 2.63 ± 11.64  |

|                                        |    |              |    |              |    |                 |                |
|----------------------------------------|----|--------------|----|--------------|----|-----------------|----------------|
| Usual care <sup>a</sup>                | 87 | 58.62 ± 5.28 | 73 | 54.79 ± 5.83 | 14 | 78.57 ± 10.97   | -23.78 ± 12.42 |
| CCI-web vs. CCI-onsite <sup>b</sup>    |    | -4.59 ± 6.18 |    | -1.67 ± 6.77 |    | -18.18 ± 14.57  |                |
| CCI-web vs. usual care <sup>b</sup>    |    | -11.0 ± 6.9  |    | -3.83 ± 7.61 |    | -46.75 ± 14.79† |                |
| CCI-onsite vs. usual care <sup>b</sup> |    | -6.41 ± 6.8  |    | -2.16 ± 7.47 |    | -28.57 ± 15.29  |                |
| CCI-all vs. usual care <sup>b</sup>    |    | -8.62 ± 6.12 |    | -2.96 ± 6.74 |    | -37.66 ± 13.24† |                |

### Blood pressure medication (%)

|                                        |     |               |     |               |    |               |                |
|----------------------------------------|-----|---------------|-----|---------------|----|---------------|----------------|
| All                                    | 349 | 63.61 ± 2.58  | 291 | 63.92 ± 2.82  | 58 | 62.07 ± 6.37  | 1.85 ± 6.97    |
| CCI-all education <sup>a</sup>         | 262 | 67.18 ± 2.90  | 218 | 68.35 ± 3.15  | 44 | 61.36 ± 7.34  | 6.98 ± 7.99    |
| CCI-web <sup>a</sup>                   | 126 | 65.08 ± 4.25  | 104 | 65.38 ± 4.67  | 22 | 63.64 ± 10.26 | 1.75 ± 11.27   |
| CCI-onsite <sup>a</sup>                | 136 | 69.12 ± 3.96  | 114 | 71.05 ± 4.25  | 22 | 59.09 ± 10.48 | 11.96 ± 11.31  |
| Usual care <sup>a</sup>                | 87  | 52.87 ± 5.35  | 73  | 50.68 ± 5.85  | 14 | 64.29 ± 12.81 | -13.60 ± 14.08 |
| CCI-web vs. CCI-onsite <sup>b</sup>    |     | -4.04 ± 5.81  |     | -5.67 ± 6.31  |    | 4.55 ± 14.67  |                |
| CCI-web vs. usual care <sup>b</sup>    |     | 12.21 ± 6.83  |     | 14.70 ± 7.48* |    | -0.65 ± 16.41 |                |
| CCI-onsite vs. usual care <sup>b</sup> |     | 16.24 ± 6.66* |     | 20.37 ± 7.23† |    | -5.19 ± 16.55 |                |
| CCI-all vs. usual care <sup>b</sup>    |     | 14.30 ± 6.09* |     | 17.66 ± 6.65† |    | -2.92 ± 14.76 |                |

### ACE or ARB (%)

|                                        |     |               |     |               |    |               |                |
|----------------------------------------|-----|---------------|-----|---------------|----|---------------|----------------|
| All                                    | 349 | 26.65 ± 2.37  | 291 | 25.09 ± 2.54  | 58 | 34.48 ± 6.24  | -9.4 ± 6.74    |
| CCI-all education <sup>a</sup>         | 262 | 29.39 ± 2.81  | 218 | 27.98 ± 3.04  | 44 | 36.36 ± 7.25  | -8.38 ± 7.86   |
| CCI-web <sup>a</sup>                   | 126 | 32.54 ± 4.17  | 104 | 30.77 ± 4.53  | 22 | 40.91 ± 10.48 | -10.14 ± 11.42 |
| CCI-onsite <sup>a</sup>                | 136 | 26.47 ± 3.78  | 114 | 25.44 ± 4.08  | 22 | 31.82 ± 9.93  | -6.38 ± 10.74  |
| Usual care <sup>a</sup>                | 87  | 18.39 ± 4.15  | 73  | 16.44 ± 4.34  | 14 | 28.57 ± 12.07 | -12.13 ± 12.83 |
| CCI-web vs. CCI-onsite <sup>b</sup>    |     | 6.07 ± 5.63   |     | 5.33 ± 6.09   |    | 9.09 ± 14.44  |                |
| CCI-web vs. usual care <sup>b</sup>    |     | 14.15 ± 5.89* |     | 14.33 ± 6.27* |    | 12.34 ± 15.99 |                |
| CCI-onsite vs. usual care <sup>b</sup> |     | 8.08 ± 5.62   |     | 9.0 ± 5.95    |    | 3.25 ± 15.63  |                |
| CCI-all vs. usual care <sup>b</sup>    |     | 11.0 ± 5.02*  |     | 11.54 ± 5.3*  |    | 7.79 ± 14.08  |                |

### Diuretics (%)

|                                        |     |              |     |               |    |                |                 |
|----------------------------------------|-----|--------------|-----|---------------|----|----------------|-----------------|
| All                                    | 349 | 38.11 ± 2.6  | 291 | 37.11 ± 2.83  | 58 | 43.1 ± 6.5     | -5.99 ± 7.09    |
| CCI-all education <sup>a</sup>         | 262 | 40.84 ± 3.04 | 218 | 41.28 ± 3.33  | 44 | 38.64 ± 7.34   | 2.65 ± 8.06     |
| CCI-web <sup>a</sup>                   | 126 | 40.48 ± 4.37 | 104 | 41.35 ± 4.83  | 22 | 36.36 ± 10.26  | 4.98 ± 11.34    |
| CCI-onsite <sup>a</sup>                | 136 | 41.18 ± 4.22 | 114 | 41.23 ± 4.61  | 22 | 40.91 ± 10.48  | 0.32 ± 11.45    |
| Usual care <sup>a</sup>                | 87  | 29.89 ± 4.91 | 73  | 24.66 ± 5.04  | 14 | 57.14 ± 13.23  | -32.49 ± 14.16* |
| CCI-web vs. CCI-onsite <sup>b</sup>    |     | -0.7 ± 6.08  |     | 0.12 ± 6.68   |    | -4.55 ± 14.67  |                 |
| CCI-web vs. usual care <sup>b</sup>    |     | 10.59 ± 6.57 |     | 16.69 ± 6.98* |    | -20.78 ± 16.74 |                 |
| CCI-onsite vs. usual care <sup>b</sup> |     | 11.29 ± 6.47 |     | 16.57 ± 6.83* |    | -16.23 ± 16.88 |                 |
| CCI-all vs. usual care <sup>b</sup>    |     | 10.95 ± 5.77 |     | 16.63 ± 6.05† |    | -18.51 ± 15.13 |                 |

<sup>a</sup>Mean and standard deviations for continuous variables, percents and standard errors for categorical variables

<sup>b</sup>Difference between means or percentages  $\pm$  1 standard error of the difference. Significant baseline difference between means or percentages at  $0.05 > P \geq 0.01$  (\*);  $0.01 > P \geq 0.001$  (†);  $0.001 > P \geq 0.0001$  (‡); and  $P < 0.0001$  (§).

**Table S2. Mean changes in biomarkers between baseline and one-year for participants receiving the CCI and UC.**

|                                                          | N   | Difference (SD)<br>or $\pm$ SE | Completers             |                                |                                                           |                                | All starters<br>(Dropouts imputed) <sup>d</sup> |                                |                       |
|----------------------------------------------------------|-----|--------------------------------|------------------------|--------------------------------|-----------------------------------------------------------|--------------------------------|-------------------------------------------------|--------------------------------|-----------------------|
|                                                          |     |                                | Unadjusted<br>One Year | Signif-<br>icance <sup>e</sup> | Adjusted for baseline <sup>c</sup><br>Difference $\pm$ SE | Signif-<br>icance <sup>e</sup> | Unadjusted<br>One Year                          | Signif-<br>icance <sup>e</sup> |                       |
| <b>Beta-hydroxybutyrate (mmol·L<sup>-1</sup>)</b>        |     |                                |                        |                                |                                                           |                                |                                                 |                                |                       |
| CCI-all education <sup>a</sup>                           | 186 | 0.14 (0.36)                    | 0.31 (0.35)            | 2.2x10 <sup>-5</sup>           | 0.13 $\pm$ 0.02                                           | 2.8x10 <sup>-7</sup>           | 0.12 $\pm$ 0.02                                 | 0.3 $\pm$ 0.02                 | 5.8x10 <sup>-7</sup>  |
| CCI-web <sup>a</sup>                                     | 88  | 0.14 (0.37)                    | 0.32 (0.36)            | 0.0003                         | 0.14 $\pm$ 0.04                                           | 0.0001                         | 0.13 $\pm$ 0.04                                 | 0.31 $\pm$ 0.04                | 0.0004                |
| CCI-onsite <sup>a</sup>                                  | 98  | 0.13 (0.36)                    | 0.29 (0.34)            | 0.0002                         | 0.12 $\pm$ 0.04                                           | 0.0007                         | 0.12 $\pm$ 0.03                                 | 0.28 $\pm$ 0.03                | 0.0004                |
| Usual care <sup>a</sup>                                  | 59  | 0.04 (0.23)                    | 0.18 (0.21)            | 0.24                           | 0.06 $\pm$ 0.05                                           | 0.18                           | 0.03 $\pm$ 0.04                                 | 0.18 $\pm$ 0.03                | 0.38                  |
| CCI-web vs. CCI-onsite <sup>b</sup>                      |     | 0.01 $\pm$ 0.05                |                        | 0.87                           | 0.02 $\pm$ 0.05                                           | 0.73                           | 0.01 $\pm$ 0.05                                 |                                | 0.86                  |
| CCI-web vs. usual care <sup>b</sup>                      |     | 0.11 $\pm$ 0.05                |                        | 0.03                           | 0.07 $\pm$ 0.06                                           | 0.22                           | 0.1 $\pm$ 0.05                                  |                                | 0.06                  |
| CCI-onsite vs. usual care <sup>b</sup>                   |     | 0.1 $\pm$ 0.05                 |                        | 0.04                           | 0.06 $\pm$ 0.06                                           | 0.37                           | 0.09 $\pm$ 0.05                                 |                                | 0.08                  |
| CCI-all vs. usual care <sup>b</sup>                      |     | 0.1 (0.0)                      |                        | 0.01                           | 0.06 $\pm$ 0.05                                           | 0.24                           | 0.09 $\pm$ 0.04                                 |                                | 0.04                  |
| <b>Hemoglobin A<sub>1c</sub> (mmol·mol<sup>-1</sup>)</b> |     |                                |                        |                                |                                                           |                                |                                                 |                                |                       |
| CCI-all education <sup>a</sup>                           | 204 | -14.1 (14.43)                  | 44.25 (10.28)          | <10 <sup>-16</sup>             | -14.43 $\pm$ 0.98                                         | <10 <sup>-16</sup>             | -14.21 $\pm$ 0.98                               | 45.23 $\pm$ 0.77               | <10 <sup>-16</sup>    |
| CCI-web <sup>a</sup>                                     | 98  | -12.9 (12.24)                  | 44.79 (9.29)           | <10 <sup>-16</sup>             | -13.12 $\pm$ 1.42                                         | <10 <sup>-16</sup>             | -13.23 $\pm$ 1.2                                | 45.45 $\pm$ 1.09               | <10 <sup>-16</sup>    |
| CCI-onsite <sup>a</sup>                                  | 106 | -15.3 (16.07)                  | 43.7 (11.15)           | <10 <sup>-16</sup>             | -15.63 $\pm$ 1.42                                         | <10 <sup>-16</sup>             | -15.19 $\pm$ 1.42                               | 45.12 $\pm$ 1.09               | <10 <sup>-16</sup>    |
| Usual care <sup>a</sup>                                  | 72  | 2.19 (14.76)                   | 63.27 (19.89)          | 0.21                           | 2.4 $\pm$ 1.75                                            | 0.17                           | 2.19 $\pm$ 1.64                                 | 62.18 $\pm$ 2.08               | 0.18                  |
| CCI-web vs. CCI-onsite <sup>b</sup>                      |     | 2.3 $\pm$ 1.97                 |                        | 0.24                           | 2.4 $\pm$ 2.08                                            | 0.23                           | 2.08 $\pm$ 1.86                                 |                                | 0.28                  |
| CCI-web vs. usual care <sup>b</sup>                      |     | -15.08 $\pm$ 2.19              |                        | 1.5x10 <sup>-12</sup>          | -15.63 $\pm$ 2.3                                          | 1.1x10 <sup>-11</sup>          | -15.3 $\pm$ 2.08                                |                                | 3.8x10 <sup>-14</sup> |
| CCI-onsite vs. usual care <sup>b</sup>                   |     | -17.49 $\pm$ 2.3               |                        | 8.7x10 <sup>-14</sup>          | -18.04 $\pm$ 2.3                                          | 6.7x10 <sup>-15</sup>          | -17.38 $\pm$ 2.19                               |                                | 6.7x10 <sup>-16</sup> |
| CCI-all vs. usual care <sup>b</sup>                      |     | -16.29 $\pm$ 1.97              |                        | 4.4x10 <sup>-16</sup>          | -16.83 $\pm$ 2.08                                         | 4.4x10 <sup>-16</sup>          | -16.4 $\pm$ 1.86                                |                                | <10 <sup>-16</sup>    |
| <b>Hemoglobin A<sub>1c</sub> (%)</b>                     |     |                                |                        |                                |                                                           |                                |                                                 |                                |                       |
| CCI-all education <sup>a</sup>                           | 204 | -1.29 (1.32)                   | 6.20 (0.94)            | <10 <sup>-16</sup>             | -1.32 $\pm$ 0.09                                          | <10 <sup>-16</sup>             | -1.30 $\pm$ 0.09                                | 6.29 $\pm$ 0.07                | <10 <sup>-16</sup>    |
| CCI-web <sup>a</sup>                                     | 98  | -1.18 (1.12)                   | 6.25 (0.85)            | <10 <sup>-16</sup>             | -1.20 $\pm$ 0.13                                          | <10 <sup>-16</sup>             | -1.21 $\pm$ 0.11                                | 6.31 $\pm$ 0.1                 | <10 <sup>-16</sup>    |
| CCI-onsite <sup>a</sup>                                  | 106 | -1.40 (1.47)                   | 6.15 (1.02)            | <10 <sup>-16</sup>             | -1.43 $\pm$ 0.13                                          | <10 <sup>-16</sup>             | -1.39 $\pm$ 0.13                                | 6.28 $\pm$ 0.1                 | <10 <sup>-16</sup>    |
| Usual care <sup>a</sup>                                  | 72  | 0.20 (1.35)                    | 7.94 (1.82)            | 0.21                           | 0.22 $\pm$ 0.16                                           | 0.17                           | 0.20 $\pm$ 0.15                                 | 7.84 $\pm$ 0.19                | 0.18                  |
| CCI-web vs. CCI-onsite <sup>b</sup>                      |     | 0.21 $\pm$ 0.18                |                        | 0.24                           | 0.22 $\pm$ 0.19                                           | 0.23                           | 0.19 $\pm$ 0.17                                 |                                | 0.28                  |
| CCI-web vs. usual care <sup>b</sup>                      |     | -1.38 $\pm$ 0.20               |                        | 1.5x10 <sup>-12</sup>          | -1.43 $\pm$ 0.21                                          | 1.1x10 <sup>-11</sup>          | -1.40 $\pm$ 0.19                                |                                | 3.8x10 <sup>-14</sup> |
| CCI-onsite vs. usual care <sup>b</sup>                   |     | -1.60 $\pm$ 0.21               |                        | 8.7x10 <sup>-14</sup>          | -1.65 $\pm$ 0.21                                          | 6.7x10 <sup>-15</sup>          | -1.59 $\pm$ 0.20                                |                                | 6.7x10 <sup>-16</sup> |
| CCI-all vs. usual care <sup>b</sup>                      |     | -1.49 $\pm$ 0.18               |                        | 4.4x10 <sup>-16</sup>          | -1.54 $\pm$ 0.19                                          | 4.4x10 <sup>-16</sup>          | -1.50 $\pm$ 0.17                                |                                | <10 <sup>-16</sup>    |
| <b>Fasting glucose (mmol·L<sup>-1</sup>)</b>             |     |                                |                        |                                |                                                           |                                |                                                 |                                |                       |
| CCI-all education <sup>a</sup>                           | 202 | -1.96 (3.2)                    | 6.84 (1.87)            | <10 <sup>-16</sup>             | -2.02 $\pm$ 0.26                                          | 6.0x10 <sup>-15</sup>          | -1.95 $\pm$ 0.23                                | 6.98 $\pm$ 0.17                | <10 <sup>-16</sup>    |

|                                        |     |              |             |                       |              |                      |              |             |                       |
|----------------------------------------|-----|--------------|-------------|-----------------------|--------------|----------------------|--------------|-------------|-----------------------|
| CCI-web <sup>a</sup>                   | 97  | -1.87 (2.99) | 6.63 (1.42) | 6.4x10 <sup>-10</sup> | -1.94 ± 0.37 | 1.8x10 <sup>-7</sup> | -1.92 ± 0.31 | 6.66 ± 0.21 | 3.7x10 <sup>-10</sup> |
| CCI-onsite <sup>a</sup>                | 105 | -2.04 (3.41) | 7.04 (2.19) | 8.5x10 <sup>-10</sup> | -2.1 ± 0.36  | 7.1x10 <sup>-9</sup> | -1.98 ± 0.34 | 7.27 ± 0.25 | 4.4x10 <sup>-9</sup>  |
| Usual care <sup>a</sup>                | 71  | 0.59 (4.59)  | 9.3 (4.74)  | 0.28                  | 0.81 ± 0.45  | 0.07                 | 0.63 ± 0.49  | 9.29 ± 0.49 | 0.2                   |
| CCI-web vs. CCI-onsite <sup>b</sup>    |     | 0.16 ± 0.45  |             | 0.71                  | 0.16 ± 0.52  | 0.76                 | 0.06 ± 0.46  |             | 0.9                   |
| CCI-web vs. usual care <sup>b</sup>    |     | -2.47 ± 0.62 |             | 7.5x10 <sup>-5</sup>  | -2.75 ± 0.59 | 2.6x10 <sup>-6</sup> | -2.55 ± 0.58 |             | 1.1x10 <sup>-5</sup>  |
| CCI-onsite vs. usual care <sup>b</sup> |     | -2.63 ± 0.64 |             | 3.7x10 <sup>-5</sup>  | -2.91 ± 0.59 | 8.2x10 <sup>-7</sup> | -2.6 ± 0.6   |             | 1.3x10 <sup>-5</sup>  |
| CCI-all vs. usual care <sup>b</sup>    |     | -2.55 ± 0.59 |             | 1.5x10 <sup>-5</sup>  | -2.83 ± 0.53 | 7.9x10 <sup>-8</sup> | -2.58 ± 0.54 |             | 2.1x10 <sup>-6</sup>  |

### Insulin, all (pmol·L<sup>-1</sup>)

|                                        |     |                 |                 |                       |                 |                       |                 |                |                      |
|----------------------------------------|-----|-----------------|-----------------|-----------------------|-----------------|-----------------------|-----------------|----------------|----------------------|
| CCI-all education <sup>a</sup>         | 186 | -75.01 (178.49) | 122.58 (169.6)  | 9.9x10 <sup>-9</sup>  | -91.4 ± 12.15   | 5.5x10 <sup>-14</sup> | -73.62 ± 12.5   | 126.26 ± 12.5  | 4.3x10 <sup>-9</sup> |
| CCI-web <sup>a</sup>                   | 88  | -52.16 (202.59) | 123.83 (212.38) | 0.02                  | -74.66 ± 18.2   | 4.1x10 <sup>-5</sup>  | -49.87 ± 19.38  | 118.9 ± 19.52  | 0.01                 |
| CCI-onsite <sup>a</sup>                | 98  | -95.56 (151.89) | 121.47 (120.08) | 4.7x10 <sup>-10</sup> | -105.15 ± 16.53 | 2.2x10 <sup>-10</sup> | -95.56 ± 15.9   | 133.14 ± 15.77 | 2.0x10 <sup>-9</sup> |
| Usual care <sup>a</sup>                | 59  | 12.15 (210.23)  | 218.91 (239.46) | 0.66                  | 36.88 ± 29.66   | 0.21                  | 5.97 ± 24.52    | 206.27 ± 26.11 | 0.81                 |
| CCI-web vs. CCI-onsite <sup>b</sup>    |     | 43.41 ± 26.46   |                 | 0.1                   | 30.49 ± 24.79   | 0.22                  | 45.7 ± 25.07    |                | 0.07                 |
| CCI-web vs. usual care <sup>b</sup>    |     | -64.31 ± 34.86  |                 | 0.07                  | -111.54 ± 34.86 | 0.001                 | -55.84 ± 31.25  |                | 0.07                 |
| CCI-onsite vs. usual care <sup>b</sup> |     | -107.72 ± 31.39 |                 | 0.0006                | -142.03 ± 34.38 | 8.1x10 <sup>-5</sup>  | -101.54 ± 29.24 |                | 0.0005               |
| CCI-all vs. usual care <sup>b</sup>    |     | -87.23 (29.86)  |                 | 0.004                 | -127.58 ± 32.43 | 0.0009                | -79.59 ± 27.5   |                | 0.004                |

### Insulin, excluding exogenous users (pmol·L<sup>-1</sup>)

|                                        |     |                  |                 |                       |                 |                       |                 |                |                       |
|----------------------------------------|-----|------------------|-----------------|-----------------------|-----------------|-----------------------|-----------------|----------------|-----------------------|
| CCI-all education <sup>a</sup>         | 135 | -90.49 (118.34)  | 112.93 (99.94)  | <10 <sup>-16</sup>    | -91.4 ± 12.15   | 6.0x10 <sup>-14</sup> | -88.41 ± 10.9   | 112.16 ± 8.68  | 6.7x10 <sup>-16</sup> |
| CCI-web <sup>a</sup>                   | 60  | -76.19 (77.09)   | 102.44 (65.14)  | 1.9x10 <sup>-14</sup> | -74.66 ± 18.2   | 4.1x10 <sup>-5</sup>  | -67.99 ± 14.17  | 101.26 ± 11.39 | 1.6x10 <sup>-6</sup>  |
| CCI-onsite <sup>a</sup>                | 75  | -101.95 (142.51) | 121.33 (120.57) | 5.7x10 <sup>-10</sup> | -105.15 ± 16.53 | 2.0x10 <sup>-10</sup> | -107.3 ± 15.56  | 122.16 ± 12.99 | 5.9x10 <sup>-12</sup> |
| Usual care <sup>a</sup>                | 25  | 41.25 (236.27)   | 240.85 (301.97) | 0.38                  | 36.25 ± 29.72   | 0.22                  | 33.68 ± 27.85   | 234.53 ± 28.75 | 0.23                  |
| CCI-web vs. CCI-onsite <sup>b</sup>    |     | 25.77 ± 19.24    |                 | 0.18                  | 30.49 ± 24.79   | 0.22                  | 39.31 ± 21.11   |                | 0.06                  |
| CCI-web vs. usual care <sup>b</sup>    |     | -117.51 ± 48.27  |                 | 0.01                  | -111.54 ± 34.93 | 0.002                 | -101.67 ± 31.25 |                | 0.001                 |
| CCI-onsite vs. usual care <sup>b</sup> |     | -143.28 ± 50.0   |                 | 0.004                 | -142.03 ± 34.45 | 3.6x10 <sup>-5</sup>  | -140.98 ± 31.95 |                | 1.0x10 <sup>-5</sup>  |
| CCI-all vs. usual care <sup>b</sup>    |     | -131.82 ± 48.34  |                 | 0.006                 | -127.58 ± 32.43 | 8.4x10 <sup>-5</sup>  | -122.09 ± 29.93 |                | 4.6x10 <sup>-5</sup>  |

### C-peptide (nmol·L<sup>-1</sup>)

|                                        |     |              |             |                       |              |                       |              |             |                       |
|----------------------------------------|-----|--------------|-------------|-----------------------|--------------|-----------------------|--------------|-------------|-----------------------|
| CCI-all education <sup>a</sup>         | 185 | -0.36 (0.57) | 1.11 (0.59) | <10 <sup>-16</sup>    | -0.34 ± 0.05 | 1.1x10 <sup>-13</sup> | -0.33 ± 0.04 | 1.11 ± 0.04 | 2.2x10 <sup>-16</sup> |
| CCI-web <sup>a</sup>                   | 88  | -0.4 (0.51)  | 1.0 (0.52)  | 3.8x10 <sup>-13</sup> | -0.39 ± 0.07 | 4.8x10 <sup>-9</sup>  | -0.37 ± 0.06 | 1.02 ± 0.05 | 1.9x10 <sup>-11</sup> |
| CCI-onsite <sup>a</sup>                | 97  | -0.32 (0.62) | 1.21 (0.63) | 3.6x10 <sup>-7</sup>  | -0.3 ± 0.07  | 3.8x10 <sup>-6</sup>  | -0.3 ± 0.06  | 1.19 ± 0.06 | 6.5x10 <sup>-7</sup>  |
| Usual care <sup>a</sup>                | 59  | 0.08 (0.77)  | 1.43 (0.92) | 0.41                  | 0.02 ± 0.09  | 0.79                  | 0.06 ± 0.09  | 1.44 ± 0.1  | 0.5                   |
| CCI-web vs. CCI-onsite <sup>b</sup>    |     | -0.07 ± 0.08 |             | 0.37                  | -0.09 ± 0.09 | 0.36                  | -0.07 ± 0.08 |             | 0.36                  |
| CCI-web vs. usual care <sup>b</sup>    |     | -0.48 ± 0.12 |             | 2.8x10 <sup>-5</sup>  | -0.41 ± 0.11 | 0.0003                | -0.43 ± 0.11 |             | 3.5x10 <sup>-5</sup>  |
| CCI-onsite vs. usual care <sup>b</sup> |     | -0.4 ± 0.12  |             | 0.0007                | -0.32 ± 0.11 | 0.005                 | -0.36 ± 0.11 |             | 0.0008                |
| CCI-all vs. usual care <sup>b</sup>    |     | -0.44 ± 0.11 |             | 5.4x10 <sup>-5</sup>  | -0.37 ± 0.1  | 0.0004                | -0.4 ± 0.1   |             | 5.3x10 <sup>-5</sup>  |

**HOMA-IR (insulin derived), all**

|                                        |     |               |              |                      |              |                       |              |             |                       |
|----------------------------------------|-----|---------------|--------------|----------------------|--------------|-----------------------|--------------|-------------|-----------------------|
| CCI-all education <sup>a</sup>         | 179 | -5.54 (12.19) | 5.65 (8.71)  | 1.2x10 <sup>-9</sup> | -5.87 ± 0.92 | 2.2x10 <sup>-10</sup> | -5.58 ± 0.86 | 6.16 ± 0.69 | 7.5x10 <sup>-11</sup> |
| CCI-web <sup>a</sup>                   | 84  | -4.27 (11.9)  | 5.64 (10.27) | 0.001                | -4.32 ± 1.33 | 0.001                 | -4.35 ± 1.16 | 5.29 ± 0.99 | 0.0002                |
| CCI-onsite <sup>a</sup>                | 95  | -6.67 (12.39) | 5.66 (7.11)  | 1.5x10 <sup>-7</sup> | -7.31 ± 1.28 | 1.3x10 <sup>-8</sup>  | -6.72 ± 1.24 | 6.96 ± 0.95 | 6.3x10 <sup>-8</sup>  |
| Usual care <sup>a</sup>                | 56  | 1.65 (12.46)  | 12.96 (12.9) | 0.32                 | 2.4 ± 1.76   | 0.17                  | 1.82 ± 1.49  | 12.2 ± 1.42 | 0.22                  |
| CCI-web vs. CCI-onsite <sup>b</sup>    |     | 2.4 ± 1.82    |              | 0.19                 | 2.99 ± 1.85  | 0.11                  | 2.37 ± 1.7   |             | 0.16                  |
| CCI-web vs. usual care <sup>b</sup>    |     | -5.92 ± 2.11  |              | 0.005                | -6.86 ± 2.21 | 0.002                 | -6.17 ± 1.89 |             | 0.001                 |
| CCI-onsite vs. usual care <sup>b</sup> |     | -8.32 ± 2.09  |              | 7.1x10 <sup>-5</sup> | -9.85 ± 2.25 | 1.2x10 <sup>-5</sup>  | -8.54 ± 1.94 |             | 1.1x10 <sup>-5</sup>  |
| CCI-all vs. usual care <sup>b</sup>    |     | -7.19 (1.9)   |              | 0.0002               | -8.27±2.04   | 4.9x10 <sup>-5</sup>  | -7.4 ± 1.72  |             | 1.6x10 <sup>-5</sup>  |

**HOMA-IR (insulin derived), excluding exogenous insulin users**

|                                        |     |               |               |                       |               |                       |               |             |                      |
|----------------------------------------|-----|---------------|---------------|-----------------------|---------------|-----------------------|---------------|-------------|----------------------|
| CCI-all education <sup>a</sup>         | 129 | -6.03 (10.67) | 4.98 (5.69)   | 1.4x10 <sup>-10</sup> | -6.13 ± 0.98  | 4.2x10 <sup>-10</sup> | -6.82 ± 0.9   | 5.61 ± 0.51 | 3.2x10 <sup>-5</sup> |
| CCI-web <sup>a</sup>                   | 57  | -4.77 (6.0)   | 4.43 (3.19)   | 2.0x10 <sup>-9</sup>  | -4.83 ± 1.48  | 0.001                 | -5.19 ± 1.1   | 4.56 ± 0.62 | 2.3x10 <sup>-6</sup> |
| CCI-onsite <sup>a</sup>                | 72  | -7.02 (13.22) | 5.4 (7.07)    | 6.6x10 <sup>-6</sup>  | -7.17 ± 1.32  | 6.2x10 <sup>-8</sup>  | -8.32 ± 1.37  | 6.59 ± 0.78 | 1.2x10 <sup>-9</sup> |
| Usual care <sup>a</sup>                | 25  | 3.99 (12.76)  | 13.35 (14.71) | 0.12                  | 4.1 ± 2.34    | 0.08                  | 1.84 ± 1.96   | 13.3 ± 1.56 | 0.35                 |
| CCI-web vs. CCI-onsite <sup>b</sup>    |     | 2.25 ± 1.75   |               | 0.2                   | 2.33 ± 2.0    | 0.25                  | 3.13 ± 1.76   |             | 0.07                 |
| CCI-web vs. usual care <sup>b</sup>    |     | -8.76 ± 2.67  |               | 0.001                 | -8.98 ± 2.77  | 0.002                 | -7.03 ± 2.25  |             | 0.002                |
| CCI-onsite vs. usual care <sup>b</sup> |     | -11.01 ± 2.99 |               | 0.0002                | -11.31 ± 2.72 | 3.2x10 <sup>-5</sup>  | -10.16 ± 2.39 |             | 2.1x10 <sup>-5</sup> |
| CCI-all vs. usual care <sup>b</sup>    |     | -10.01 ± 2.72 |               | 0.0002                | -10.23 ± 2.56 | 6.3x10 <sup>-5</sup>  | -8.65 ± 2.16  |             | 6.0x10 <sup>-5</sup> |

**HOMA-IR (C-peptide derived)**

|                                        |     |              |               |                       |              |                       |              |             |                       |
|----------------------------------------|-----|--------------|---------------|-----------------------|--------------|-----------------------|--------------|-------------|-----------------------|
| CCI-all education <sup>a</sup>         | 170 | -3.53 (5.59) | 7.9 (3.89)    | 2.2x10 <sup>-16</sup> | -3.53 ± 0.55 | 1.2x10 <sup>-10</sup> | -3.45 ± 0.46 | 8.25 ± 0.4  | 1.0x10 <sup>-13</sup> |
| CCI-web <sup>a</sup>                   | 79  | -3.45 (5.36) | 7.29 (3.62)   | 1.0x10 <sup>-8</sup>  | -3.52 ± 0.79 | 9.2x10 <sup>-6</sup>  | -3.55 ± 0.61 | 7.38 ± 0.5  | 7.6x10 <sup>-9</sup>  |
| CCI-onsite <sup>a</sup>                | 91  | -3.61 (5.81) | 8.43 (4.05)   | 3.1x10 <sup>-9</sup>  | -3.53 ± 0.77 | 3.9x10 <sup>-6</sup>  | -3.36 ± 0.69 | 9.06 ± 0.6  | 1.2x10 <sup>-6</sup>  |
| Usual care <sup>a</sup>                | 47  | 1.94 (10.54) | 12.49 (10.46) | 0.21                  | 1.77 ± 1.12  | 0.11                  | 1.65 ± 1.13  | 12.6 ± 1.11 | 0.14                  |
| CCI-web vs. CCI-onsite <sup>b</sup>    |     | 0.15 ± 0.86  |               | 0.86                  | 0.01 ± 1.11  | 0.99                  | -0.19 ± 0.93 |             | 0.84                  |
| CCI-web vs. usual care <sup>b</sup>    |     | -5.39 ± 1.65 |               | 0.001                 | -5.29 ± 1.38 | 0.0002                | -5.2 ± 1.29  |             | 5.3x10 <sup>-5</sup>  |
| CCI-onsite vs. usual care <sup>b</sup> |     | -5.55 ± 1.65 |               | 0.0008                | -5.3 ± 1.42  | 0.0002                | -5.02 ± 1.33 |             | 0.0002                |
| CCI-all vs. usual care <sup>b</sup>    |     | -5.47 (1.6)  |               | 0.0006                | -5.29 ± 1.28 | 3.3 x10 <sup>-5</sup> | -5.11 ± 1.22 |             | 3.0x10 <sup>-5</sup>  |

**Weight-clinic (kg)**

|                                        |     |                |                |                    |               |                    |               |               |                    |
|----------------------------------------|-----|----------------|----------------|--------------------|---------------|--------------------|---------------|---------------|--------------------|
| CCI-all education <sup>a</sup>         | 184 | -14.24 (10.29) | 101.17 (22.06) | <10 <sup>-16</sup> | -13.81 ± 0.63 | <10 <sup>-16</sup> | -13.8 ± 0.71  | 102.72 ± 1.5  | <10 <sup>-16</sup> |
| CCI-web <sup>a</sup>                   | 84  | -13.77 (9.84)  | 101.0 (23.29)  | <10 <sup>-16</sup> | -13.93 ± 0.92 | <10 <sup>-16</sup> | -13.7 ± 1.01  | 100.98 ± 2.25 | <10 <sup>-16</sup> |
| CCI-onsite <sup>a</sup>                | 100 | -14.64 (10.69) | 101.31 (21.09) | <10 <sup>-16</sup> | -13.71 ± 0.86 | <10 <sup>-16</sup> | -13.89 ± 0.99 | 104.33 ± 1.99 | <10 <sup>-16</sup> |
| Usual care <sup>a</sup>                | 69  | 0.04 (5.94)    | 106.82 (22.52) | 0.95               | -1.11 ± 1.06  | 0.29               | -0.16 ± 0.84  | 107.31 ± 2.55 | 0.85               |
| CCI-web vs. CCI-onsite <sup>b</sup>    |     | 0.87 ± 1.51    |                | 0.57               | -0.22 ± 1.26  | 0.86               | 0.19 ± 1.41   |               | 0.89               |
| CCI-web vs. usual care <sup>b</sup>    |     | -13.81 ± 1.29  |                | <10 <sup>-16</sup> | -12.81 ± 1.42 | <10 <sup>-16</sup> | -13.55 ± 1.32 |               | <10 <sup>-16</sup> |
| CCI-onsite vs. usual care <sup>b</sup> |     | -14.68 ± 1.29  |                | <10 <sup>-16</sup> | -12.59 ± 1.4  | <10 <sup>-16</sup> | -13.74 ± 1.3  |               | <10 <sup>-16</sup> |
| CCI-all vs. usual care <sup>b</sup>    |     | -14.29 ± 1.04  |                | <10 <sup>-16</sup> | -12.7 ± 1.26  | <10 <sup>-16</sup> | -13.65 ± 1.1  |               | <10 <sup>-16</sup> |

**Systolic blood pressure (mmHg)**

|                                        |     |               |                |                      |              |                      |              |               |                      |
|----------------------------------------|-----|---------------|----------------|----------------------|--------------|----------------------|--------------|---------------|----------------------|
| CCI-all education <sup>a</sup>         | 187 | -6.77 (16.3)  | 125.84 (13.22) | 1.3x10 <sup>-8</sup> | -6.52 ± 1.24 | 1.6x10 <sup>-7</sup> | -6.36 ± 1.12 | 125.57 ± 0.91 | 1.3x10 <sup>-8</sup> |
| CCI-web <sup>a</sup>                   | 87  | -7.38 (16.39) | 125.66 (10.72) | 2.7x10 <sup>-5</sup> | -7.31 ± 1.81 | 5.2x10 <sup>-5</sup> | -6.91 ± 1.63 | 125.72 ± 1.39 | 2.3x10 <sup>-5</sup> |
| CCI-onsite <sup>a</sup>                | 100 | -6.24 (16.28) | 128.97 (15.6)  | 0.0001               | -5.8 ± 1.72  | 0.0007               | -5.85 ± 1.53 | 125.43 ± 1.18 | 0.0001               |
| Usual care <sup>a</sup>                | 67  | 0.25 (17.8)   | 128.57 (11.82) | 0.91                 | -0.45 ± 2.15 | 0.83                 | -0.9 ± 2.07  | 129.01 ± 1.72 | 0.67                 |
| CCI-web vs. CCI-onsite <sup>b</sup>    |     | -1.14 ± 2.4   |                | 0.63                 | -1.51 ± 2.49 | 0.55                 | -1.06 ± 2.24 |               | 0.64                 |
| CCI-web vs. usual care <sup>b</sup>    |     | -7.63 ± 2.8   |                | 0.006                | -6.83 ± 2.84 | 0.02                 | -6.01 ± 2.64 |               | 0.02                 |
| CCI-onsite vs. usual care <sup>b</sup> |     | -6.49 ± 2.72  |                | 0.02                 | -5.32 ± 2.84 | 0.06                 | -4.95 ± 2.58 |               | 0.05                 |
| CCI-all vs. usual care <sup>b</sup>    |     | -7.02 (2.4)   |                | 0.005                | -6.07 ± 2.55 | 0.02                 | -5.46 ± 2.36 |               | 0.02                 |

**Diastolic blood pressure (mmHg)**

|                                        |     |               |              |                      |              |                      |              |              |                      |
|----------------------------------------|-----|---------------|--------------|----------------------|--------------|----------------------|--------------|--------------|----------------------|
| CCI-all education <sup>a</sup>         | 187 | -3.59 (9.33)  | 78.0 (7.55)  | 1.4x10 <sup>-7</sup> | -3.5 ± 0.7   | 6.2x10 <sup>-7</sup> | -3.51 ± 0.65 | 78.58 ± 0.56 | 7.2x10 <sup>-8</sup> |
| CCI-web <sup>a</sup>                   | 87  | -3.36 (9.94)  | 78.16 (7.66) | 0.002                | -3.3 ± 1.02  | 0.001                | -3.77 ± 1.0  | 78.83 ± 0.83 | 0.0002               |
| CCI-onsite <sup>a</sup>                | 100 | -3.8 (8.81)   | 77.86 (7.5)  | 1.6x10 <sup>-5</sup> | -3.67 ± 0.97 | 0.0001               | -3.28 ± 0.85 | 78.35 ± 0.75 | 0.0001               |
| Usual care <sup>a</sup>                | 67  | -0.12 (10.15) | 80.99 (9.59) | 0.92                 | -0.39 ± 1.21 | 0.75                 | -0.9 ± 1.2   | 81.12 ± 1.08 | 0.45                 |
| CCI-web vs. CCI-onsite <sup>b</sup>    |     | 0.44 ± 1.38   |              | 0.75                 | 0.37 ± 1.4   | 0.79                 | -0.49 ± 1.31 |              | 0.71                 |
| CCI-web vs. usual care <sup>b</sup>    |     | -3.24 ± 1.63  |              | 0.05                 | -2.92 ± 1.6  | 0.07                 | -2.87 ± 1.56 |              | 0.07                 |
| CCI-onsite vs. usual care <sup>b</sup> |     | -3.68 ± 1.52  |              | 0.02                 | -3.29 ± 1.6  | 0.04                 | -2.38 ± 1.47 |              | 0.11                 |
| CCI-all vs. usual care <sup>b</sup>    |     | -3.47 ± 1.42  |              | 0.01                 | -3.10 ± 1.44 | 0.03                 | -2.61 ± 1.37 |              | 0.06                 |

**Total cholesterol (mmol·L<sup>-1</sup>)**

|                                        |     |             |             |        |             |       |              |             |       |
|----------------------------------------|-----|-------------|-------------|--------|-------------|-------|--------------|-------------|-------|
| CCI-all education <sup>a</sup>         | 186 | 0.24 (0.93) | 4.92 (1.18) | 0.0004 | 0.24 ± 0.08 | 0.004 | 0.21 ± 0.07  | 4.97 ± 0.08 | 0.006 |
| CCI-web <sup>a</sup>                   | 88  | 0.25(0.93)  | 4.83 (1.19) | 0.01   | 0.26 ± 0.12 | 0.04  | 0.16 ± 0.11  | 4.95 ± 0.12 | 0.15  |
| CCI-onsite <sup>a</sup>                | 98  | 0.24 (0.94) | 5.0 (1.17)  | 0.01   | 0.23 ± 0.12 | 0.05  | 0.25 ± 0.1   | 4.99 ± 0.12 | 0.02  |
| Usual care <sup>a</sup>                | 59  | 0.00 (1.60) | 4.72 (1.62) | 0.99   | 0.0 ± 0.16  | 0.98  | -0.04 ± 0.18 | 4.69 ± 0.18 | 0.83  |
| CCI-web vs. CCI-onsite <sup>b</sup>    |     | 0.01 ± 0.14 |             | 0.97   | 0.02 ± 0.17 | 0.89  | -0.09 ± 0.15 |             | 0.54  |
| CCI-web vs. usual care <sup>b</sup>    |     | 0.25 ± 0.23 |             | 0.28   | 0.26 ± 0.20 | 0.19  | 0.2 ± 0.21   |             | 0.34  |
| CCI-onsite vs. usual care <sup>b</sup> |     | 0.24 ± 0.23 |             | 0.29   | 0.24 ± 0.20 | 0.25  | 0.29 ± 0.2   |             | 0.16  |
| CCI-all vs. usual care <sup>b</sup>    |     | 0.25 ± 0.22 |             | 0.26   | 0.25 ± 0.18 | 0.17  | 0.24 ± 0.19  |             | 0.2   |

**LDL-C (mmol·L<sup>-1</sup>)**

|                                        |     |              |             |                      |              |                      |              |             |                      |
|----------------------------------------|-----|--------------|-------------|----------------------|--------------|----------------------|--------------|-------------|----------------------|
| CCI-all education <sup>a</sup>         | 172 | 0.28 (0.83)  | 2.87 (0.98) | 7.7x10 <sup>-6</sup> | 0.28 ± 0.07  | 2.6x10 <sup>-5</sup> | 0.26 ± 0.06  | 2.94 ± 0.07 | 5.1x10 <sup>-5</sup> |
| CCI-web <sup>a</sup>                   | 83  | 0.30 (0.86)  | 2.82 (1.01) | 0.002                | 0.31 ± 0.10  | 0.001                | 0.22 ± 0.09  | 2.91 ± 0.1  | 0.02                 |
| CCI-onsite <sup>a</sup>                | 89  | 0.27(0.80)   | 2.93 (0.95) | 0.002                | 0.25 ± 0.09  | 0.007                | 0.29 ± 0.09  | 2.97 ± 0.1  | 0.0009               |
| Usual care <sup>a</sup>                | 48  | -0.28 (0.97) | 2.32 (0.8)  | 0.05                 | -0.28 ± 0.13 | 0.03                 | -0.28 ± 0.12 | 2.32 ± 0.12 | 0.02                 |
| CCI-web vs. CCI-onsite <sup>b</sup>    |     | 0.03 ± 0.13  |             | 0.81                 | 0.06 ± 0.14  | 0.67                 | -0.07 ± 0.13 |             | 0.59                 |
| CCI-web vs. usual care <sup>b</sup>    |     | 0.58 ± 0.17  |             | 0.0006               | 0.59 ± 0.16  | 0.0004               | 0.51 ± 0.15  |             | 0.001                |
| CCI-onsite vs. usual care <sup>b</sup> |     | 0.55 ± 0.16  |             | 0.0009               | 0.53 ± 0.17  | 0.002                | 0.58 ± 0.15  |             | 0.0001               |

|                                            |     |              |             |                       |              |                       |              |             |                       |
|--------------------------------------------|-----|--------------|-------------|-----------------------|--------------|-----------------------|--------------|-------------|-----------------------|
| CCI-all vs. usual care <sup>b</sup>        |     | 0.56 ± 0.15  |             | 0.0003                | 0.56 ± 0.15  | 0.0002                | 0.54 ± 0.14  |             | 0.0001                |
| <b>Apo B (g·L<sup>-1</sup>)</b>            |     |              |             |                       |              |                       |              |             |                       |
| CCI-all education <sup>a</sup>             | 186 | -0.01 (0.24) | 1.03 (0.29) | 0.69                  | -0.0 ± 0.02  | 0.82                  | -0.02 ± 0.02 | 1.04 ± 0.02 | 0.37                  |
| CCI-web <sup>a</sup>                       | 88  | -0.0 (0.2)   | 1.03 (0.29) | 0.95                  | -0.0 ± 0.03  | 0.93                  | -0.03 ± 0.03 | 1.05 ± 0.03 | 0.28                  |
| CCI-onsite <sup>a</sup>                    | 98  | -0.01 (0.27) | 1.03 (0.3)  | 0.66                  | -0.01 ± 0.03 | 0.82                  | -0.01 ± 0.03 | 1.02 ± 0.03 | 0.82                  |
| Usual care <sup>a</sup>                    | 59  | 0.02 (0.37)  | 1.07 (0.39) | 0.75                  | 0.0 ± 0.04   | 0.9                   | 0.0 ± 0.04   | 1.06 ± 0.04 | 0.95                  |
| CCI-web vs. CCI-onsite <sup>b</sup>        |     | 0.01 ± 0.03  |             | 0.76                  | 0.0 ± 0.04   | 0.92                  | -0.02 ± 0.04 |             | 0.56                  |
| CCI-web vs. usual care <sup>b</sup>        |     | -0.02 ± 0.05 |             | 0.75                  | -0.01 ± 0.05 | 0.87                  | -0.03 ± 0.05 |             | 0.53                  |
| CCI-onsite vs. usual care <sup>b</sup>     |     | -0.03 ± 0.06 |             | 0.62                  | -0.01 ± 0.05 | 0.81                  | -0.01 ± 0.05 |             | 0.86                  |
| CCI-all vs. usual care <sup>b</sup>        |     | -0.02 (0.05) |             | 0.66                  | -0.01 ± 0.05 | 0.83                  | -0.02 ± 0.05 |             | 0.67                  |
| <b>HDL-C (mmol·L<sup>-1</sup>)</b>         |     |              |             |                       |              |                       |              |             |                       |
| CCI-all education <sup>a</sup>             | 186 | 0.20 (0.31)  | 1.29 (0.41) | <10 <sup>-16</sup>    | 0.19 ± 0.02  | <10 <sup>-16</sup>    | 0.2 ± 0.02   | 1.29 ± 0.03 | <10 <sup>-16</sup>    |
| CCI-web <sup>a</sup>                       | 88  | 0.16 (0.33)  | 1.26 (0.42) | 2.9x10 <sup>-6</sup>  | 0.17 ± 0.03  | 7.3x10 <sup>-8</sup>  | 0.18 ± 0.03  | 1.28 ± 0.04 | 2.9x10 <sup>-8</sup>  |
| CCI-onsite <sup>a</sup>                    | 98  | 0.23 (0.29)  | 1.32 (0.41) | 7.1x10 <sup>-11</sup> | 0.21 ± 0.03  | 5.3x10 <sup>-12</sup> | 0.22 ± 0.03  | 1.31 ± 0.04 | 2.3x10 <sup>-14</sup> |
| Usual care <sup>a</sup>                    | 59  | -0.04 (0.23) | 0.92 (0.32) | 0.15                  | -0.02 ± 0.04 | 0.69                  | -0.03 ± 0.03 | 0.95 ± 0.04 | 0.41                  |
| CCI-web vs. CCI-onsite <sup>b</sup>        |     | -0.06 ± 0.05 |             | 0.18                  | -0.04 ± 0.04 | 0.36                  | -0.04 ± 0.04 |             | 0.31                  |
| CCI-web vs. usual care <sup>b</sup>        |     | 0.21 ± 0.05  |             | 7.1x10 <sup>-6</sup>  | 0.18 ± 0.05  | 0.0003                | 0.2 ± 0.05   |             | 1.0x10 <sup>-5</sup>  |
| CCI-onsite vs. usual care <sup>b</sup>     |     | 0.27 ± 0.04  |             | 1.1x10 <sup>-10</sup> | 0.22 ± 0.05  | 1.3x10 <sup>-5</sup>  | 0.25 ± 0.04  |             | 2.3x10 <sup>-8</sup>  |
| CCI-all vs. usual care <sup>b</sup>        |     | 0.24 ± 0.04  |             | 1.7x10 <sup>-10</sup> | 0.2 ± 0.05   | 9.9x10 <sup>-6</sup>  | 0.23 ± 0.04  |             | 1.3x10 <sup>-8</sup>  |
| <b>Triglycerides (mmol·L<sup>-1</sup>)</b> |     |              |             |                       |              |                       |              |             |                       |
| CCI-all education <sup>a</sup>             | 186 | -0.56 (1.9)  | 1.71 (1.64) | <10 <sup>-16</sup>    | -0.56 ± 0.18 | 9.3x10 <sup>-15</sup> | -0.54 ± 0.14 | 1.67 ± 0.13 | <10 <sup>-16</sup>    |
| CCI-web <sup>a</sup>                       | 88  | -0.36 (1.79) | 1.8 (1.77)  | 2.2x10 <sup>-6</sup>  | -0.34 ± 0.25 | 2.0x10 <sup>-7</sup>  | -0.4 ± 0.2   | 1.73 ± 0.19 | 1.3x10 <sup>-7</sup>  |
| CCI-onsite <sup>a</sup>                    | 98  | -0.74(1.97)  | 1.62 (1.51) | 3.4x10 <sup>-14</sup> | -0.78 ± 0.25 | 6.0x10 <sup>-13</sup> | -0.67 ± 0.21 | 1.62 ± 0.18 | 1.9x10 <sup>-12</sup> |
| Usual care <sup>a</sup>                    | 59  | 0.34 (3.40)  | 3.7 (5.67)  | 0.22                  | -0.35 ± 0.32 | 0.48                  | 0.32 ± 0.37  | 3.45 ± 0.55 | 0.43                  |
| CCI-web vs. CCI-onsite <sup>b</sup>        |     | 0.38 ± 0.28  |             | 0.16                  | 0.44 ± 0.35  | 0.20                  | 0.28 ± 0.29  |             | 0.34                  |
| CCI-web vs. usual care <sup>b</sup>        |     | -0.7 ± 0.48  |             | 6.9x10 <sup>-5</sup>  | -0.71 ± 0.41 | 0.0004                | -0.71 ± 0.42 |             | 8.7x10 <sup>-5</sup>  |
| CCI-onsite vs. usual care <sup>b</sup>     |     | -1.08 ± 0.48 |             | 4.8x10 <sup>-8</sup>  | 1.15 ± 0.42  | 4.2x10 <sup>-6</sup>  | -0.99 ± 0.42 |             | 1.2x10 <sup>-6</sup>  |
| CCI-all vs. usual care <sup>b</sup>        |     | -0.9 ± 0.46  |             | 1.4x10 <sup>-7</sup>  | -0.92 ± 0.38 | 7.5x10 <sup>-6</sup>  | -0.86 ± 0.39 |             | 9.9x10 <sup>-7</sup>  |
| <b>Total/HDL-cholesterol</b>               |     |              |             |                       |              |                       |              |             |                       |
| CCI-all education <sup>a</sup>             | 186 | -0.47 (1.41) | 4.18 (1.71) | 4.1 x10 <sup>-6</sup> | -0.45 ± 0.16 | 0.005                 | -0.53 ± 0.12 | 4.19 ± 0.13 | 1.7x10 <sup>-5</sup>  |
| CCI-web <sup>a</sup>                       | 88  | -0.37 (1.41) | 4.19 (1.57) | 0.02                  | -0.35 ± 0.22 | 0.11                  | -0.47 ± 0.18 | 4.2 ± 0.18  | 0.007                 |
| CCI-onsite <sup>a</sup>                    | 98  | -0.57 (1.4)  | 4.17 (1.84) | 5.1 x10 <sup>-5</sup> | -0.54 ± 0.22 | 0.01                  | -0.58 ± 0.17 | 4.17 ± 0.2  | 0.0008                |
| Usual care <sup>a</sup>                    | 59  | 0.52 (3.45)  | 5.96 (4.27) | 0.24                  | 0.44 ± 0.29  | 0.13                  | 0.42 ± 0.36  | 5.73 ± 0.43 | 0.24                  |
| CCI-web vs. CCI-onsite <sup>b</sup>        |     | 0.21 ± 0.21  |             | 0.31                  | 0.19 ± 0.31  | 0.61                  | 0.1 ± 0.25   |             | 0.67                  |
| CCI-web vs. usual care <sup>b</sup>        |     | -0.89 ± 0.47 |             | 0.06                  | -0.80 ± 0.36 | 0.03                  | -0.89 ± 0.4  |             | 0.03                  |



|                                                   |     |                 |                |                       |                |                        |                |               |                       |
|---------------------------------------------------|-----|-----------------|----------------|-----------------------|----------------|------------------------|----------------|---------------|-----------------------|
| CCI-onsite vs. usual care <sup>b</sup>            |     | -1.09 ± 0.47    |                | 0.02                  | -1.00 ± 0.37   | 0.008                  | -1.0 ± 0.4     |               | 0.01                  |
| CCI-all vs. usual care <sup>b</sup>               |     | -1.00 ± 0.46    |                | 0.03                  | -0.89 ± 0.33   | 0.008                  | -0.95 ± 0.38   |               | 0.01                  |
| <b>hsC-reactive protein (nmol·L<sup>-1</sup>)</b> |     |                 |                |                       |                |                        |                |               |                       |
| CCI-all education <sup>a</sup>                    | 193 | -31.71 (127.15) | 53.81 (67.24)  | <10 <sup>-8</sup>     | -29.43 ± 9.14  | <10 <sup>-16</sup>     | -34.29 ± 10.0  | 52.86 ± 5.24  | <10 <sup>-16</sup>    |
| CCI-web <sup>a</sup>                              | 98  | -42.38 (167.34) | 56.0 (68.67)   | 5.9x10 <sup>-11</sup> | -40.1 ± 12.76  | 1.5x10 <sup>-10</sup>  | -34.86 ± 14.29 | 54.57 ± 7.62  | 6.1x10 <sup>-11</sup> |
| CCI-onsite <sup>a</sup>                           | 95  | -20.76 (62.1)   | 51.72 (66.0)   | 3.1x10 <sup>-11</sup> | -18.19 ± 13.14 | 4.7x10 <sup>-12</sup>  | -33.81 ± 13.91 | 51.24 ± 7.24  | 7.8x10 <sup>-13</sup> |
| Usual care <sup>a</sup>                           | 70  | 12.48 (126.86)  | 99.43 (139.91) | 0.94                  | 8.48 ± 16.1    | 0.88                   | 12.48 ± 14.1   | 97.72 ± 14.76 | 0.93                  |
| CCI-web vs. CCI-onsite <sup>b</sup>               |     | -21.62 ± 18.1   |                | 0.44                  | -21.91 ± 18.29 | 0.62                   | -1.05 ± 20.0   |               | 0.43                  |
| CCI-web vs. usual care <sup>b</sup>               |     | -54.86 ± 22.67  |                | 4.7x10 <sup>-5</sup>  | -48.1 ± 20.67  | 3.5x10 <sup>-5</sup>   | -47.33 ± 20.1  |               | 4.9x10 <sup>-5</sup>  |
| CCI-onsite vs. usual care <sup>b</sup>            |     | -33.24 ± 16.48  |                | 6.7x10 <sup>-6</sup>  | -26.29 ± 21.24 | 8.2x10 <sup>-6</sup>   | -46.29 ± 19.81 |               | 3.4x10 <sup>-6</sup>  |
| CCI-all vs. usual care <sup>b</sup>               |     | -44.29 (17.14)  |                | 1.2x10 <sup>-6</sup>  | -37.91 ± 18.55 | 3.0x10 <sup>-5</sup>   | -46.76 ± 17.24 |               | 9.3x10 <sup>-7</sup>  |
| <b>ALT (μkat·L<sup>-1</sup>)</b>                  |     |                 |                |                       |                |                        |                |               |                       |
| CCI-all education <sup>a</sup>                    | 201 | -0.16 (0.4)     | 0.36 (0.19)    | 9.5x10 <sup>-9</sup>  | -0.16 ± 0.03   | 9.4x10 <sup>-10</sup>  | -0.15 ± 0.02   | 0.36 ± 0.01   | 2.4x10 <sup>-10</sup> |
| CCI-web <sup>a</sup>                              | 97  | -0.18 (0.31)    | 0.37 (0.15)    | 4.9x10 <sup>-9</sup>  | -0.19 ± 0.04   | 1.3x10 <sup>-6</sup>   | -0.17 ± 0.03   | 0.37 ± 0.02   | 4.1x10 <sup>-9</sup>  |
| CCI-onsite <sup>a</sup>                           | 104 | -0.14 (0.47)    | 0.35 (0.22)    | 0.002                 | -0.14 ± 0.04   | 0.0001                 | -0.14 ± 0.04   | 0.36 ± 0.02   | 0.0004                |
| Usual care <sup>a</sup>                           | 71  | 0.01 (0.28)     | 0.47 (0.34)    | 0.67                  | 0.02 ± 0.05    | 0.67                   | 0.01 ± 0.03    | 0.47 ± 0.04   | 0.77                  |
| CCI-web vs. CCI-onsite <sup>b</sup>               |     | -0.04 ± 0.06    |                | 0.48                  | -0.04 ± 0.39   | 0.43                   | -0.04 ± 0.05   |               | 0.46                  |
| CCI-web vs. usual care <sup>b</sup>               |     | -0.2 ± 0.05     |                | 1.5x10 <sup>-5</sup>  | -0.2 ± 0.06    | 0.0009                 | -0.18 ± 0.04   |               | 2.7x10 <sup>-5</sup>  |
| CCI-onsite vs. usual care <sup>b</sup>            |     | -0.16 ± 0.06    |                | 0.006                 | -0.16 ± 0.06   | 0.009                  | -0.15 ± 0.05   |               | 0.003                 |
| CCI-all vs. usual care <sup>b</sup>               |     | -0.18 (0.04)    |                | 5.1x10 <sup>-5</sup>  | -0.18 ± 0.05   | 0.0009                 | -0.16 ± 0.04   |               | 4.6x10 <sup>-5</sup>  |
| <b>AST (μkat·L<sup>-1</sup>)</b>                  |     |                 |                |                       |                |                        |                |               |                       |
| CCI-all education <sup>a</sup>                    | 201 | -0.09 (0.27)    | 0.32 (0.11)    | 2.8x10 <sup>-6</sup>  | -0.09 ± 0.02   | 1.3x10 <sup>-5</sup>   | -0.08 ± 0.02   | 0.32 ± 0.01   | 5.1x10 <sup>-7</sup>  |
| CCI-web <sup>a</sup>                              | 97  | -0.12 (0.29)    | 0.32 (0.1)     | 5.1x10 <sup>-5</sup>  | -0.12 ± 0.03   | 2.4x10 <sup>-5</sup>   | -0.11 ± 0.03   | 0.32 ± 0.01   | 2.0x10 <sup>-5</sup>  |
| CCI-onsite <sup>a</sup>                           | 104 | -0.06 (0.24)    | 0.31 (0.12)    | 0.01                  | -0.06 ± 0.03   | 0.05                   | -0.06 ± 0.02   | 0.31 ± 0.01   | 0.005                 |
| Usual care <sup>a</sup>                           | 71  | 0.01 (0.32)     | 0.4 (0.27)     | 0.79                  | 0.01 ± 0.04    | 0.69                   | 0.01 ± 0.03    | 0.41 ± 0.03   | 0.72                  |
| CCI-web vs. CCI-onsite <sup>b</sup>               |     | -0.06 ± 0.04    |                | 0.12                  | -0.07 ± 0.04   | 0.11                   | -0.05 ± 0.03   |               | 0.12                  |
| CCI-web vs. usual care <sup>b</sup>               |     | -0.13 ± 0.05    |                | 0.007                 | -0.13 ± 0.05   | 0.004                  | -0.12 ± 0.04   |               | 0.004                 |
| CCI-onsite vs. usual care <sup>b</sup>            |     | -0.07 ± 0.04    |                | 0.12                  | -0.07 ± 0.05   | 0.14                   | -0.07 ± 0.04   |               | 0.08                  |
| CCI-all vs. usual care <sup>b</sup>               |     | -0.1 (0.04)     |                | 0.02                  | -0.1 ± 0.04    | 0.02                   | -0.09 ± 0.04   |               | 0.01                  |
| <b>Alkaline phosphatase (μkat·L<sup>-1</sup>)</b> |     |                 |                |                       |                |                        |                |               |                       |
| CCI-all education <sup>a</sup>                    | 200 | -0.16 (0.24)    | 1.07 (0.35)    | <10 <sup>-8</sup>     | -0.17 ± 0.02   | <10 <sup>-16</sup>     | -0.16 ± 0.02   | 1.08 ± 0.02   | <10 <sup>-16</sup>    |
| CCI-web <sup>a</sup>                              | 97  | -0.14 (0.21)    | 1.09 (0.37)    | 4.8x10 <sup>-11</sup> | -0.15 ± 0.02   | 9.3 x10 <sup>-10</sup> | -0.14 ± 0.02   | 1.08 ± 0.03   | 3.3x10 <sup>-11</sup> |
| CCI-onsite <sup>a</sup>                           | 103 | -0.19 (0.26)    | 1.06 (0.34)    | 4.2x10 <sup>-13</sup> | -0.19 ± 0.02   | 1.8x10 <sup>-15</sup>  | -0.18 ± 0.02   | 1.08 ± 0.03   | 2.5x10 <sup>-13</sup> |
| Usual care <sup>a</sup>                           | 71  | 0.0 (0.22)      | 1.31 (0.45)    | 0.94                  | 0.02 ± 0.03    | 0.61                   | 0.01 ± 0.03    | 1.3 ± 0.05    | 0.67                  |
| CCI-web vs. CCI-onsite <sup>b</sup>               |     | 0.05 ± 0.03     |                | 0.17                  | 0.04 ± 0.03    | 0.22                   | 0.03 ± 0.03    |               | 0.32                  |

|                                                |     |               |               |                      |              |                      |              |              |                      |
|------------------------------------------------|-----|---------------|---------------|----------------------|--------------|----------------------|--------------|--------------|----------------------|
| CCI-web vs. usual care <sup>b</sup>            |     | -0.14 ± 0.03  |               | 2.0x10 <sup>-5</sup> | -0.16 ± 0.04 | 2.1x10 <sup>-5</sup> | -0.15 ± 0.03 |              | 5.4x10 <sup>-6</sup> |
| CCI-onsite vs. usual care <sup>b</sup>         |     | -0.19 ± 0.04  |               | 2.2x10 <sup>-7</sup> | -0.2 ± 0.04  | 1.5x10 <sup>-7</sup> | -0.19 ± 0.04 |              | 1.6x10 <sup>-7</sup> |
| CCI-all vs. usual care <sup>b</sup>            |     | -0.17 (0.03)  |               | 6.3x10 <sup>-8</sup> | -0.18 ± 0.03 | 1.4x10 <sup>-7</sup> | -0.17 ± 0.03 |              | 3.1x10 <sup>-8</sup> |
| <b>Serum creatinine (μmol·L<sup>-1</sup>)</b>  |     |               |               |                      |              |                      |              |              |                      |
| CCI-all education <sup>a</sup>                 | 202 | -3.54 (14.14) | 73.37 (18.56) | 0.0001               | -3.54 ± 0.88 | 0.001                | -3.54 ± 0.88 | 74.26 ± 0.88 | 0.0001               |
| CCI-web <sup>a</sup>                           | 97  | -4.42 (10.61) | 73.37 (17.68) | 0.0003               | -3.54 ± 1.77 | 0.01                 | -3.54 ± 0.88 | 73.37 ± 1.77 | 0.001                |
| CCI-onsite <sup>a</sup>                        | 105 | -3.54 (15.91) | 74.26 (20.33) | 0.03                 | -3.54 ± 1.77 | 0.04                 | -3.54 ± 1.77 | 76.02 ± 1.77 | 0.01                 |
| Usual care <sup>a</sup>                        | 71  | -0.88 (18.56) | 77.79 (18.56) | 0.56                 | -2.65 ± 1.77 | 0.15                 | -1.77 ± 1.77 | 78.68 ± 1.77 | 0.29                 |
| CCI-web vs. CCI-onsite <sup>b</sup>            |     | -0.88 ± 1.77  |               | 0.76                 | -0.88 ± 2.65 | 0.76                 | 0.0 ± 1.77   |              | 0.96                 |
| CCI-web vs. usual care <sup>b</sup>            |     | -2.65 ± 2.65  |               | 0.27                 | -0.88 ± 2.65 | 0.66                 | -1.77 ± 2.65 |              | 0.49                 |
| CCI-onsite vs. usual care <sup>b</sup>         |     | -1.77 ± 2.65  |               | 0.43                 | 0.0 ± 2.65   | 0.86                 | -1.77 ± 2.65 |              | 0.55                 |
| CCI-all vs. usual care <sup>b</sup>            |     | -2.65 ± 2.65  |               | 0.32                 | -0.88 ± 2.65 | 0.73                 | -1.77 ± 2.65 |              | 0.49                 |
| <b>BUN (mmol·L<sup>-1</sup>)</b>               |     |               |               |                      |              |                      |              |              |                      |
| CCI-all education <sup>a</sup>                 | 202 | 0.76 (2.49)   | 6.82 (2.78)   | 1.5x10 <sup>-5</sup> | 0.75 ± 0.17  | 1.6x10 <sup>-5</sup> | 0.79 ± 0.17  | 6.81 ± 0.19  | 5.5x10 <sup>-6</sup> |
| CCI-web <sup>a</sup>                           | 97  | 0.45 (1.73)   | 6.62 (2.18)   | 0.01                 | 0.46 ± 0.25  | 0.07                 | 0.5 ± 0.2    | 6.51 ± 0.23  | 0.01                 |
| CCI-onsite <sup>a</sup>                        | 105 | 1.04 (3.01)   | 7.0 (3.25)    | 0.0004               | 1.04 ± 0.24  | 2.0x10 <sup>-5</sup> | 1.06 ± 0.28  | 7.08 ± 0.3   | 0.0001               |
| Usual care <sup>a</sup>                        | 71  | 0.07 (2.15)   | 5.66 (2.11)   | 0.78                 | 0.06 ± 0.3   | 0.85                 | -0.01 ± 0.27 | 5.72 ± 0.26  | 0.97                 |
| CCI-web vs. CCI-onsite <sup>b</sup>            |     | -0.6 ± 0.34   |               | 0.08                 | -0.58 ± 0.35 | 0.1                  | -0.56 ± 0.34 |              | 0.1                  |
| CCI-web vs. usual care <sup>b</sup>            |     | 0.38 ± 0.31   |               | 0.22                 | 0.41 ± 0.39  | 0.29                 | 0.51 ± 0.34  |              | 0.13                 |
| CCI-onsite vs. usual care <sup>b</sup>         |     | 0.97 ± 0.39   |               | 0.01                 | 0.99 ± 0.4   | 0.01                 | 1.07 ± 0.39  |              | 0.005                |
| CCI-all vs. usual care <sup>b</sup>            |     | 0.69 (0.29)   |               | 0.03                 | 0.69 (0.32)  | 0.05                 | 0.8 ± 0.32   |              | 0.01                 |
| <b>eGFR (mL·s<sup>-1</sup>·m<sup>-2</sup>)</b> |     |               |               |                      |              |                      |              |              |                      |
| CCI-all education <sup>a</sup>                 | 202 | 0.03 (0.15)   | 1.38 (0.2)    | 0.003                | 0.03 ± 0.01  | 0.009                | 0.03 ± 0.01  | 1.38 ± 0.01  | 0.005                |
| CCI-web <sup>a</sup>                           | 97  | 0.03 (0.14)   | 1.4 (0.17)    | 0.01                 | 0.03 ± 0.02  | 0.04                 | 0.03 ± 0.01  | 1.4 ± 0.02   | 0.03                 |
| CCI-onsite <sup>a</sup>                        | 105 | 0.03 (0.17)   | 1.36 (0.23)   | 0.08                 | 0.03 ± 0.02  | 0.1                  | 0.03 ± 0.02  | 1.35 ± 0.02  | 0.07                 |
| Usual care <sup>a</sup>                        | 71  | 0.01 (0.19)   | 1.34 (0.22)   | 0.51                 | 0.02 ± 0.02  | 0.36                 | 0.01 ± 0.02  | 1.34 ± 0.02  | 0.48                 |
| CCI-web vs. CCI-onsite <sup>b</sup>            |     | 0.01 ± 0.02   |               | 0.79                 | 0.01 ± 0.02  | 0.77                 | 0.0 ± 0.02   |              | 0.89                 |
| CCI-web vs. usual care <sup>b</sup>            |     | 0.02 ± 0.03   |               | 0.42                 | 0.02 ± 0.03  | 0.56                 | 0.02 ± 0.03  |              | 0.51                 |
| CCI-onsite vs. usual care <sup>b</sup>         |     | 0.01 ± 0.03   |               | 0.58                 | 0.01 ± 0.03  | 0.75                 | 0.01 ± 0.03  |              | 0.6                  |
| CCI-all vs. usual care <sup>b</sup>            |     | 0.03 ± 0.02   |               | 0.28                 | 0.01 ± 0.02  | 0.61                 | 0.02 ± 0.02  |              | 0.51                 |
| <b>Anion gap (mmol·L<sup>-1</sup>)</b>         |     |               |               |                      |              |                      |              |              |                      |
| CCI-all education <sup>a</sup>                 | 201 | 0.29 (2.02)   | 7.08 (1.75)   | 0.04                 | 0.28 ± 0.15  | 0.06                 | 0.28 ± 0.14  | 7.13 ± 0.12  | 0.04                 |
| CCI-web <sup>a</sup>                           | 97  | 0.07 (1.97)   | 7.04 (1.77)   | 0.72                 | 0.11 ± 0.22  | 0.61                 | 0.12 ± 0.2   | 7.05 ± 0.18  | 0.55                 |
| CCI-onsite <sup>a</sup>                        | 104 | 0.49 (2.06)   | 7.12 (1.74)   | 0.02                 | 0.45 ± 0.21  | 0.1                  | 0.43 ± 0.19  | 7.19 ± 0.17  | 0.02                 |
| Usual care <sup>a</sup>                        | 71  | 0.83 (2.44)   | 7.75 (1.97)   | 0.004                | 0.84 ± 0.26  | 0.001                | 0.81 ± 0.26  | 7.75 ± 0.22  | 0.002                |

|                                             |     |                |                |        |               |        |               |                |                      |
|---------------------------------------------|-----|----------------|----------------|--------|---------------|--------|---------------|----------------|----------------------|
| CCI-web vs. CCI-onsite <sup>b</sup>         |     | -0.42 ± 0.28   |                | 0.14   | -0.35 ± 0.3   | 0.26   | -0.31 ± 0.28  |                | 0.26                 |
| CCI-web vs. usual care <sup>b</sup>         |     | -0.76 ± 0.35   |                | 0.03   | -0.72 ± 0.34  | 0.04   | -0.69 ± 0.33  |                | 0.04                 |
| CCI-onsite vs. usual care <sup>b</sup>      |     | -0.34 ± 0.35   |                | 0.33   | -0.38 ± 0.35  | 0.28   | -0.38 ± 0.33  |                | 0.25                 |
| CCI-all vs. usual care <sup>b</sup>         |     | -0.54 (0.3)    |                | 0.09   | -0.56 ± 0.31  | 0.07   | -0.53 ± 0.3   |                | 0.08                 |
| <b>CO<sub>2</sub> (mmol·L<sup>-1</sup>)</b> |     |                |                |        |               |        |               |                |                      |
| CCI-all education <sup>a</sup>              | 202 | 0.12 (2.26)    | 28.06 (2.29)   | 0.45   | 0.16 ± 0.18   | 0.38   | 0.18 ± 0.16   | 27.94 ± 0.16   | 0.27                 |
| CCI-web <sup>a</sup>                        | 97  | 0.44 (2.02)    | 28.41 (2.12)   | 0.03   | 0.41 ± 0.25   | 0.11   | 0.45 ± 0.22   | 28.34 ± 0.22   | 0.04                 |
| CCI-onsite <sup>a</sup>                     | 105 | -0.18 (2.43)   | 27.74 (2.41)   | 0.45   | -0.08 ± 0.25  | 0.73   | -0.07 ± 0.24  | 27.57 ± 0.23   | 0.77                 |
| Usual care <sup>a</sup>                     | 71  | 0.17 (2.97)    | 28.23 (2.58)   | 0.63   | -0.2 ± 0.3    | 0.51   | 0.04 ± 0.33   | 28.12 ± 0.29   | 0.9                  |
| CCI-web vs. CCI-onsite <sup>b</sup>         |     | 0.62 ± 0.31    |                | 0.05   | 0.49 ± 0.35   | 0.16   | 0.52 ± 0.32   |                | 0.11                 |
| CCI-web vs. usual care <sup>b</sup>         |     | 0.27 ± 0.41    |                | 0.5    | 0.6 ± 0.4     | 0.13   | 0.41 ± 0.4    |                | 0.3                  |
| CCI-onsite vs. usual care <sup>b</sup>      |     | -0.35 ± 0.42   |                | 0.41   | 0.11 ± 0.4    | 0.79   | -0.11 ± 0.41  |                | 0.78                 |
| CCI-all vs. usual care <sup>b</sup>         |     | -0.05 (0.3)    |                | 0.9    | 0.36 ± 0.36   | 0.32   | 0.14 ± 0.37   |                | 0.71                 |
| <b>Uric acid (μmol·L<sup>-1</sup>)</b>      |     |                |                |        |               |        |               |                |                      |
| CCI-all education <sup>a</sup>              | 202 | 0.59 (70.79)   | 349.18 (91.01) | 0.91   | 1.78 ± 4.76   | 0.72   | 1.78 ± 4.76   | 349.77 ± 5.95  | 0.67                 |
| CCI-web <sup>a</sup>                        | 98  | -0.59 (77.93)  | 360.48 (83.87) | 0.93   | 0.59 ± 7.14   | 0.95   | 1.78 ± 7.14   | 356.91 ± 8.33  | 0.8                  |
| CCI-onsite <sup>a</sup>                     | 104 | 1.78 (63.65)   | 338.47 (95.77) | 0.77   | 2.97 ± 7.14   | 0.65   | 2.38 ± 6.54   | 343.23 ± 8.92  | 0.72                 |
| Usual care <sup>a</sup>                     | 71  | -10.71 (64.24) | 320.03 (85.06) | 0.15   | -16.66 ± 8.92 | 0.06   | -11.9 ± 7.73  | 322.41 ± 10.11 | 0.13                 |
| CCI-web vs. CCI-onsite <sup>b</sup>         |     | -2.38 ± 10.11  |                | 0.8    | -2.97 ± 10.11 | 0.79   | -0.59 ± 9.52  |                | 0.96                 |
| CCI-web vs. usual care <sup>b</sup>         |     | 10.11 ± 10.71  |                | 0.35   | 17.25 ± 11.3  | 0.13   | 13.68 ± 10.71 |                | 0.21                 |
| CCI-onsite vs. usual care <sup>b</sup>      |     | 12.49 ± 10.11  |                | 0.2    | 20.22 ± 11.3  | 0.08   | 14.28 ± 10.11 |                | 0.16                 |
| CCI-all vs. usual care <sup>b</sup>         |     | 11.3 ± 8.92    |                | 0.21   | 18.44 ± 10.11 | 0.07   | 13.68 ± 8.92  |                | 0.13                 |
| <b>TSH (mIU·L<sup>-1</sup>)</b>             |     |                |                |        |               |        |               |                |                      |
| CCI-all education <sup>a</sup>              | 200 | -0.41 (1.62)   | 1.9 (1.1)      | 0.0004 | -0.4 ± 0.11   | 0.0002 | -0.42 ± 0.1   | 1.91 ± 0.08    | 5.3x10 <sup>-5</sup> |
| CCI-web <sup>a</sup>                        | 98  | -0.44 (1.83)   | 2.02 (1.19)    | 0.02   | -0.45 ± 0.15  | 0.003  | -0.39 ± 0.16  | 1.99 ± 0.11    | 0.01                 |
| CCI-onsite <sup>a</sup>                     | 102 | -0.38 (1.4)    | 1.78 (0.99)    | 0.006  | -0.35 ± 0.15  | 0.02   | -0.45 ± 0.14  | 1.83 ± 0.1     | 0.001                |
| Usual care <sup>a</sup>                     | 70  | -0.09 (0.99)   | 2.01 (0.99)    | 0.47   | -0.09 ± 0.19  | 0.64   | 0.0 ± 0.12    | 1.96 ± 0.12    | 0.98                 |
| CCI-web vs. CCI-onsite <sup>b</sup>         |     | -0.06 ± 0.23   |                | 0.8    | -0.1 ± 0.21   | 0.64   | 0.06 ± 0.21   |                | 0.77                 |
| CCI-web vs. usual care <sup>b</sup>         |     | -0.35 ± 0.22   |                | 0.11   | -0.36 ± 0.24  | 0.14   | -0.38 ± 0.2   |                | 0.05                 |
| CCI-onsite vs. usual care <sup>b</sup>      |     | -0.3 ± 0.18    |                | 0.1    | -0.26 ± 0.25  | 0.29   | -0.45 ± 0.18  |                | 0.02                 |
| CCI-all vs. usual care <sup>b</sup>         |     | -0.33 ± 0.16   |                | 0.05   | -0.31 ± 0.22  | 0.15   | -0.42 ± 0.16  |                | 0.01                 |
| <b>Free T4 (pmol·L<sup>-1</sup>)</b>        |     |                |                |        |               |        |               |                |                      |
| CCI-all education <sup>a</sup>              | 202 | 0.13 (2.32)    | 11.97 (2.45)   | 0.7    | 0.0 ± 0.26    | 0.83   | 0.13 ± 0.13   | 11.97 ± 0.13   | 0.58                 |
| CCI-web <sup>a</sup>                        | 98  | 0.26 (2.32)    | 11.97 (2.06)   | 0.33   | 0.26 ± 0.26   | 0.44   | 0.13 ± 0.26   | 11.97 ± 0.26   | 0.51                 |
| CCI-onsite <sup>a</sup>                     | 104 | -0.13 (2.45)   | 11.84 (2.7)    | 0.72   | -0.13 ± 0.26  | 0.64   | 0.0 ± 0.26    | 11.84 ± 0.26   | 0.88                 |

|                                        |    |              |              |      |              |      |              |              |      |
|----------------------------------------|----|--------------|--------------|------|--------------|------|--------------|--------------|------|
| Usual care <sup>a</sup>                | 71 | 0.26 (4.25)  | 11.58 (2.83) | 0.7  | 0.26 ± 0.39  | 0.48 | 0.26 ± 0.39  | 11.46 ± 0.26 | 0.61 |
| CCI-web vs. CCI-onsite <sup>b</sup>    |    | 0.26 ± 0.39  |              | 0.35 | 0.39 ± 0.39  | 0.38 | 0.13 ± 0.39  |              | 0.72 |
| CCI-web vs. usual care <sup>b</sup>    |    | 0.0 ± 0.51   |              | 0.97 | -0.13 ± 0.51 | 0.89 | -0.13 ± 0.51 |              | 0.89 |
| CCI-onsite vs. usual care <sup>b</sup> |    | -0.26 ± 0.51 |              | 0.61 | -0.39 ± 0.51 | 0.37 | -0.13 ± 0.51 |              | 0.71 |
| CCI-all vs. usual care <sup>b</sup>    |    | -0.13 (0.0)  |              | 0.8  | -0.26 ± 0.39 | 0.43 | -0.13 ± 0.51 |              | 0.78 |

#### Any diabetes medication, excluding metformin (%)

|                                        |     |                |              |                       |               |                       |               |              |                       |
|----------------------------------------|-----|----------------|--------------|-----------------------|---------------|-----------------------|---------------|--------------|-----------------------|
| CCI-all education <sup>a</sup>         | 218 | -27.52 (49.65) | 27.98 ± 3.05 | 2.2x10 <sup>-16</sup> | -27.66 ± 3.21 | <10 <sup>-16</sup>    | -27.19 ± 3.14 | 29.68 ± 2.94 | <10 <sup>-16</sup>    |
| CCI-web <sup>a</sup>                   | 104 | -31.73 (50.75) | 25.0 ± 4.27  | 1.8x10 <sup>-10</sup> | -31.64 ± 4.62 | 7.5x10 <sup>-12</sup> | -30.56 ± 4.6  | 26.58 ± 4.13 | 4.1x10 <sup>-11</sup> |
| CCI-onsite <sup>a</sup>                | 114 | -23.68 (48.52) | 30.7 ± 4.34  | 1.9x10 <sup>-7</sup>  | -23.95 ± 4.47 | 8.4x10 <sup>-8</sup>  | -24.08 ± 4.31 | 32.54 ± 4.19 | 2.4x10 <sup>-8</sup>  |
| Usual care <sup>a</sup>                | 78  | 6.85 (34.68)   | 75.34 ± 5.08 | 0.09                  | 7.54 ± 5.87   | 0.2                   | 5.99 ± 4.31   | 72.66 ± 5.0  | 0.09                  |
| CCI-web vs. CCI-onsite <sup>b</sup>    |     | -8.05 ± 6.74   |              | 0.23                  | -7.69 ± 6.42  | 0.23                  | -6.48 ± 6.3   |              | 0.3                   |
| CCI-web vs. usual care <sup>b</sup>    |     | -38.58 ± 6.42  |              | 1.9x10 <sup>-9</sup>  | -39.18 ± 7.53 | 2.0x10 <sup>-7</sup>  | -36.55 ± 6.31 |              | 1.9x10 <sup>-9</sup>  |
| CCI-onsite vs. usual care <sup>b</sup> |     | -30.53 ± 6.09  |              | 5.4x10 <sup>-7</sup>  | -31.49 ± 7.55 | 3.0x10 <sup>-5</sup>  | -30.07 ± 6.1  |              | 2.4x10 <sup>-7</sup>  |
| CCI-all vs. usual care <sup>b</sup>    |     | -34.37 ± 5.27  |              | 7.0x10 <sup>-11</sup> | -35.36 ± 6.83 | 2.3x10 <sup>-7</sup>  | -33.19 ± 5.34 |              | 9.0x10 <sup>-9</sup>  |

#### Sulfonylurea (%)

|                                        |     |                |              |                      |               |                       |               |              |                       |
|----------------------------------------|-----|----------------|--------------|----------------------|---------------|-----------------------|---------------|--------------|-----------------------|
| CCI-all education <sup>a</sup>         | 218 | -24.31 (43.0)  | 0.0 ± 0.0    | <10 <sup>-16</sup>   | -24.23 ± 2.86 | <10 <sup>-16</sup>    | -23.67 ± 2.7  | 0.0 ± 0.0    | <10 <sup>-16</sup>    |
| CCI-web <sup>a</sup>                   | 104 | -25.96 (44.05) | 0.0 ± 0.0    | 1.9x10 <sup>-9</sup> | -26.04 ± 4.12 | 2.6x10 <sup>-10</sup> | -24.09 ± 3.92 | 0.0 ± 0.0    | 8.3x10 <sup>-10</sup> |
| CCI-onsite <sup>a</sup>                | 114 | -22.81 (42.14) | 0.0 ± 0.0    | 7.6x10 <sup>-9</sup> | -22.53 ± 3.98 | 1.5x10 <sup>-8</sup>  | -23.29 ± 3.72 | 0.0 ± 0.0    | 3.9x10 <sup>-10</sup> |
| Usual care <sup>a</sup>                | 78  | 2.74 (37.17)   | 26.02 ± 5.17 | 0.53                 | 2.56 ± 5.24   | 0.63                  | 1.91 ± 4.23   | 26.02 ± 5.17 | 0.65                  |
| CCI-web vs. CCI-onsite <sup>b</sup>    |     | -3.15 ± 5.85   |              | 0.59                 | -3.52 ± 5.72  | 0.54                  | -0.8 ± 5.41   |              | 0.88                  |
| CCI-web vs. usual care <sup>b</sup>    |     | -28.7 ± 6.13   |              | 2.9x10 <sup>-6</sup> | -28.6 ± 6.71  | 2.0x10 <sup>-5</sup>  | -26.0 ± 5.77  |              | 6.7x10 <sup>-5</sup>  |
| CCI-onsite vs. usual care <sup>b</sup> |     | -25.55 ± 5.87  |              | 1.4x10 <sup>-5</sup> | -25.08 ± 6.73 | 0.0002                | -25.2 ± 5.64  |              | 7.8x10 <sup>-6</sup>  |
| CCI-all vs. usual care <sup>b</sup>    |     | -27.05 ± 5.23  |              | 2.4x10 <sup>-7</sup> | -26.85 ± 6.07 | 9.7x10 <sup>-6</sup>  | -25.58 ± 5.02 |              | 3.3x10 <sup>-7</sup>  |

#### Insulin (%)

|                                        |     |                |              |                      |               |                       |               |              |                      |
|----------------------------------------|-----|----------------|--------------|----------------------|---------------|-----------------------|---------------|--------------|----------------------|
| CCI-all education <sup>a</sup>         | 218 | -13.3 (35.37)  | 15.14 ± 2.43 | 2.8x10 <sup>-8</sup> | -15.5 ± 2.0   | 9.3x10 <sup>-15</sup> | -13.03 ± 2.22 | 16.74 ± 2.4  | 4.3x10 <sup>-9</sup> |
| CCI-web <sup>a</sup>                   | 104 | -11.54 (35.0)  | 16.35 ± 3.64 | 0.0008               | -13.71 ± 2.87 | 1.8x10 <sup>-6</sup>  | -11.47 ± 3.19 | 17.01 ± 3.52 | 0.0003               |
| CCI-onsite <sup>a</sup>                | 114 | -14.91 (35.78) | 14.04 ± 3.27 | 8.6x10 <sup>-6</sup> | -17.18 ± 2.78 | 6.4x10 <sup>-10</sup> | -14.47 ± 3.11 | 16.5 ± 3.31  | 3.3x10 <sup>-6</sup> |
| Usual care <sup>a</sup>                | 78  | 1.37 (31.15)   | 52.05 ± 5.89 | 0.71                 | 8.46 ± 3.65   | 0.02                  | 3.17 ± 3.68   | 49.18 ± 5.45 | 0.39                 |
| CCI-web vs. CCI-onsite <sup>b</sup>    |     | 3.37 ± 4.8     |              | 0.48                 | 3.47 ± 3.99   | 0.38                  | 3.01 ± 4.46   |              | 0.5                  |
| CCI-web vs. usual care <sup>b</sup>    |     | -12.91 ± 5.01  |              | 0.01                 | -22.17 ± 4.69 | 2.3x10 <sup>-6</sup>  | -14.63 ± 4.87 |              | 0.003                |
| CCI-onsite vs. usual care <sup>b</sup> |     | -16.28 ± 4.95  |              | 0.001                | -25.64 ± 4.7  | 4.9x10 <sup>-8</sup>  | -17.64 ± 4.82 |              | 0.0003               |
| CCI-all vs. usual care <sup>b</sup>    |     | -14.67 ± 4.36  |              | 0.0008               | -23.89 ± 4.24 | 1.8 x10 <sup>-8</sup> | -16.19 ± 4.3  |              | 0.0002               |

#### Thiazolidinedione (%)

|                                |     |               |             |      |             |      |              |              |      |
|--------------------------------|-----|---------------|-------------|------|-------------|------|--------------|--------------|------|
| CCI-all education <sup>a</sup> | 218 | -1.38 (15.12) | 0.46 ± 0.46 | 0.18 | -1.47 ± 0.9 | 0.1  | -1.1 ± 0.91  | 0.42 ± 0.49  | 0.23 |
| CCI-web <sup>a</sup>           | 104 | -2.88 (16.82) | 0.0 ± 0.0   | 0.08 | -2.6 ± 1.29 | 0.04 | -2.39 ± 1.43 | -0.07 ± 0.45 | 0.1  |

|                                        |     |              |             |      |              |      |              |             |      |
|----------------------------------------|-----|--------------|-------------|------|--------------|------|--------------|-------------|------|
| CCI-onsite <sup>a</sup>                | 114 | 0.0 (13.3)   | 0.88 ± 0.88 | 1    | -0.42 ± 1.25 | 0.74 | 0.1 ± 1.13   | 0.87 ± 0.84 | 0.93 |
| Usual care <sup>a</sup>                | 78  | 0.0 (0.0)    | 1.37 ± 1.37 |      | 0.26 ± 1.64  | 0.87 | 0.22 ± 0.51  | 1.27 ± 1.26 | 0.67 |
| CCI-web vs. CCI-onsite <sup>b</sup>    |     | -2.88 ± 2.07 |             | 0.16 | -2.18 ± 1.79 | 0.22 | -2.49 ± 1.82 |             | 0.17 |
| CCI-web vs. usual care <sup>b</sup>    |     | -2.88 ± 1.65 |             | 0.08 | -2.87 ± 2.11 | 0.17 | -2.6 ± 1.52  |             | 0.09 |
| CCI-onsite vs. usual care <sup>b</sup> |     | 0.0 ± 1.25   |             | 1    | -0.68 ± 2.11 | 0.75 | -0.12 ± 1.24 |             | 0.93 |
| CCI-all vs. usual care <sup>b</sup>    |     | -1.38 ± 1.02 |             | 0.18 | -1.78 ± 1.91 | 0.35 | -1.31 ± 1.04 |             | 0.21 |

### SGLT-2 (%)

|                                        |     |               |              |                      |               |                      |               |              |                      |
|----------------------------------------|-----|---------------|--------------|----------------------|---------------|----------------------|---------------|--------------|----------------------|
| CCI-all education <sup>a</sup>         | 218 | -9.63 (29.57) | 0.92 ± 0.65  | 1.5x10 <sup>-6</sup> | -9.96 ± 2.04  | 1.1x10 <sup>-6</sup> | -9.26 ± 1.88  | 0.92 ± 1.88  | 9.0x10 <sup>-7</sup> |
| CCI-web <sup>a</sup>                   | 104 | -7.69 (26.78) | 0.0 ± 0.0    | 0.003                | -7.41 ± 2.92  | 0.01                 | -7.0 ± 2.45   | 1.75 ± 1.23  | 0.004                |
| CCI-onsite <sup>a</sup>                | 114 | -11.4 (31.93) | 1.75 ± 1.24  | 0.0001               | -12.34 ± 2.83 | 1.2x10 <sup>-5</sup> | -11.35 ± 2.82 | 0.0 ± 0.0    | 5.6x10 <sup>-5</sup> |
| Usual care <sup>a</sup>                | 78  | 0.0 (28.87)   | 15.07 ± 4.22 | 1                    | 1.13 ± 3.72   | 0.76                 | 0.87 ± 3.17   | 15.07 ± 4.21 | 0.78                 |
| CCI-web vs. CCI-onsite <sup>b</sup>    |     | 3.71 ± 3.98   |              | 0.35                 | 4.93 ± 4.06   | 0.22                 | 4.34 ± 3.73   |              | 0.24                 |
| CCI-web vs. usual care <sup>b</sup>    |     | -7.69 ± 4.28  |              | 0.07                 | -8.55 ± 4.77  | 0.07                 | -7.87 ± 4.01  |              | 0.05                 |
| CCI-onsite vs. usual care <sup>b</sup> |     | -11.4 ± 4.51  |              | 0.01                 | -13.48 ± 4.78 | 0.005                | -12.22 ± 4.24 |              | 0.004                |
| CCI-all vs. usual care <sup>b</sup>    |     | -9.63 ± 3.93  |              | 0.01                 | -11.0 ± 4.32  | 0.01                 | -10.13 ± 3.69 |              | 0.006                |

### DPP-4 (%)

|                                        |     |               |              |      |              |      |              |              |      |
|----------------------------------------|-----|---------------|--------------|------|--------------|------|--------------|--------------|------|
| CCI-all education <sup>a</sup>         | 218 | -3.67 (34.42) | 6.42 ± 1.66  | 0.12 | -3.69 ± 2.21 | 0.09 | -3.52 ± 2.21 | 6.29 ± 1.66  | 0.11 |
| CCI-web <sup>a</sup>                   | 104 | -2.88 (35.41) | 6.73 ± 2.47  | 0.41 | -3.1 ± 3.18  | 0.33 | -3.42 ± 3.29 | 6.65 ± 2.44  | 0.3  |
| CCI-onsite <sup>a</sup>                | 114 | -4.39 (33.63) | 6.14 ± 2.26  | 0.16 | -4.24 ± 3.07 | 0.17 | -3.61 ± 2.99 | 5.96 ± 2.27  | 0.23 |
| Usual care <sup>a</sup>                | 78  | 2.74 (23.41)  | 10.96 ± 3.68 | 0.32 | 2.97 ± 4.05  | 0.46 | 2.64 ± 2.92  | 10.74 ± 3.51 | 0.37 |
| CCI-web vs. CCI-onsite <sup>b</sup>    |     | 1.5 ± 4.69    |              | 0.75 | 1.14 ± 4.42  | 0.8  | 0.19 ± 4.45  |              | 0.97 |
| CCI-web vs. usual care <sup>b</sup>    |     | -5.62 ± 4.42  |              | 0.2  | -6.07 ± 5.19 | 0.24 | -6.06 ± 4.4  |              | 0.17 |
| CCI-onsite vs. usual care <sup>b</sup> |     | -7.13 ± 4.17  |              | 0.09 | -7.21 ± 5.2  | 0.17 | -6.25 ± 4.18 |              | 0.13 |
| CCI-all vs. usual care <sup>b</sup>    |     | -6.41 ± 3.6   |              | 0.07 | -6.64 ± 4.7  | 0.16 | -6.16 ± 3.66 |              | 0.09 |

### GLP-1 (%)

|                                        |     |               |              |      |              |      |              |              |      |
|----------------------------------------|-----|---------------|--------------|------|--------------|------|--------------|--------------|------|
| CCI-all education <sup>a</sup>         | 218 | 0.92 (34.6)   | 13.76 ± 2.34 | 0.7  | 1.15 ± 2.31  | 0.62 | 0.98 ± 2.3   | 14.4 ± 2.29  | 0.67 |
| CCI-web <sup>a</sup>                   | 104 | -0.96 (32.67) | 10.58 ± 3.03 | 0.76 | -0.26 ± 3.33 | 0.94 | -1.14 ± 3.25 | 11.21 ± 3.07 | 0.73 |
| CCI-onsite <sup>a</sup>                | 114 | 2.63 (36.34)  | 16.67 ± 3.51 | 0.44 | 2.47 ± 3.22  | 0.44 | 2.95 ± 3.26  | 17.35 ± 3.37 | 0.37 |
| Usual care <sup>a</sup>                | 78  | 2.74 (33.22)  | 19.18 ± 4.64 | 0.48 | 2.09 ± 4.23  | 0.62 | 2.94 ± 3.84  | 17.02 ± 4.39 | 0.44 |
| CCI-web vs. CCI-onsite <sup>b</sup>    |     | -3.59 ± 4.67  |              | 0.44 | -2.73 ± 4.62 | 0.55 | -4.09 ± 4.6  |              | 0.37 |
| CCI-web vs. usual care <sup>b</sup>    |     | -3.7 ± 5.04   |              | 0.46 | -2.35 ± 5.43 | 0.67 | -4.08 ± 5.03 |              | 0.42 |
| CCI-onsite vs. usual care <sup>b</sup> |     | -0.11 ± 5.17  |              | 0.98 | 0.38 ± 5.44  | 0.94 | 0.01 ± 5.04  |              | 0.99 |
| CCI-all vs. usual care <sup>b</sup>    |     | -1.82 ± 4.54  |              | 0.69 | -0.99 ± 4.91 | 0.84 | -1.96 ± 4.48 |              | 0.66 |

### Metformin (%)

|                                |     |               |              |      |             |      |              |              |      |
|--------------------------------|-----|---------------|--------------|------|-------------|------|--------------|--------------|------|
| CCI-all education <sup>a</sup> | 218 | -7.34 (46.45) | 64.22 ± 3.25 | 0.02 | -7.14 ± 3.0 | 0.02 | -6.34 ± 3.06 | 65.18 ± 3.14 | 0.04 |
|--------------------------------|-----|---------------|--------------|------|-------------|------|--------------|--------------|------|

|                                        |     |               |              |      |              |      |              |              |      |
|----------------------------------------|-----|---------------|--------------|------|--------------|------|--------------|--------------|------|
| CCI-web <sup>a</sup>                   | 104 | -7.69 (47.65) | 63.46 ± 4.74 | 0.1  | -6.7 ± 4.33  | 0.12 | -5.96 ± 4.51 | 63.74 ± 4.59 | 0.19 |
| CCI-onsite <sup>a</sup>                | 114 | -7.02 (45.54) | 64.91 ± 4.49 | 0.1  | -7.55 ± 4.18 | 0.07 | -6.69 ± 4.13 | 66.52 ± 4.33 | 0.11 |
| Usual care <sup>a</sup>                | 78  | 0.0 (37.27)   | 61.64 ± 5.73 | 1    | 0.83 ± 5.5   | 0.88 | -0.08 ± 4.55 | 60.67 ± 5.61 | 0.99 |
| CCI-web vs. CCI-onsite <sup>b</sup>    |     | -0.67 ± 6.33  |              | 0.92 | 0.85 ± 6.01  | 0.89 | 0.73 ± 6.12  |              | 0.91 |
| CCI-web vs. usual care <sup>b</sup>    |     | -7.69 ± 6.39  |              | 0.23 | -7.52 ± 7.06 | 0.29 | -5.88 ± 6.41 |              | 0.36 |
| CCI-onsite vs. usual care <sup>b</sup> |     | -7.02 ± 6.1   |              | 0.25 | -8.37 ± 7.07 | 0.24 | -6.61 ± 6.15 |              | 0.28 |
| CCI-all vs. usual care <sup>b</sup>    |     | -7.34 ± 5.38  |              | 0.17 | -7.95 ± 6.38 | 0.21 | -6.26 ± 5.48 |              | 0.25 |

### Statin (%)

|                                        |     |               |              |       |               |       |               |              |      |
|----------------------------------------|-----|---------------|--------------|-------|---------------|-------|---------------|--------------|------|
| CCI-all education <sup>a</sup>         | 218 | -3.67 (34.42) | 48.17 ± 3.39 | 0.12  | -3.64 ± 2.42  | 0.13  | -3.28 ± 2.35  | 46.66 ± 3.23 | 0.16 |
| CCI-web <sup>a</sup>                   | 104 | -3.85 (36.67) | 47.12 ± 4.92 | 0.28  | -3.65 ± 3.5   | 0.3   | -2.76 ± 3.56  | 44.81 ± 4.67 | 0.44 |
| CCI-onsite <sup>a</sup>                | 114 | -3.51 (32.4)  | 49.12 ± 4.7  | 0.25  | -3.64 ± 3.37  | 0.28  | -3.75 ± 3.12  | 48.37 ± 4.5  | 0.23 |
| Usual care <sup>a</sup>                | 73  | 9.59 (37.88)  | 64.38 ± 5.64 | 0.03  | 9.51 ± 4.3    | 0.03  | 8.77 ± 4.3    | 67.38 ± 5.42 | 0.04 |
| CCI-web vs. CCI-onsite <sup>b</sup>    |     | -0.34 ± 4.7   |              | 0.94  | -0.01 ± 4.85  | 0.99  | 0.99 ± 4.73   |              | 0.83 |
| CCI-web vs. usual care <sup>b</sup>    |     | -13.44 ± 5.71 |              | 0.02  | -13.15 ± 5.59 | 0.02  | -11.53 ± 5.58 |              | 0.04 |
| CCI-onsite vs. usual care <sup>b</sup> |     | -13.1 ± 5.37  |              | 0.01  | -13.15 ± 5.58 | 0.02  | -12.53 ± 5.31 |              | 0.02 |
| CCI-all vs. usual care <sup>b</sup>    |     | -13.26 ± 5.01 |              | 0.008 | -13.15 ± 5.02 | 0.009 | -12.05 ± 4.9  |              | 0.01 |

### Blood pressure medication (%)

|                                        |     |                |              |                      |               |                      |               |              |                      |
|----------------------------------------|-----|----------------|--------------|----------------------|---------------|----------------------|---------------|--------------|----------------------|
| CCI-all education <sup>a</sup>         | 218 | -11.93 (42.34) | 56.42 ± 3.37 | 3.2x10 <sup>-5</sup> | -11.94 ± 2.89 | 3.6x10 <sup>-5</sup> | -11.37 ± 2.84 | 55.75 ± 3.3  | 6.3x10 <sup>-5</sup> |
| CCI-web <sup>a</sup>                   | 104 | -9.62 (40.67)  | 55.77 ± 4.89 | 0.02                 | -9.85 ± 4.16  | 0.02                 | -9.8 ± 4.01   | 55.24 ± 4.75 | 0.01                 |
| CCI-onsite <sup>a</sup>                | 114 | -14.04 (43.88) | 57.02 ± 4.66 | 0.0006               | -13.87 ± 4.01 | 0.0005               | -12.82 ± 4.02 | 56.22 ± 4.61 | 0.001                |
| Usual care <sup>a</sup>                | 73  | 9.59 (41.38)   | 60.27 ± 5.77 | 0.05                 | 9.62 ± 5.12   | 0.06                 | 8.34 ± 4.82   | 61.18 ± 5.6  | 0.08                 |
| CCI-web vs. CCI-onsite <sup>b</sup>    |     | 4.42 ± 5.73    |              | 0.44                 | 4.02 ± 5.78   | 0.49                 | 3.01 ± 5.68   |              | 0.6                  |
| CCI-web vs. usual care <sup>b</sup>    |     | -19.2 ± 6.27   |              | 0.002                | -19.53 ± 6.66 | 0.004                | -18.14 ± 6.27 |              | 0.004                |
| CCI-onsite vs. usual care <sup>b</sup> |     | -23.62 ± 6.35  |              | 0.0002               | -23.55 ± 6.64 | 0.0005               | -21.15 ± 6.27 |              | 0.0007               |
| CCI-all vs. usual care <sup>b</sup>    |     | -21.52 ± 5.63  |              | 0.0001               | -21.55 ± 5.98 | 0.0004               | -19.7 ± 5.59  |              | 0.0004               |

### ACE or ARB (%)

|                                        |     |               |              |      |              |      |              |              |      |
|----------------------------------------|-----|---------------|--------------|------|--------------|------|--------------|--------------|------|
| CCI-all education <sup>a</sup>         | 218 | 0.92 (27.14)  | 28.9 ± 3.08  | 0.62 | 1.53 ± 1.88  | 0.42 | 0.68 ± 1.86  | 29.95 ± 2.94 | 0.71 |
| CCI-web <sup>a</sup>                   | 104 | -0.96 (26.05) | 29.81 ± 4.51 | 0.71 | -0.49 ± 2.71 | 0.86 | -1.18 ± 2.62 | 31.26 ± 4.3  | 0.65 |
| CCI-onsite <sup>a</sup>                | 114 | 2.63 (28.1)   | 28.07 ± 4.23 | 0.32 | 3.4 ± 2.62   | 0.19 | 2.41 ± 2.63  | 28.73 ± 4.04 | 0.36 |
| Usual care <sup>a</sup>                | 73  | 5.48 (28.34)  | 21.92 ± 4.88 | 0.1  | 3.66 ± 3.34  | 0.27 | 4.94 ± 3.29  | 23.37 ± 4.73 | 0.13 |
| CCI-web vs. CCI-onsite <sup>b</sup>    |     | -3.59 ± 3.67  |              | 0.33 | -3.89 ± 3.76 | 0.3  | -3.59 ± 3.71 |              | 0.33 |
| CCI-web vs. usual care <sup>b</sup>    |     | -6.44 ± 4.19  |              | 0.12 | -4.09 ± 4.34 | 0.35 | -6.13 ± 4.21 |              | 0.15 |
| CCI-onsite vs. usual care <sup>b</sup> |     | -2.85 ± 4.23  |              | 0.5  | -0.19 ± 4.33 | 0.96 | -2.54 ± 4.21 |              | 0.55 |
| CCI-all vs. usual care <sup>b</sup>    |     | -4.56 ± 3.79  |              | 0.23 | -2.13 ± 3.9  | 0.59 | -4.26 ± 3.78 |              | 0.26 |

**Diuretics (%)**

|                                        |     |                |              |        |               |        |               |              |        |
|----------------------------------------|-----|----------------|--------------|--------|---------------|--------|---------------|--------------|--------|
| CCI-all education <sup>a</sup>         | 218 | -9.63 (41.28)  | 31.65 ± 3.16 | 0.0006 | -9.52 ± 2.69  | 0.0004 | -9.55 ± 2.73  | 31.17 ± 3.07 | 0.0005 |
| CCI-web <sup>a</sup>                   | 104 | -10.58 (39.21) | 30.77 ± 4.55 | 0.006  | -10.84 ± 3.88 | 0.005  | -10.53 ± 3.81 | 29.86 ± 4.42 | 0.006  |
| CCI-onsite <sup>a</sup>                | 114 | -8.77 (43.24)  | 32.46 ± 4.4  | 0.04   | -8.3 ± 3.74   | 0.03   | -8.65 ± 3.9   | 32.38 ± 4.29 | 0.03   |
| Usual care <sup>a</sup>                | 73  | 5.48 (32.87)   | 30.14 ± 5.41 | 0.16   | 5.15 ± 4.77   | 0.28   | 3.16 ± 4.07   | 33.04 ± 5.3  | 0.44   |
| CCI-web vs. CCI-onsite <sup>b</sup>    |     | -1.81 ± 5.58   |              | 0.75   | -2.53 ± 5.39  | 0.64   | -1.88 ± 5.45  |              | 0.73   |
| CCI-web vs. usual care <sup>b</sup>    |     | -16.06 ± 5.44  |              | 0.003  | -15.95 ± 6.21 | 0.01   | -13.69 ± 5.57 |              | 0.01   |
| CCI-onsite vs. usual care <sup>b</sup> |     | -14.25 ± 5.59  |              | 0.01   | -13.42 ± 6.2  | 0.03   | -11.81 ± 5.64 |              | 0.04   |
| CCI-all vs. usual care <sup>b</sup>    |     | -15.11 ± 4.76  |              | 0.001  | -14.68 ± 5.58 | 0.009  | -12.71 ± 4.9  |              | 0.009  |

<sup>a</sup> Means (standard deviations) are presented. Sample sizes, means, and significance levels refer to subjects with baseline and one-year measurements for *completers*, and to 349 subjects (262 intervention and 87 usual care) for *all starters*. Significance levels for *completers* refer to one-sample t-test with or without adjustment. Untransformed triglyceride and hsC-reactive protein values are presented, however, their statistical significances were based on their log-transformed values. All CC refers to the CCI-web and CCI-onsite combined.

<sup>b</sup> Mean differences ± one standard error. Significance levels refer to two-sample t-test or analysis of covariance for the differences.

<sup>c</sup> Adjusted for sex, age, baseline BMI, baseline insulin use (user vs. non-user), and African-American race.

<sup>d</sup> Imputed values based on 700 iterations from multivariate normal regression.

<sup>e</sup> A significance level of  $P < 0.0017$  ensures overall simultaneous significance of  $P \leq 0.05$  over the 30 variables using Bonferroni correction.

**Table S3. Effect of the intervention during the first 70 and next 295 days.**

|                                                                             | N   | 1 year            | Mean change $\pm$ SE |                    | Significance of change <sup>d</sup> |                       |                       | % Effect of first 70 days |
|-----------------------------------------------------------------------------|-----|-------------------|----------------------|--------------------|-------------------------------------|-----------------------|-----------------------|---------------------------|
|                                                                             |     |                   | First 70 days        | Next 295 days      | 1 year                              | First 70 days         | Next 295 days         |                           |
| <b><math>\Delta</math>Beta-hydroxybutyrate (mmol·L<sup>-1</sup>)</b>        |     |                   |                      |                    |                                     |                       |                       |                           |
| All starters (Dropouts imputed) <sup>a</sup>                                | 262 | 0.12 $\pm$ 0.02   | 0.37 $\pm$ 0.04      | -0.24 $\pm$ 0.04   | 5.8x10 <sup>-7</sup>                | <10 <sup>-16</sup>    | 1.3x10 <sup>-10</sup> | 296%                      |
| Completers                                                                  |     |                   |                      |                    |                                     |                       |                       |                           |
| CCI-all education <sup>b</sup>                                              | 172 | 0.13 $\pm$ 0.03   | 0.37 $\pm$ 0.04      | -0.24 $\pm$ 0.04   | 7.3x10 <sup>-7</sup>                | <10 <sup>-16</sup>    | 4.9x10 <sup>-9</sup>  | 278%                      |
| CCI-web <sup>b</sup>                                                        | 79  | 0.14 $\pm$ 0.04   | 0.34 $\pm$ 0.06      | -0.2 $\pm$ 0.06    | 0.0003                              | 2.0x10 <sup>-8</sup>  | 0.0005                | 244%                      |
| CCI-onsite <sup>b</sup>                                                     | 93  | 0.13 $\pm$ 0.04   | 0.4 $\pm$ 0.06       | -0.27 $\pm$ 0.06   | 0.0006                              | 4.6x10 <sup>-12</sup> | 2.1x10 <sup>-6</sup>  | 309%                      |
| Difference: web-onsite <sup>c</sup>                                         |     | 0.01 $\pm$ 0.05   | -0.06 $\pm$ 0.08     | 0.07 $\pm$ 0.08    |                                     |                       |                       |                           |
| <b><math>\Delta</math>Hemoglobin A<sub>1c</sub> (mmol·mol<sup>-1</sup>)</b> |     |                   |                      |                    |                                     |                       |                       |                           |
| All starters (Dropouts imputed) <sup>a</sup>                                | 262 | -14.21 $\pm$ 0.98 | -12.02 $\pm$ 0.77    | -2.3 $\pm$ 0.55    | <10 <sup>-16</sup>                  | <10 <sup>-16</sup>    | 7.7x10 <sup>-5</sup>  | 84%                       |
| Completers                                                                  |     |                   |                      |                    |                                     |                       |                       |                           |
| CCI-all education <sup>b</sup>                                              | 199 | -14.1 $\pm$ 0.98  | -11.91 $\pm$ 0.87    | -2.3 $\pm$ 0.55    | <10 <sup>-16</sup>                  | <10 <sup>-16</sup>    | 6.2x10 <sup>-5</sup>  | 84%                       |
| CCI-web <sup>b</sup>                                                        | 96  | -13.12 $\pm$ 1.2  | -12.24 $\pm$ 1.09    | -0.77 $\pm$ 0.77   | <10 <sup>-16</sup>                  | <10 <sup>-16</sup>    | 0.3                   | 93%                       |
| CCI-onsite <sup>b</sup>                                                     | 103 | -15.19 $\pm$ 1.64 | -11.59 $\pm$ 1.31    | -3.61 $\pm$ 0.77   | <10 <sup>-16</sup>                  | <10 <sup>-16</sup>    | 5.4x10 <sup>-6</sup>  | 76%                       |
| Difference: web-onsite <sup>c</sup>                                         |     | 2.08 $\pm$ 2.08   | -0.77 $\pm$ 1.64     | 2.84 $\pm$ 1.09†   |                                     |                       |                       |                           |
| <b><math>\Delta</math>Hemoglobin A<sub>1c</sub> (%)</b>                     |     |                   |                      |                    |                                     |                       |                       |                           |
| All starters (Dropouts imputed) <sup>a</sup>                                | 262 | -1.30 $\pm$ 0.09  | -1.1 $\pm$ 0.07      | -0.21 $\pm$ 0.05   | <10 <sup>-16</sup>                  | <10 <sup>-16</sup>    | 7.7x10 <sup>-5</sup>  | 84%                       |
| Completers                                                                  |     |                   |                      |                    |                                     |                       |                       |                           |
| CCI-all education <sup>b</sup>                                              | 199 | -1.29 $\pm$ 0.09  | -1.09 $\pm$ 0.08     | -0.21 $\pm$ 0.05   | <10 <sup>-16</sup>                  | <10 <sup>-16</sup>    | 6.2x10 <sup>-5</sup>  | 84%                       |
| CCI-web <sup>b</sup>                                                        | 96  | -1.20 $\pm$ 0.11  | -1.12 $\pm$ 0.10     | -0.07 $\pm$ 0.07   | <10 <sup>-16</sup>                  | <10 <sup>-16</sup>    | 0.3                   | 93%                       |
| CCI-onsite <sup>b</sup>                                                     | 103 | -1.39 $\pm$ 0.15  | -1.06 $\pm$ 0.12     | -0.33 $\pm$ 0.07   | <10 <sup>-16</sup>                  | <10 <sup>-16</sup>    | 5.4x10 <sup>-6</sup>  | 76%                       |
| Difference: web-onsite <sup>c</sup>                                         |     | 0.19 $\pm$ 0.19   | -0.07 $\pm$ 0.15     | 0.26 $\pm$ 0.10†   |                                     |                       |                       |                           |
| <b><math>\Delta</math>Fasting glucose (mmol·L<sup>-1</sup>)</b>             |     |                   |                      |                    |                                     |                       |                       |                           |
| All starters (Dropouts imputed) <sup>a</sup>                                | 262 | -1.95 $\pm$ 0.23  | -1.76 $\pm$ 0.21     | -0.19 $\pm$ 0.17   | <10 <sup>-16</sup>                  | <10 <sup>-16</sup>    | 0.25                  | 90%                       |
| Completers                                                                  |     |                   |                      |                    |                                     |                       |                       |                           |
| CCI-all education <sup>b</sup>                                              | 196 | -1.97 $\pm$ 0.23  | -1.76 $\pm$ 0.22     | -0.2 $\pm$ 0.15    | <10 <sup>-16</sup>                  | 8.9x10 <sup>-16</sup> | 0.17                  | 89%                       |
| CCI-web <sup>b</sup>                                                        | 95  | -1.89 $\pm$ 0.31  | -1.51 $\pm$ 0.27     | -0.38 $\pm$ 0.17   | 8.6x10 <sup>-10</sup>               | 2.6x10 <sup>-8</sup>  | 0.03                  | 79%                       |
| CCI-onsite <sup>b</sup>                                                     | 101 | -2.04 $\pm$ 0.34  | -2.01 $\pm$ 0.34     | -0.03 $\pm$ 0.24   | 1.6x10 <sup>-9</sup>                | 3.5x10 <sup>-9</sup>  | 0.89                  | 98%                       |
| Difference: web-onsite <sup>c</sup>                                         |     | 0.16 $\pm$ 0.46   | 0.5 $\pm$ 0.43       | -0.35 $\pm$ 0.29   |                                     |                       |                       |                           |
| <b><math>\Delta</math>Insulin, all (pmol·L<sup>-1</sup>)</b>                |     |                   |                      |                    |                                     |                       |                       |                           |
| All starters (Dropouts imputed) <sup>a</sup>                                | 262 | -73.62 $\pm$ 12.5 | -59.24 $\pm$ 7.92    | -14.38 $\pm$ 12.08 | 4.3x10 <sup>-9</sup>                | 6.1x10 <sup>-14</sup> | 0.23                  | 81%                       |



|                                                                      |     |                |                |                |                       |                       |       |      |
|----------------------------------------------------------------------|-----|----------------|----------------|----------------|-----------------------|-----------------------|-------|------|
| Completers                                                           |     |                |                |                |                       |                       |       |      |
| CCI-all education <sup>b</sup>                                       | 172 | -74.45 ± 13.68 | -63.82 ± 8.89  | -10.63 ± 12.78 | 5.1x10 <sup>-8</sup>  | 6.5x10 <sup>-13</sup> | 0.41  | 85%  |
| CCI-web <sup>b</sup>                                                 | 79  | -48.96 ± 23.82 | -66.05 ± 11.18 | 17.15 ± 23.89  | 0.04                  | 3.4x10 <sup>-9</sup>  | 0.47  | 135% |
| CCI-onsite <sup>b</sup>                                              | 93  | -96.19 ± 14.86 | -61.95 ± 13.47 | -34.24 ± 11.74 | 1.0x10 <sup>-10</sup> | 4.1x10 <sup>-6</sup>  | 0.004 | 64%  |
| Difference: web-onsite <sup>c</sup>                                  |     | 47.23 ± 28.13  | -4.1 ± 17.5    | 51.39 ± 26.6*  |                       |                       |       |      |
| <b>ΔInsulin, excluding exogenous users (pmol·L<sup>-1</sup>)</b>     |     |                |                |                |                       |                       |       |      |
| All starters (Dropouts imputed) <sup>a</sup>                         | 262 | -12.73 ± 1.57  | -9.31 ± 1.37   | -3.42 ± 1.22   | 6.6x10 <sup>-16</sup> | 1.0x10 <sup>-11</sup> | 0.005 | 73%  |
| Completers                                                           |     |                |                |                |                       |                       |       |      |
| CCI-all education <sup>b</sup>                                       | 123 | -13.01 ± 1.43  | -9.38 ± 1.41   | -3.63 ± 1.31   | <10 <sup>-16</sup>    | 2.7x10 <sup>-11</sup> | 0.005 | 72%  |
| CCI-web <sup>b</sup>                                                 | 53  | -10.56 ± 1.50  | -10.21 ± 2.16  | -0.35 ± 1.32   | 1.8x10 <sup>-12</sup> | 2.4x10 <sup>-6</sup>  | 0.79  | 96%  |
| CCI-onsite <sup>b</sup>                                              | 70  | -14.87 ± 2.23  | -8.75 ± 1.86   | -6.12 ± 2.02   | 2.7x10 <sup>-11</sup> | 2.7x10 <sup>-11</sup> | 0.002 | 58%  |
| Difference: web-onsite <sup>c</sup>                                  |     | 4.31 ± 2.69    | -1.46 ± 2.86   | 5.77 ± 2.42*   |                       |                       |       |      |
| <b>ΔC-peptide (nmol·L<sup>-1</sup>)</b>                              |     |                |                |                |                       |                       |       |      |
| All starters (Dropouts imputed) <sup>a</sup>                         | 262 | -0.33 ± 0.04   | -0.22 ± 0.04   | -0.12 ± 0.04   | 2.2x10 <sup>-16</sup> | 2.6x10 <sup>-9</sup>  | 0.001 | 64%  |
| Completers                                                           |     |                |                |                |                       |                       |       |      |
| CCI-all education <sup>b</sup>                                       | 171 | -0.34 ± 0.04   | -0.22 ± 0.04   | -0.12 ± 0.04   | 2.0x10 <sup>-15</sup> | 2.3x10 <sup>-7</sup>  | 0.001 | 65%  |
| CCI-web <sup>b</sup>                                                 | 79  | -0.38 ± 0.06   | -0.29 ± 0.07   | -0.08 ± 0.05   | 4.9x10 <sup>-11</sup> | 5.1x10 <sup>-6</sup>  | 0.11  | 78%  |
| CCI-onsite <sup>b</sup>                                              | 92  | -0.31 ± 0.06   | -0.15 ± 0.06   | -0.15 ± 0.05   | 9.0x10 <sup>-7</sup>  | 0.005                 | 0.004 | 50%  |
| Difference: web-onsite <sup>c</sup>                                  |     | -0.07 ± 0.09   | -0.14 ± 0.09   | 0.07 ± 0.08    |                       |                       |       |      |
| <b>ΔHOMA-IR (insulin derived), all</b>                               |     |                |                |                |                       |                       |       |      |
| All starters (Dropouts imputed) <sup>a</sup>                         | 262 | -5.58 ± 0.86   | -4.96 ± 0.65   | -0.62 ± 0.62   | 7.5x10 <sup>-11</sup> | 3.2x10 <sup>-14</sup> | 0.31  | 89%  |
| Completers                                                           |     |                |                |                |                       |                       |       |      |
| CCI-all education <sup>b</sup>                                       | 160 | -5.5 ± 0.93    | -5.16 ± 0.7    | -0.34 ± 0.62   | 3.8x10 <sup>-9</sup>  | 1.5x10 <sup>-13</sup> | 0.59  | 94%  |
| CCI-web <sup>b</sup>                                                 | 74  | -4.09 ± 1.43   | -4.58 ± 0.84   | 0.5 ± 1.24     | 0.004                 | 5.0x10 <sup>-8</sup>  | 0.69  | 112% |
| CCI-onsite <sup>b</sup>                                              | 86  | -6.72 ± 1.21   | -5.66 ± 1.08   | -1.06 ± 0.44   | 3.2x10 <sup>-8</sup>  | 1.7x10 <sup>-7</sup>  | 0.02  | 84%  |
| Difference: web-onsite <sup>c</sup>                                  |     | 2.63 ± 1.88    | 1.07 ± 1.37    | 1.55 ± 1.31    |                       |                       |       |      |
| <b>ΔHOMA-IR (insulin derived), excluding exogenous insulin users</b> |     |                |                |                |                       |                       |       |      |
| All starters (Dropouts imputed) <sup>a</sup>                         | 262 | -6.82 ± 0.9    | -5.93 ± 0.85   | -0.88 ± 0.32   | 3.2x10 <sup>-14</sup> | 3.1x10 <sup>-12</sup> | 0.006 | 87%  |
| Completers                                                           |     |                |                |                |                       |                       |       |      |
| CCI-all education <sup>b</sup>                                       | 123 | -13.01 ± 1.43  | -9.38 ± 1.41   | -3.63 ± 1.31   | 1.8x10 <sup>-12</sup> | 2.7x10 <sup>-11</sup> | 0.005 | 72%  |
| CCI-web <sup>b</sup>                                                 | 53  | -10.56 ± 1.50  | -10.21 ± 2.16  | -0.35 ± 1.32   | 1.8x10 <sup>-12</sup> | 2.0x10 <sup>-6</sup>  | 0.79  | 97%  |
| CCI-onsite <sup>b</sup>                                              | 70  | -14.87 ± 2.23  | -8.75 ± 1.86   | -6.12 ± 2.02   | 2.7x10 <sup>-11</sup> | 2.7x10 <sup>-6</sup>  | 0.002 | 59%  |
| Difference: web-onsite <sup>c</sup>                                  |     | 4.31 ± 2.69    | -1.46 ± 2.86   | 5.77 ± 2.42*   |                       |                       |       |      |

**ΔHOMA-IR (C-peptide derived)**

|                                              |     |              |              |              |                       |                       |        |     |
|----------------------------------------------|-----|--------------|--------------|--------------|-----------------------|-----------------------|--------|-----|
| All starters (Dropouts imputed) <sup>a</sup> | 262 | -3.45 ± 0.46 | -2.57 ± 0.37 | -0.88 ± 0.32 | 1.0x10 <sup>-13</sup> | 3.1x10 <sup>-12</sup> | 0.006  | 74% |
| Completers                                   |     |              |              |              |                       |                       |        |     |
| CCI-all education <sup>b</sup>               | 150 | -3.54 ± 0.45 | -2.58 ± 0.41 | -0.97 ± 0.26 | 4.0x10 <sup>-15</sup> | 2.8x10 <sup>-10</sup> | 0.0002 | 73% |
| CCI-web <sup>b</sup>                         | 69  | -3.47 ± 0.67 | -2.74 ± 0.62 | -0.73 ± 0.4  | 2.2x10 <sup>-7</sup>  | 8.4x10 <sup>-6</sup>  | 0.07   | 79% |
| CCI-onsite <sup>b</sup>                      | 81  | -3.6 ± 0.61  | -2.44 ± 0.55 | -1.17 ± 0.35 | 4.2x10 <sup>-9</sup>  | 8.9x10 <sup>-6</sup>  | 0.0007 | 68% |
| Difference: web-onsite <sup>c</sup>          |     | 0.13 ± 0.91  | -0.31 ± 0.82 | 0.44 ± 0.53  |                       |                       |        |     |

**ΔWeight-clinic (kg)**

|                                              |     |               |              |               |                    |                    |                        |     |
|----------------------------------------------|-----|---------------|--------------|---------------|--------------------|--------------------|------------------------|-----|
| All starters (Dropouts imputed) <sup>a</sup> | 262 | -13.8 ± 0.71  | -8.58 ± 0.35 | -5.22 ± 0.55  | <10 <sup>-16</sup> | <10 <sup>-16</sup> | <10 <sup>-16</sup>     | 62% |
| Completers                                   |     |               |              |               |                    |                    |                        |     |
| CCI-all education <sup>b</sup>               | 161 | -14.08 ± 0.81 | -8.92 ± 0.39 | -11.38 ± 1.3  | <10 <sup>-16</sup> | <10 <sup>-16</sup> | <10 <sup>-16</sup>     | 63% |
| CCI-web <sup>b</sup>                         | 61  | -13.17 ± 1.2  | -9.55 ± 0.57 | -7.98 ± 2.01  | <10 <sup>-16</sup> | <10 <sup>-16</sup> | 7.1x10 <sup>-5</sup>   | 73% |
| CCI-onsite <sup>b</sup>                      | 100 | -13.17 ± 1.2  | -8.54 ± 0.52 | -13.45 ± 1.67 | <10 <sup>-16</sup> | <10 <sup>-16</sup> | 8.9 x10 <sup>-16</sup> | 58% |
| Difference: web-onsite <sup>c</sup>          |     | 1.47 ± 1.61   | -1.01 ± 0.77 | 5.48 ± 2.61*  | <10 <sup>-16</sup> | <10 <sup>-16</sup> | <10 <sup>-16</sup>     | 63% |

**ΔWeight-home scale (kg)**

|                                              |     |               |              |              |                    |                    |                    |     |
|----------------------------------------------|-----|---------------|--------------|--------------|--------------------|--------------------|--------------------|-----|
| All starters (Dropouts imputed) <sup>a</sup> | 262 | -14.36 ± 0.71 | -8.63 ± 0.33 | -5.73 ± 0.54 | <10 <sup>-16</sup> | <10 <sup>-16</sup> | <10 <sup>-16</sup> | 60% |
| Completers                                   |     |               |              |              |                    |                    |                    |     |
| CCI-all education <sup>b</sup>               | 218 | -15.61 ± 0.73 | -8.06 ± 0.29 | -7.54 ± 0.56 | <10 <sup>-16</sup> | <10 <sup>-16</sup> | <10 <sup>-16</sup> | 51% |
| CCI-web <sup>b</sup>                         | 104 | -15.43 ± 1.04 | -8.24 ± 0.4  | -7.19 ± 0.84 | <10 <sup>-16</sup> | <10 <sup>-16</sup> | <10 <sup>-16</sup> | 53% |
| CCI-onsite <sup>b</sup>                      | 114 | -15.77 ± 1.03 | -7.91 ± 0.42 | -7.86 ± 0.76 | <10 <sup>-16</sup> | <10 <sup>-16</sup> | <10 <sup>-16</sup> | 50% |
| Difference: web-onsite <sup>c</sup>          |     | 0.34 ± 1.47   | -0.33 ± 0.58 | 0.66 ± 1.13  |                    |                    |                    |     |

**ΔBMI-clinic (kg/m<sup>2</sup>)**

|                                              |     |              |              |              |                    |                    |                      |     |
|----------------------------------------------|-----|--------------|--------------|--------------|--------------------|--------------------|----------------------|-----|
| All starters (Dropouts imputed) <sup>a</sup> | 262 | -4.74 ± 0.25 | -2.92 ± 0.12 | -1.83 ± 0.19 | <10 <sup>-16</sup> | <10 <sup>-16</sup> | <10 <sup>-16</sup>   | 62% |
| Completers                                   |     |              |              |              |                    |                    |                      |     |
| CCI-all education <sup>b</sup>               | 161 | -4.93 ± 0.29 | -3.11 ± 0.14 | -1.83 ± 0.21 | <10 <sup>-16</sup> | <10 <sup>-16</sup> | <10 <sup>-16</sup>   | 63% |
| CCI-web <sup>b</sup>                         | 61  | -4.52 ± 0.41 | -3.25 ± 0.19 | -1.27 ± 0.31 | <10 <sup>-16</sup> | <10 <sup>-16</sup> | 3.9x10 <sup>-5</sup> | 71% |
| CCI-onsite <sup>b</sup>                      | 100 | -5.18 ± 0.39 | -3.02 ± 0.19 | -2.16 ± 0.27 | <10 <sup>-16</sup> | <10 <sup>-16</sup> | 2.2x10 <sup>-5</sup> | 58% |
| Difference: web-onsite <sup>c</sup>          |     | 0.66 ± 0.57  | -0.23 ± 0.27 | 0.89 ± 0.41  |                    |                    |                      |     |

**ΔSystolic blood pressure (mmHg)**

|                                              |     |              |               |              |                      |                      |      |      |
|----------------------------------------------|-----|--------------|---------------|--------------|----------------------|----------------------|------|------|
| All starters (Dropouts imputed) <sup>a</sup> | 262 | -6.36 ± 1.12 | -5.35 ± 1.08  | -1.01 ± 1.08 | 1.3x10 <sup>-8</sup> | 6.7x10 <sup>-7</sup> | 0.35 | 84%  |
| Completers                                   |     |              |               |              |                      |                      |      |      |
| CCI-all education <sup>b</sup>               | 164 | -6.28 ± 1.2  | -5.52 ± 1.24  | -0.76 ± 1.09 | 1.5x10 <sup>-7</sup> | 7.7x10 <sup>-6</sup> | 0.49 | 88%  |
| CCI-web <sup>b</sup>                         | 64  | -6.34 ± 1.72 | -9.66 ± 1.92  | 3.31 ± 1.77  | 0.0002               | 5.1x10 <sup>-7</sup> | 0.06 | 152% |
| CCI-onsite <sup>b</sup>                      | 100 | -6.24 ± 1.63 | -2.88 ± 1.56  | -3.36 ± 1.33 | 0.0001               | 0.06                 | 0.01 | 46%  |
| Difference: web-onsite <sup>c</sup>          |     | -0.1 ± 2.37  | -6.78 ± 2.48† | 6.67 ± 2.22† |                      |                      |      |      |

**ΔDiastolic blood pressure (mmHg)**

|                                              |     |              |               |             |                      |                      |        |      |
|----------------------------------------------|-----|--------------|---------------|-------------|----------------------|----------------------|--------|------|
| All starters (Dropouts imputed) <sup>a</sup> | 262 | -3.51 ± 0.65 | -4.03 ± 0.62  | 0.51 ± 0.6  | 7.2x10 <sup>-8</sup> | 7.0x10 <sup>-8</sup> | 0.4    | 115% |
| Completers                                   |     |              |               |             |                      |                      |        |      |
| CCI-all education <sup>b</sup>               | 164 | -3.27 ± 0.72 | -3.77 ± 0.71  | 0.5 ± 0.62  | 4.9x10 <sup>-6</sup> | 1.1x10 <sup>-7</sup> | 0.42   | 115% |
| CCI-web <sup>b</sup>                         | 64  | -2.44 ± 1.21 | -5.5 ± 1.1    | 3.06 ± 0.87 | 0.04                 | 5.2x10 <sup>-7</sup> | 0.0004 | 226% |
| CCI-onsite <sup>b</sup>                      | 100 | -3.8 ± 0.88  | -2.66 ± 0.92  | -1.14 ± 0.8 | 1.6x10 <sup>-5</sup> | 0.004                | 0.16   | 70%  |
| Difference: web-onsite <sup>c</sup>          |     | 1.36 ± 1.5   | -2.84 ± 1.43* | 4.2 ± 1.19‡ |                      |                      |        |      |

**ΔTotal cholesterol (mmol·L<sup>-1</sup>)**

|                                              |     |             |              |              |       |      |                      |      |
|----------------------------------------------|-----|-------------|--------------|--------------|-------|------|----------------------|------|
| All starters (Dropouts imputed) <sup>a</sup> | 262 | 0.21 ± 0.07 | -0.15 ± 0.07 | 0.36 ± 0.08  | 0.006 | 0.02 | 1.8x10 <sup>-5</sup> | -74% |
| Completers                                   |     |             |              |              |       |      |                      |      |
| CCI-all education <sup>b</sup>               | 172 | 0.23 ± 0.07 | -0.12 ± 0.07 | 0.36 ± 0.08  | 0.001 | 0.08 | 2.2x10 <sup>-5</sup> | -52% |
| CCI-web <sup>b</sup>                         | 79  | 0.25 ± 0.11 | -0.06 ± 0.10 | 0.31 ± 0.13  | 0.02  | 0.55 | 0.02                 | -25% |
| CCI-onsite <sup>b</sup>                      | 85  | 0.22 ± 0.10 | -0.17 ± 0.09 | 0.40 ± 0.11  | 0.02  | 0.07 | 0.0002               | -79% |
| Difference: web-onsite <sup>c</sup>          |     | 0.03 ± 0.13 | 0.11 ± 0.14  | -0.08 ± 0.17 |       |      |                      |      |

**ΔLDL-C (mmol·L<sup>-1</sup>)**

|                                              |     |             |             |              |                      |      |       |     |
|----------------------------------------------|-----|-------------|-------------|--------------|----------------------|------|-------|-----|
| All starters (Dropouts imputed) <sup>a</sup> | 262 | 0.26 ± 0.06 | 0.06 ± 0.06 | 0.2 ± 0.07   | 5.1x10 <sup>-5</sup> | 0.32 | 0.005 | 22% |
| Completers                                   |     |             |             |              |                      |      |       |     |
| CCI-all education <sup>b</sup>               | 156 | 0.28 ± 0.07 | 0.08 ± 0.06 | 0.20 ± 0.08  | 2.6x10 <sup>-5</sup> | 0.20 | 0.01  | 29% |
| CCI-web <sup>b</sup>                         | 71  | 0.29 ± 0.10 | 0.14 ± 0.10 | 0.15 ± 0.13  | 0.004                | 0.13 | 0.23  | 49% |
| CCI-onsite <sup>b</sup>                      | 85  | 0.27 ± 0.09 | 0.03 ± 0.08 | 0.24 ± 0.10  | 0.003                | 0.75 | 0.01  | 10% |
| Difference: web-onsite <sup>c</sup>          |     | 0.03 ± 0.13 | 0.12 ± 0.13 | -0.09 ± 0.16 |                      |      |       |     |

**ΔApo B (g·L<sup>-1</sup>)**

|                                              |     |              |              |              |      |      |      |       |
|----------------------------------------------|-----|--------------|--------------|--------------|------|------|------|-------|
| All starters (Dropouts imputed) <sup>a</sup> | 262 | -0.02 ± 0.02 | -0.04 ± 0.01 | 0.02 ± 0.02  | 0.37 | 0.01 | 0.3  | 215%  |
| Completers                                   |     |              |              |              |      |      |      |       |
| CCI-all education <sup>b</sup>               | 172 | -0.0 ± 0.02  | -0.03 ± 0.02 | 0.03 ± 0.02  | 0.86 | 0.07 | 0.15 | 931%  |
| CCI-web <sup>b</sup>                         | 79  | 0.0 ± 0.02   | -0.01 ± 0.03 | 0.01 ± 0.03  | 0.92 | 0.67 | 0.66 | -484% |
| CCI-onsite <sup>b</sup>                      | 93  | -0.01 ± 0.03 | -0.05 ± 0.02 | 0.04 ± 0.02  | 0.78 | 0.02 | 0.09 | 568%  |
| Difference: web-onsite <sup>c</sup>          |     | 0.01 ± 0.04  | 0.03 ± 0.03  | -0.02 ± 0.04 |      |      |      |       |

**ΔHDL-C (mmol·L<sup>-1</sup>)**

|                                              |     |             |              |             |                       |      |                       |      |
|----------------------------------------------|-----|-------------|--------------|-------------|-----------------------|------|-----------------------|------|
| All starters (Dropouts imputed) <sup>a</sup> | 262 | 0.2 ± 0.02  | 0.0 ± 0.02   | 0.2 ± 0.02  | <10 <sup>-16</sup>    | 0.88 | <10 <sup>-16</sup>    | 1%   |
| Completers                                   |     |             |              |             |                       |      |                       |      |
| CCI-all education <sup>b</sup>               | 172 | 0.18 ± 0.02 | 0.00 ± 0.02  | 0.18 ± 0.02 | 4.4x10 <sup>-16</sup> | 0.89 | <10 <sup>-16</sup>    | -1%  |
| CCI-web <sup>b</sup>                         | 79  | 0.15 ± 0.04 | -0.05 ± 0.03 | 0.20 ± 0.03 | 3.0x10 <sup>-5</sup>  | 0.12 | 7.7x10 <sup>-10</sup> | -31% |
| CCI-onsite <sup>b</sup>                      | 93  | 0.21 ± 0.03 | 0.03 ± 0.02  | 0.18 ± 0.03 | 6.9x10 <sup>-14</sup> | 0.16 | 1.2x10 <sup>-8</sup>  | 16%  |

|                                                    |     |                |                |                |                       |                       |                      |      |
|----------------------------------------------------|-----|----------------|----------------|----------------|-----------------------|-----------------------|----------------------|------|
| Difference: web-onsite <sup>c</sup>                |     | -0.06 ± 0.05   | -0.08 ± 0.04*  | 0.02 ± 0.04    |                       |                       |                      |      |
| <b>ΔTriglycerides (mmol·L<sup>-1</sup>)</b>        |     |                |                |                |                       |                       |                      |      |
| All starters (Dropouts imputed) <sup>a</sup>       | 262 | -0.54 ± 0.14   | -0.47 ± 0.1    | -0.07 ± 0.11   | <10 <sup>-16</sup>    | 9.0x10 <sup>-11</sup> | 0.0003               | 87%  |
| Completers                                         |     |                |                |                |                       |                       |                      |      |
| CCI-all education <sup>b</sup>                     | 172 | -0.54 ± 0.15   | -0.51 ± 0.12   | -0.03 ± 0.10   | 1.1x10 <sup>-15</sup> | 3.5x10 <sup>-9</sup>  | 0.003                | 69%  |
| CCI-web <sup>b</sup>                               | 79  | -0.33 ± 0.21   | -0.27 ± 0.14   | -0.06 ± 0.18   | 2.0x10 <sup>-5</sup>  | 0.02                  | 0.03                 | 53%  |
| CCI-onsite <sup>b</sup>                            | 93  | -0.71 ± 0.21   | -0.71 ± 0.19   | -0.01 ± 0.10   | 1.2x10 <sup>-12</sup> | 1.5x10 <sup>-9</sup>  | 0.04                 | 79%  |
| Difference: web-onsite <sup>c</sup>                |     | 0.38 ± 0.30    | 0.43 ± 0.24    | 0.05 ± 0.21    |                       |                       |                      |      |
| <b>ΔTotal/HDL-cholesterol</b>                      |     |                |                |                |                       |                       |                      |      |
| All starters (Dropouts imputed) <sup>a</sup>       | 262 | -0.53 ± 0.12   | -0.2 ± 0.1     | -0.33 ± 0.12   | 1.7x10 <sup>-5</sup>  | 0.04                  | 0.004                | 38%  |
| Completers                                         |     |                |                |                |                       |                       |                      |      |
| CCI-all education <sup>b</sup>                     | 172 | -0.44 ± 0.11   | -0.16 ± 0.11   | -0.28 ± 0.11   | 5.3x10 <sup>-5</sup>  | 0.15                  | 0.008                | 36%  |
| CCI-web <sup>b</sup>                               | 79  | -0.33 ± 0.16   | 0.05 ± 0.17    | -0.38 ± 0.17   | 0.04                  | 0.75                  | 0.02                 | -17% |
| CCI-onsite <sup>b</sup>                            | 93  | -0.53 ± 0.15   | -0.33 ± 0.13   | -0.19 ± 0.13   | 0.0003                | 0.01                  | 0.15                 | 63%  |
| Difference: web-onsite <sup>c</sup>                |     | -0.20 ± 0.22   | 0.39 ± 0.22    | -0.19 ± 0.22   |                       |                       |                      |      |
| <b>ΔhsC-reactive protein (nmol·L<sup>-1</sup>)</b> |     |                |                |                |                       |                       |                      |      |
| All starters (Dropouts imputed) <sup>a</sup>       | 262 | -34.29 ± 10.0  | 8.1 ± 6.1      | -42.38 ± 10.76 | 0.0006                | 0.19                  | 7.8x10 <sup>-5</sup> | -24% |
| Completers                                         |     |                |                |                |                       |                       |                      |      |
| CCI-all education <sup>b</sup>                     | 187 | -34.48 ± 9.14  | 3.33 ± 6.19    | -37.81 ± 6.67  | 0.0002                | 0.59                  | 1.1x10 <sup>-8</sup> | -10% |
| CCI-web <sup>b</sup>                               | 96  | -43.14 ± 17.14 | -2.19 ± 10.29  | -41.05 ± 10.29 | 0.01                  | 0.83                  | 6.6x10 <sup>-5</sup> | 5%   |
| CCI-onsite <sup>b</sup>                            | 91  | -25.33 ± 5.14  | 9.14 ± 6.67    | -34.57 ± 8.29  | 9.4x10 <sup>-7</sup>  | 0.17                  | 3.1x10 <sup>-5</sup> | -36% |
| Difference: web-onsite <sup>c</sup>                |     | -17.81 ± 17.91 | -11.33 ± 12.29 | -6.48 ± 13.24  |                       |                       |                      |      |
| <b>ΔALT (μkat·L<sup>-1</sup>)</b>                  |     |                |                |                |                       |                       |                      |      |
| All starters (Dropouts imputed) <sup>a</sup>       | 262 | -0.15 ± 0.02   | -0.08 ± 0.02   | -0.07 ± 0.01   | 2.4x10 <sup>-10</sup> | 0.0001                | 3.8x10 <sup>-7</sup> | 53%  |
| Completers                                         |     |                |                |                |                       |                       |                      |      |
| CCI-all education <sup>b</sup>                     | 195 | -0.16 ± 0.03   | -0.09 ± 0.03   | -0.08 ± 0.01   | 1.4x10 <sup>-8</sup>  | 0.0004                | 2.7x10 <sup>-7</sup> | 54%  |
| CCI-web <sup>b</sup>                               | 95  | -0.18 ± 0.03   | -0.11 ± 0.03   | -0.07 ± 0.02   | 9.1x10 <sup>-9</sup>  | 0.0002                | 0.0006               | 61%  |
| CCI-onsite <sup>b</sup>                            | 100 | -0.15 ± 0.05   | -0.07 ± 0.04   | -0.08 ± 0.02   | 0.002                 | 0.1                   | 0.0001               | 45%  |
| Difference: web-onsite <sup>c</sup>                |     | -0.04 ± 0.06   | -0.05 ± 0.05   | 0.01 ± 0.03    |                       |                       |                      |      |
| <b>ΔAST (μkat·L<sup>-1</sup>)</b>                  |     |                |                |                |                       |                       |                      |      |
| All starters (Dropouts imputed) <sup>a</sup>       | 262 | -0.08 ± 0.02   | -0.05 ± 0.02   | -0.03 ± 0.01   | 5.1x10 <sup>-7</sup>  | 0.001                 | 0.0005               | 61%  |
| Completers                                         |     |                |                |                |                       |                       |                      |      |
| CCI-all education <sup>b</sup>                     | 195 | -0.09 ± 0.02   | -0.06 ± 0.02   | -0.03 ± 0.01   | 3.8x10 <sup>-6</sup>  | 0.002                 | 0.0006               | 63%  |
| CCI-web <sup>b</sup>                               | 95  | -0.12 ± 0.03   | -0.08 ± 0.03   | -0.04 ± 0.02   | 6.0x10 <sup>-5</sup>  | 0.006                 | 0.02                 | 68%  |

|                                                    |     |              |              |              |                         |                         |                        |        |
|----------------------------------------------------|-----|--------------|--------------|--------------|-------------------------|-------------------------|------------------------|--------|
| CCI-onsite <sup>b</sup>                            | 100 | -0.06 ± 0.02 | -0.03 ± 0.02 | -0.03 ± 0.01 | 0.01                    | 0.12                    | 0.007                  | 53%    |
| Difference: web-onsite <sup>c</sup>                |     | -0.06 ± 0.04 | -0.05 ± 0.04 | -0.01 ± 0.02 |                         |                         |                        |        |
| <b>ΔAlkaline phosphatase (μkat·L<sup>-1</sup>)</b> |     |              |              |              |                         |                         |                        |        |
| All starters (Dropouts imputed) <sup>a</sup>       | 262 | -0.16 ± 0.02 | -0.12 ± 0.01 | -0.04 ± 0.01 | <10 <sup>-16</sup>      | <10 <sup>-16</sup>      | 0.02                   | 78%    |
| Completers                                         |     |              |              |              |                         |                         |                        |        |
| CCI-all education <sup>b</sup>                     | 194 | -0.17 ± 0.02 | -0.13 ± 0.01 | -0.04 ± 0.01 | <10 <sup>-16</sup>      | <10 <sup>-16</sup>      | 0.01                   | 78%    |
| CCI-web <sup>b</sup>                               | 95  | -0.14 ± 0.02 | -0.13 ± 0.02 | -0.02 ± 0.02 | 5.4 × 10 <sup>-5</sup>  | 9.2 × 10 <sup>-10</sup> | 0.45                   | 88%    |
| CCI-onsite <sup>b</sup>                            | 99  | -0.19 ± 0.03 | -0.13 ± 0.02 | -0.06 ± 0.02 | 1.4 × 10 <sup>-12</sup> | 2.9 × 10 <sup>-12</sup> | 0.005                  | 70%    |
| Difference: web-onsite <sup>c</sup>                |     | 0.05 ± 0.03  | 0.01 ± 0.03  | 0.04 ± 0.03  |                         |                         |                        |        |
| <b>ΔSerum creatinine (μmol·L<sup>-1</sup>)</b>     |     |              |              |              |                         |                         |                        |        |
| All starters (Dropouts imputed) <sup>a</sup>       | 262 | -0.04 ± 0.0  | -0.04 ± 0.0  | 0.0 ± 0.0    | 0.0001                  | 2.1 × 10 <sup>-6</sup>  | 0.65                   | 91%    |
| Completers                                         |     |              |              |              |                         |                         |                        |        |
| CCI-all education <sup>b</sup>                     | 196 | -0.04 ± 0.01 | -0.04 ± 0.01 | 0.00 ± 0.01  | 7.6 × 10 <sup>-5</sup>  | 3.8 × 10 <sup>-6</sup>  | 0.68                   | 93%    |
| CCI-web <sup>b</sup>                               | 95  | -0.05 ± 0.01 | -0.04 ± 0.01 | -0.01 ± 0.01 | 0.0003                  | 0.0001                  | 0.36                   | 78%    |
| CCI-onsite <sup>b</sup>                            | 101 | -0.04 ± 0.02 | -0.05 ± 0.01 | 0.00 ± 0.01  | 0.02                    | 0.002                   | 0.78                   | 107%   |
| Difference: web-onsite <sup>c</sup>                |     | 0.00 ± 0.02  | 0.01 ± 0.02  | -0.01 ± 0.02 |                         |                         |                        |        |
| <b>ΔBUN (mmol·L<sup>-1</sup>)</b>                  |     |              |              |              |                         |                         |                        |        |
| All starters (Dropouts imputed) <sup>a</sup>       | 262 | 0.79 ± 0.17  | 0.17 ± 0.12  | 0.62 ± 0.16  | 5.5 × 10 <sup>-6</sup>  | 0.15                    | 7.2 × 10 <sup>-5</sup> | 22.30% |
| Completers                                         |     |              |              |              |                         |                         |                        |        |
| CCI-all education <sup>b</sup>                     | 196 | 0.77 ± 0.18  | 0.11 ± 0.12  | 0.66 ± 0.16  | 1.9 × 10 <sup>-5</sup>  | 0.37                    | 3.7 × 10 <sup>-5</sup> | 15%    |
| CCI-web <sup>b</sup>                               | 95  | 0.45 ± 0.18  | 0.16 ± 0.17  | 0.29 ± 0.15  | 0.01                    | 0.35                    | 0.06                   | 35%    |
| CCI-onsite <sup>b</sup>                            | 101 | 1.07 ± 0.3   | 0.07 ± 0.19  | 1.0 ± 0.27   | 0.0004                  | 0.7                     | 0.0002                 | 7%     |
| Difference: web-onsite <sup>c</sup>                |     | -0.63 ± 0.35 | 0.09 ± 0.25  | -0.71 ± 0.31 |                         |                         |                        |        |
| <b>ΔGFR (mL·s<sup>-1</sup>·m<sup>-2</sup>)</b>     |     |              |              |              |                         |                         |                        |        |
| All starters (Dropouts imputed) <sup>a</sup>       | 262 | 0.03 ± 0.01  | 0.03 ± 0.01  | 0.0 ± 0.01   | 0.005                   | 0.002                   | 0.55                   | 84%    |
| Completers                                         |     |              |              |              |                         |                         |                        |        |
| CCI-all education <sup>b</sup>                     | 196 | 0.04 ± 0.01  | 0.03 ± 0.01  | 0.01 ± 0.01  | 0.0004                  | 0.0004                  | 0.36                   | 80%    |
| CCI-web <sup>b</sup>                               | 95  | 0.04 ± 0.01  | 0.04 ± 0.01  | 0.01 ± 0.01  | 0.003                   | 0.001                   | 0.52                   | 80%    |
| CCI-onsite <sup>b</sup>                            | 101 | 0.04 ± 0.02  | 0.03 ± 0.01  | 0.01 ± 0.01  | 0.04                    | 0.04                    | 0.5                    | 80%    |
| Difference: web-onsite <sup>c</sup>                |     | 0.01 ± 0.02  | 0.01 ± 0.02  | 0.0 ± 0.02   |                         |                         |                        |        |
| <b>ΔAnion gap (mmol·L<sup>-1</sup>)</b>            |     |              |              |              |                         |                         |                        |        |
| All starters (Dropouts imputed) <sup>a</sup>       | 262 | 0.28 ± 0.14  | 0.22 ± 0.13  | 0.06 ± 0.15  | 0.04                    | 0.09                    | 0.68                   | 77%    |
| Completers                                         |     |              |              |              |                         |                         |                        |        |
| CCI-all education <sup>b</sup>                     | 195 | 0.29 ± 0.14  | 0.31 ± 0.14  | -0.02 ± 0.16 | 0.04                    | 0.03                    | 0.92                   | 105%   |

|                                                          |     |               |               |               |                      |                       |                       |         |
|----------------------------------------------------------|-----|---------------|---------------|---------------|----------------------|-----------------------|-----------------------|---------|
| CCI-web <sup>b</sup>                                     | 95  | 0.07 ± 0.2    | 0.01 ± 0.2    | 0.06 ± 0.22   | 0.72                 | 0.96                  | 0.78                  | 14%     |
| CCI-onsite <sup>b</sup>                                  | 100 | 0.5 ± 0.2     | 0.59 ± 0.19   | -0.09 ± 0.22  | 0.01                 | 0.002                 | 0.69                  | 118%    |
| Difference: web-onsite <sup>c</sup>                      |     | -0.43 ± 0.29  | -0.58 ± 0.27* | 0.15 ± 0.31   |                      |                       |                       |         |
| <b>ΔCO<sub>2</sub> (mmol·L<sup>-1</sup>)</b>             |     |               |               |               |                      |                       |                       |         |
| All starters (Dropouts imputed) <sup>a</sup>             | 262 | 0.18 ± 0.16   | -0.2 ± 0.16   | 0.38 ± 0.16   | 0.27                 | 0.2                   | 0.02                  | -113%   |
| Completers                                               |     |               |               |               |                      |                       |                       |         |
| CCI-all education <sup>b</sup>                           | 196 | 0.13 ± 0.16   | -0.27 ± 0.16  | 0.4 ± 0.16    | 0.41                 | 0.09                  | 0.01                  | -204%   |
| CCI-web <sup>b</sup>                                     | 95  | 0.49 ± 0.2    | -0.24 ± 0.2   | 0.74 ± 0.21   | 0.02                 | 0.24                  | 0.0004                | -49%    |
| CCI-onsite <sup>b</sup>                                  | 101 | -0.21 ± 0.25  | -0.3 ± 0.24   | 0.09 ± 0.25   | 0.4                  | 0.22                  | 0.72                  | 143%    |
| Difference: web-onsite <sup>c</sup>                      |     | 0.7 ± 0.32*   | 0.05 ± 0.32   | 0.65 ± 0.32   |                      |                       |                       |         |
| <b>ΔUric acid (μmol·L<sup>-1</sup>)</b>                  |     |               |               |               |                      |                       |                       |         |
| All starters (Dropouts imputed) <sup>a</sup>             | 262 | 1.78 ± 4.76   | 30.93 ± 4.16  | -28.55 ± 4.76 | 0.67                 | 6.6x10 <sup>-13</sup> | 4.0x10 <sup>-10</sup> | 1487%   |
| Completers                                               |     |               |               |               |                      |                       |                       |         |
| CCI-all education <sup>b</sup>                           | 197 | 0.0 ± 5.35    | 28.55 ± 4.76  | -28.55 ± 4.76 | 0.96                 | 1.1x10 <sup>-9</sup>  | 1.2x10 <sup>-9</sup>  | 11800%  |
| CCI-web <sup>b</sup>                                     | 96  | -1.19 ± 7.73  | 32.72 ± 6.54  | -33.31 ± 7.14 | 0.91                 | 3.1x10 <sup>-7</sup>  | 3.3x10 <sup>-6</sup>  | -3507%  |
| CCI-onsite <sup>b</sup>                                  | 101 | 1.19 ± 6.54   | 24.39 ± 6.54  | -23.2 ± 5.95  | 0.83                 | 0.0003                | 8.6x10 <sup>-5</sup>  | 1817%   |
| Difference: web-onsite <sup>c</sup>                      |     | -2.38 ± 10.11 | 7.73 ± 9.52   | -10.11 ± 9.52 |                      |                       |                       |         |
| <b>ΔTSH (mIU·L<sup>-1</sup>)</b>                         |     |               |               |               |                      |                       |                       |         |
| All starters (Dropouts imputed) <sup>a</sup>             |     | -0.42 ± 0.1   | -0.27 ± 0.1   | -0.15 ± 0.08  | 6.0x10 <sup>-5</sup> | 0.008                 | 0.06                  | 64%     |
| Completers                                               |     |               |               |               |                      |                       |                       |         |
| CCI-all education <sup>b</sup>                           | 195 | -0.41 ± 0.12  | -0.29 ± 0.11  | -0.12 ± 0.08  | 0.0005               | 0.008                 | 0.13                  | 72%     |
| CCI-web <sup>b</sup>                                     | 96  | -0.44 ± 0.19  | -0.41 ± 0.17  | -0.03 ± 0.12  | 0.02                 | 0.02                  | 0.78                  | 92%     |
| CCI-onsite <sup>b</sup>                                  | 99  | -0.38 ± 0.14  | -0.18 ± 0.14  | -0.2 ± 0.09   | 0.009                | 0.19                  | 0.04                  | 48%     |
| Difference: web-onsite <sup>c</sup>                      |     | -0.07 ± 0.24  | -0.23 ± 0.22  | 0.16 ± 0.16   |                      |                       |                       |         |
| <b>ΔFree T4 (pmol·L<sup>-1</sup>)</b>                    |     |               |               |               |                      |                       |                       |         |
| All starters (Dropouts imputed) <sup>a</sup>             | 262 | 0.13 ± 0.13   | 0.77 ± 0.13   | -0.64 ± 0.13  | 0.59                 | 2.1x10 <sup>-5</sup>  | 0.0006                | 798.90% |
| Completers                                               |     |               |               |               |                      |                       |                       |         |
| CCI-all education <sup>b</sup>                           | 197 | 0.13 ± 0.13   | 0.77 ± 0.13   | -0.64 ± 0.13  | 0.67                 | 6.4x10 <sup>-5</sup>  | 0.0004                | 1030%   |
| CCI-web <sup>b</sup>                                     | 96  | 0.26 ± 0.26   | 0.9 ± 0.26    | -0.77 ± 0.26  | 0.33                 | 1.1x10 <sup>-5</sup>  | 0.003                 | 412%    |
| CCI-onsite <sup>b</sup>                                  | 101 | -0.13 ± 0.26  | 0.51 ± 0.26   | -0.64 ± 0.26  | 0.76                 | 0.06                  | 0.03                  | -751%   |
| Difference: web-onsite <sup>c</sup>                      |     | 0.26 ± 0.39   | 0.39 ± 0.39   | -0.13 ± 0.39  |                      |                       |                       |         |
| <b>ΔAny diabetes medication, excluding metformin (%)</b> |     |               |               |               |                      |                       |                       |         |
| All starters (Dropouts imputed) <sup>a</sup>             |     | -27.19 ± 3.14 | -22.07 ± 2.67 | -5.12 ± 2.34  | <10 <sup>-16</sup>   | <10 <sup>-16</sup>    | 0.03                  | 81%     |

|                                              |     |               |               |                |                       |                       |      |        |
|----------------------------------------------|-----|---------------|---------------|----------------|-----------------------|-----------------------|------|--------|
| <b>Completers</b>                            |     |               |               |                |                       |                       |      |        |
| CCI-all education <sup>b</sup>               | 218 | -27.52 ± 3.36 | -23.39 ± 2.95 | -4.13 ± 2.37   | 2.210 <sup>-16</sup>  | 2.0x10 <sup>-15</sup> | 0.08 | 85%    |
| CCI-web <sup>b</sup>                         | 104 | -31.73 ± 4.98 | -22.12 ± 4.09 | -9.62 ± 3.99   | 1.8x10 <sup>-10</sup> | 6.4x10 <sup>-8</sup>  | 0.02 | 70%    |
| CCI-onsite <sup>b</sup>                      | 114 | -23.68 ± 4.54 | -24.56 ± 4.24 | 0.88 ± 2.64    | 1.9x10 <sup>-7</sup>  | 6.7x10 <sup>-9</sup>  | 0.74 | 104%   |
| Difference: web-onsite <sup>c</sup>          |     | -8.05 ± 6.74  | 2.45 ± 5.89   | -10.49 ± 4.78* |                       |                       |      |        |
| <b>ΔSulfonylurea (%)</b>                     |     |               |               |                |                       |                       |      |        |
| All starters (Dropouts imputed) <sup>a</sup> |     | -23.67 ± 2.7  | -20.52 ± 2.52 | 3.15±2.60      | <10 <sup>-16</sup>    | 4.4x10 <sup>-16</sup> | 0.23 | 86.70% |
| <b>Completers</b>                            |     |               |               |                |                       |                       |      |        |
| CCI-all education <sup>b</sup>               | 218 | -9.63 ± 2.0   | -9.63 ± 2.0   | 0.0 ± 0.0      | 1.5x10 <sup>-6</sup>  | 1.5x10 <sup>-6</sup>  |      | 100%   |
| CCI-web <sup>b</sup>                         | 104 | -7.69 ± 2.63  | -7.69 ± 2.63  | 0.0 ± 0.0      | 0.003                 | 0.003                 |      | 100%   |
| CCI-onsite <sup>b</sup>                      | 114 | -11.4 ± 2.99  | -11.4 ± 2.99  | 0.0 ± 0.0      | 0.0001                | 0.0001                |      | 100%   |
| Difference: web-onsite <sup>c</sup>          |     | 3.71 ± 3.98   | 3.71 ± 3.98   | 0.0 ± 0.0      |                       |                       |      |        |
| <b>ΔInsulin (%)</b>                          |     |               |               |                |                       |                       |      |        |
| All starters (Dropouts imputed) <sup>a</sup> |     | -13.03 ± 2.23 | -10.31 ± 1.92 | -2.72 ± 1.38   | 5.0x10 <sup>-9</sup>  | 7.9x10 <sup>-8</sup>  | 0.05 | 79%    |
| <b>Completers</b>                            |     |               |               |                |                       |                       |      |        |
| CCI-all education <sup>b</sup>               | 218 | -13.3 ± 2.4   | -11.01 ± 2.12 | -2.29 ± 1.37   | 2.8x10 <sup>-8</sup>  | 2.2x10 <sup>-7</sup>  | 0.09 | 82.80% |
| CCI-web <sup>b</sup>                         | 104 | -11.54 ± 3.43 | -7.69 ± 2.63  | -3.85 ± 2.34   | 0.0008                | 0.003                 | 0.1  | 66.70% |
| CCI-onsite <sup>b</sup>                      | 114 | -14.91 ± 3.35 | -14.04 ± 3.27 | -0.88 ± 1.52   | 8.6x10 <sup>-8</sup>  | 1.7x10 <sup>-5</sup>  | 0.56 | 94.10% |
| Difference: web-onsite <sup>c</sup>          |     | 3.37 ± 4.8    | 6.34 ± 4.19   | -2.97 ± 2.79   |                       |                       |      |        |
| <b>ΔThiazolidinedione (%)</b>                |     |               |               |                |                       |                       |      |        |
| All starters (Dropouts imputed) <sup>a</sup> |     | -1.11 ± 0.9   | -0.38 ± 0.4   | -0.73 ± 0.83   | 0.22                  | 0.34                  | 0.38 | 34.20% |
| <b>Completers</b>                            |     |               |               |                |                       |                       |      |        |
| CCI-all education <sup>b</sup>               | 218 | -1.38 ± 1.02  | -0.46 ± 0.46  | -0.92 ± 0.92   | 0.18                  | 0.32                  | 0.32 | 33.30% |
| CCI-web <sup>b</sup>                         | 104 | -2.88 ± 1.65  | -0.96 ± 0.96  | -1.92 ± 1.35   | 0.08                  | 0.32                  | 0.16 | 33.30% |
| CCI-onsite <sup>b</sup>                      | 114 | 0.00 ± 1.25   | 0.00 ± 0.00   | 0.00 ± 1.25    |                       |                       |      |        |
| Difference: web-onsite <sup>c</sup>          |     | -2.88 ± 2.07  | -0.96 ± 0.96  | -1.92 ± 1.84   |                       |                       |      |        |
| <b>ΔSGLT-2 (%)</b>                           |     |               |               |                |                       |                       |      |        |
| All starters (Dropouts imputed) <sup>a</sup> |     | -9.26 ± 1.88  | -8.77 ± 1.85  | -0.49±1.87     | 9.0x10 <sup>-7</sup>  | 2.0x10 <sup>-6</sup>  | 0.79 | 94.70% |
| <b>Completers</b>                            |     |               |               |                |                       |                       |      |        |
| CCI-all education <sup>b</sup>               | 218 | -9.63 ± 2.0   | -9.63 ± 2.0   | 0.0 ± 0.0      |                       |                       |      |        |
| CCI-web <sup>b</sup>                         | 104 | -7.69 ± 2.63  | -7.69 ± 2.63  | 0.0 ± 0.0      | 1.5 x10 <sup>-6</sup> | 1.5 x10 <sup>-6</sup> |      | 100%   |
| CCI-onsite <sup>b</sup>                      | 114 | -11.4 ± 2.99  | -11.4 ± 2.99  | 0.0 ± 0.0      | 0.003                 | 0.003                 |      | 100%   |
| Difference: web-onsite <sup>c</sup>          |     | 3.71 ± 3.98   | 3.71 ± 3.98   | 0.0 ± 0.0      | 0.0001                | 0.0001                |      | 100%   |

**ΔDPP-4 (%)**

|                                              |     |              |              |              |      |      |      |      |
|----------------------------------------------|-----|--------------|--------------|--------------|------|------|------|------|
| All starters (Dropouts imputed) <sup>a</sup> |     | -3.63 ± 2.22 | -4.26 ± 1.77 | 0.63 ± 1.66  | 0.1  | 0.02 | 0.7  | 118% |
| Completers                                   |     |              |              |              |      |      |      |      |
| CCI-all education <sup>b</sup>               | 218 | -3.67 ± 2.33 | -4.13 ± 1.87 | 0.46 ± 1.66  | 0.12 | 0.03 | 0.78 | 113% |
| CCI-web <sup>b</sup>                         | 104 | -2.88 ± 3.47 | -4.13 ± 1.87 | 2.88 ± 2.54  | 0.41 | 0.01 | 0.26 | 200% |
| CCI-onsite <sup>b</sup>                      | 114 | -4.39 ± 3.15 | -2.63 ± 2.91 | -1.75 ± 2.15 | 0.16 | 0.37 | 0.41 | 60%  |
| Difference: web-onsite <sup>c</sup>          |     | 1.5 ± 4.69   | -3.14 ± 3.71 | 4.64 ± 3.33  |      |      |      |      |

**ΔGLP-1 (%)**

|                                              |     |              |              |              |      |      |      |         |
|----------------------------------------------|-----|--------------|--------------|--------------|------|------|------|---------|
| All starters (Dropouts imputed) <sup>a</sup> |     | 1.04 ± 2.29  | -1.53 ± 1.69 | 2.57 ± 2.11  | 0.65 | 0.36 | 0.22 | -147%   |
| Completers                                   |     |              |              |              |      |      |      |         |
| CCI-all education <sup>b</sup>               | 218 | 0.92 ± 2.34  | -1.38 ± 1.78 | 2.29 ± 2.1   | 0.7  | 0.44 | 0.28 | -150%   |
| CCI-web <sup>b</sup>                         | 104 | -0.96 ± 3.2  | -1.92 ± 1.92 | 0.96 ± 3.2   | 0.76 | 0.32 | 0.76 | 200%    |
| CCI-onsite <sup>b</sup>                      | 114 | 2.63 ± 3.4   | -0.88 ± 2.92 | 3.51 ± 2.77  | 0.44 | 0.76 | 0.2  | -33.30% |
| Difference: web-onsite <sup>c</sup>          |     | -3.59 ± 4.67 | -1.05 ± 3.5  | -2.55 ± 4.23 |      |      |      |         |

**ΔMetformin (%)**

|                                              |     |              |              |              |      |      |      |     |
|----------------------------------------------|-----|--------------|--------------|--------------|------|------|------|-----|
| All starters (Dropouts imputed) <sup>a</sup> |     | -6.19 ± 3.07 | -0.79 ± 1.7  | -5.4 ± 2.79  | 0.04 | 0.64 | 0.05 | 13% |
| Completers                                   |     |              |              |              |      |      |      |     |
| CCI-all education <sup>b</sup>               | 218 | -7.34 ± 3.15 | -1.83 ± 1.83 | -5.5 ± 2.81  | 0.02 | 0.32 | 0.05 | 25% |
| CCI-web <sup>b</sup>                         | 104 | -7.69 ± 4.67 | -2.88 ± 2.88 | -4.81 ± 3.96 | 0.10 | 0.32 | 0.22 | 38% |
| CCI-onsite <sup>b</sup>                      | 114 | -7.02 ± 4.27 | -0.88 ± 2.33 | -6.14 ± 4.0  | 0.10 | 0.71 | 0.12 | 13% |
| Difference: web-onsite <sup>c</sup>          |     | -0.67 ± 6.33 | -2.01 ± 3.71 | 1.33 ± 5.62  |      |      |      |     |

<sup>a</sup> Imputed values based on 700 iterations from multivariate normal regression.

<sup>b</sup> Mean differences ± one standard error. Sample sizes, means, and significance levels refer to intervention subjects with baseline, 70-day, and one-year measurements for *completers*. Significance levels for *completers* refer to one-sample t-test. Untransformed triglyceride and hsC-reactive protein values are presented, however, their statistical significances were based on their log-transformed values.

<sup>c</sup> Significance levels refer to two-sample t-test of the differences are designated for 0.05>P≥0.01 (\*); 0.01>P≥0.001 (+); 0.001>P≥0.0001 (‡); and P<0.0001 (§).

<sup>d</sup> A significance level of P<0.0017 ensures overall simultaneous significance of P≤0.05 over the 30 variables using Bonferroni correction.
